# Supplementary material for: High genetic diversity, clonal activation of hypnozoites and relapse of Plasmodium vivax isolates in low-transmission setting of Ethiopia
Source: Research Square preprint supplement (doi:10.21203/rs.3.rs-9080494/v1), 2026-03-26
Supplement: Supplementary file 1 [file 3001873dab8df4914b9fc115.docx]

# **Supplementary information**

**Figure S1**. Phylogenetic analysis of 26 predominant haplotypes and reference KP759875

**Figure S2**. Frequency of unique *msp1* haplotypes within the study population. Only haplotypes that appeared in more than one sample are shown. The blue bar represents the frequency of major haplotype (exhibiting >20% frequency within the individual sample), and the red portions of the columns represent the proportion that occurred as a minority variant (existing at 0.5%-20% frequency within the individual sample).

**
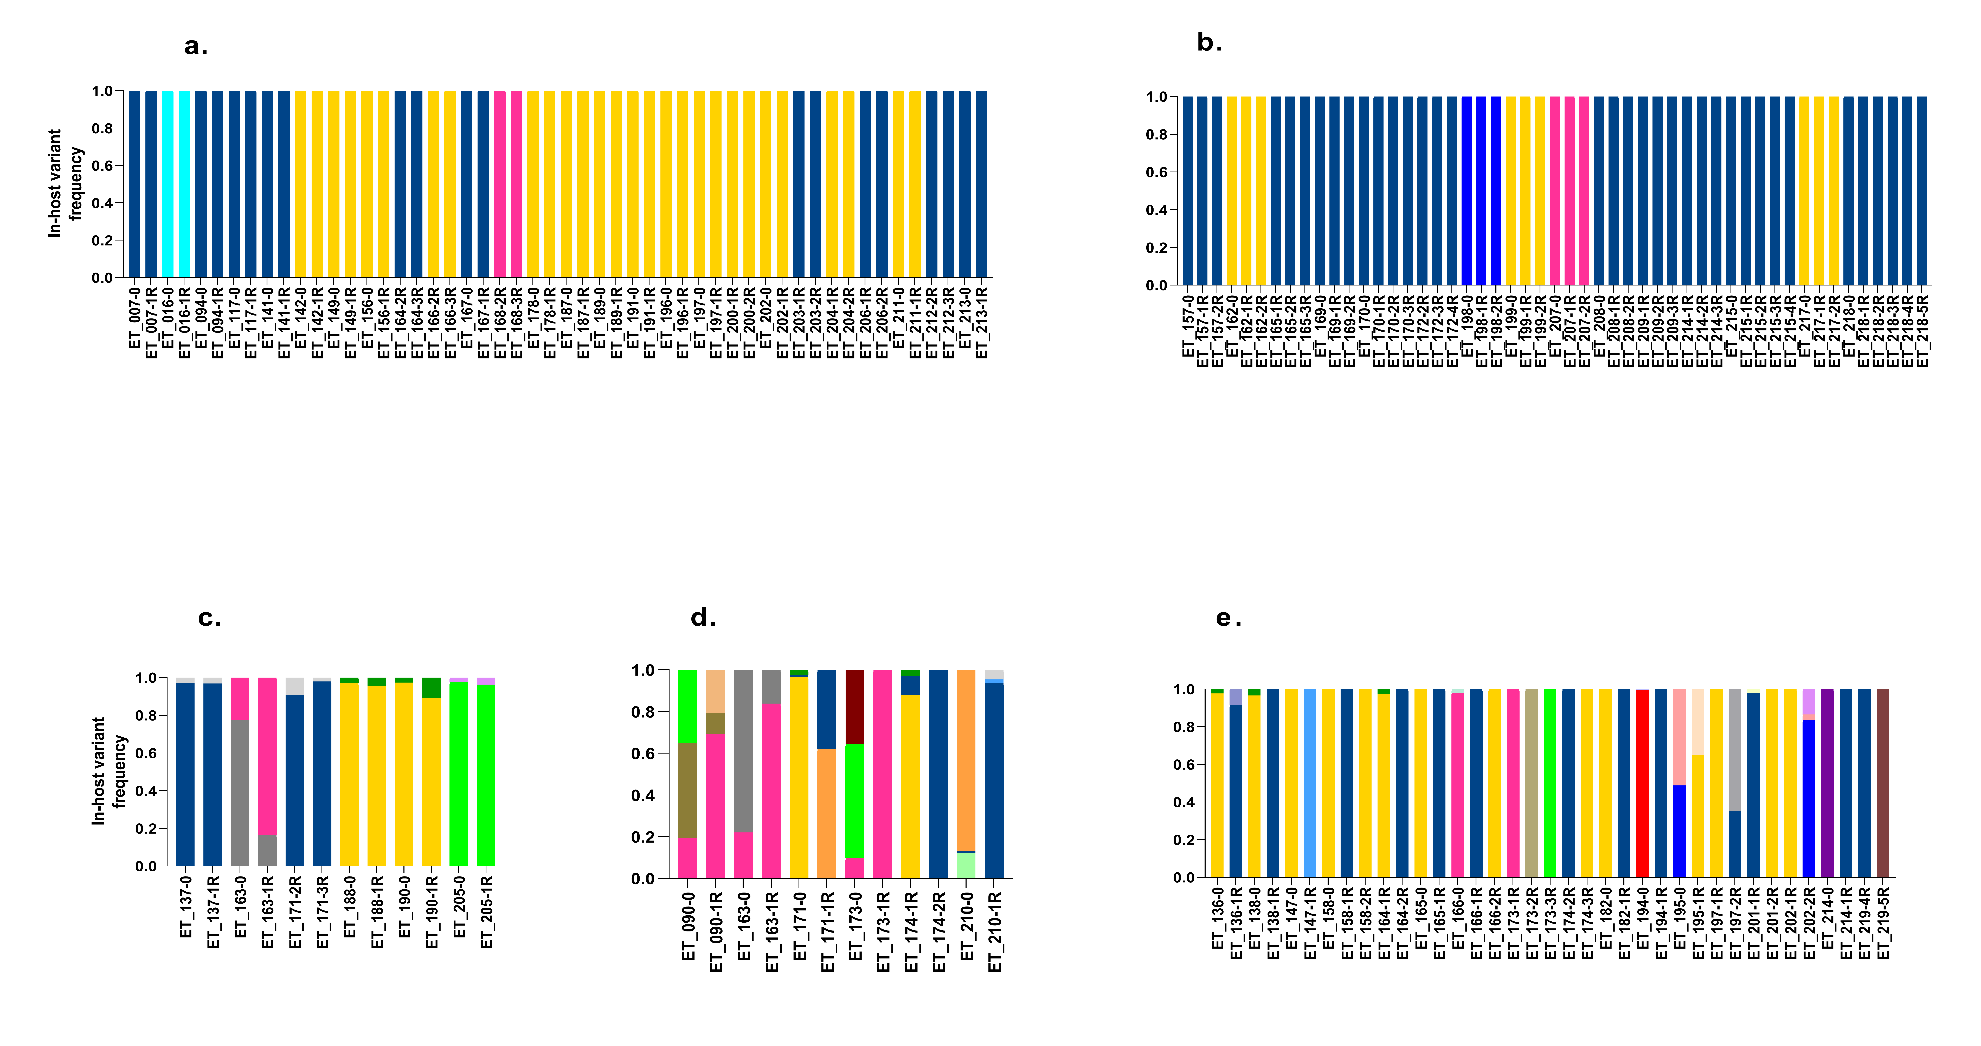
**

**Figure S3.** Homologous and heterologous pairs of 82 patients based on the overlap of *pvmsp1* variants in the recurrent and preceding infection OF 155 paired samples. Unique haplotypes (alleles) are represented by specific colors across all samples. **a**. Homologous pairs with clonal relapse in a single relapse episode, **b**. Homologous pairs with clonal relapses in multiple relapse episodes, **c**. Homologous identical pairs with two clones, **d**. Pairs exhibiting minority variant expansion (allele existing at <20% in-host frequency in the primary infection reappeared as the dominant or increased >20 in-host frequency at recurrence). **e**. Heterologous pairs with no overlap alleles at all. The x-axis indicate sample ID, 0=primary infection, 1R= first recurrence, 2R= second recurrence and so on.
