# Supplementary material for: High genetic diversity, clonal activation of hypnozoites and relapse of Plasmodium vivax isolates in low-transmission setting of Ethiopia
Source: Research Square preprint supplement (doi:10.21203/rs.3.rs-9080494/v1), 2026-03-26
Supplement: Supplementary file 2 [file 8025174906fa1c112432a025.xlsx]

## Sheet: Sheet1
Additional file 1: Amplicon deep sequencing data of 370 P. vivax samples
Sample No.	Location	Year	Symptoms	Episod	Gender	Predominant Haplotype	h_PopFrac	read clustered	%	MOI	Predominant h_Frac (%)	309bp sequence	GenBank acc.	Repository	WEB LINK
ET_001	Ethiopia	2021-06-08	Symptomatic	0	F	H16	0.993145	1983	77.8114	1	100	GAGGAGAAGAAGAAGAAGCTTATAGGCAGCTACAAGTACATCGGTGCATCGATCGACAAGGATCTGGCCACCGCGAATGATGGCGTGGCGTACTACAACAAGATGGAGGAGCTCTACAAGACGCACTTGACTGCAGTGAATGAAGAGGTTAAGAAAGTCGAAGCTGATATTAAAAAAGAAGATGATAAGATTAAAAAGATAGAAAATGAAGCCAATAAAACTGCTGAAAAGACCCAATCGATGGCCAAAAAGGCCGAGCTGGAGAAGTACCTCCCGTTCCTGAATAGCCTCCAAAAGGAGTACGAGTCC	PX841045	NCBI	https://www.ncbi.nlm.nih.gov/nuccore/PX841045
ET_002	Ethiopia	2020-10-26	Symptomatic	0	F	H01	0.00892495	5802	73.9055	1	100	GAGGAGAAGAAGAAGAAGCTTATAGGCAGCTACAAGTACATCGGTGCATCGATCGACATGGATCTGGCCACCGCGAATGATGGCGTGGCGTACTACAACAAGATGGAGGAGCTCTACAAGACGCACTTGGATGGAGTGAAAACAGAGATTAAGAAAGTCGAAGATGATATTAAAAAACATGATGAGAAGCTTAAAAAGATAGAAAATGAAGCCAGTAAAACTAGTGAAAAGACCCAATTGAATGCCAAAAAGGCCGAGCTGGAGAAGTACCTCCCGTTCCTGAATAGCCTCCAAAAGGAGTACGAGTCC	PX841046	NCBI	https://www.ncbi.nlm.nih.gov/nuccore/PX841046
ET_003	Ethiopia	2021-06-30	Symptomatic	0	M	H11	0.500697	9318	38.7422	3	53.842	GAGGAGAAGAAGAAGAAGCTTCTAGGCAGCTACAAGTACATCGGTGCATCGATCGACAAGGATCTGGCCACCGCGAATGATGGCGTGGCGTACTACAACAAGATGGAGGAGCTCTACAAGACGCACTTGACTGCAGTGAATGAAGAGGTTAAGAAAGTCGAAGCTGATATTAAAAAAGAAGATGATAAGATTAAAAAGATAGAAAATGAAGCCAATAAAACTGCTGAAAAGACCCAATCGATGGCCAAAAAGGCCGAGCTGGAGAAGTACCTCCCGTTCCTGAATAGCCTCCAAAAGGAGTACGAGTCC	PX841047	NCBI	https://www.ncbi.nlm.nih.gov/nuccore/PX841047
ET_004	Ethiopia	2020-10-31	Symptomatic	0	M	H02	0.0275049	13953	69.3901	2	96.5384	GAGGAGAAGAAGAAGAAGCTTATAGGCAGCTACAAGTACATCGGTGCATCGATCGACAAGGATCTGGCCACCGCGAATGATGGCGTGGCGTACTACAACAAGATGGAGGAGCTCTACAAGACGCACTTGACTGCAGTGAATGCACAGATTAAGAAAGTCGAAGATGATATTAAAAAACAAAATGAGGAGCTTAAAAAGATAGAAAATGAAGCCAATAAAACTGCTGAAAAGGCTAAATTTACTGCCAAAAAGGCCGAGTTGGAGAAGTACCTCCCATTCCTGAATAGCCTCCAAAAGGAGTACGAGTCC	PX841048	NCBI	https://www.ncbi.nlm.nih.gov/nuccore/PX841048
ET_005	Ethiopia	2020-11-11	Symptomatic	0	F	H02	0.0275049	5727	41.9417	2	68.3429	GAGGAGAAGAAGAAGAAGCTTATAGGCAGCTACAAGTACATCGGTGCATCGATCGACAAGGATCTGGCCACCGCGAATGATGGCGTGGCGTACTACAACAAGATGGAGGAGCTCTACAAGACGCACTTGACTGCAGTGAATGCACAGATTAAGAAAGTCGAAGATGATATTAAAAAACAAAATGAGGAGCTTAAAAAGATAGAAAATGAAGCCAATAAAACTGCTGAAAAGGCTAAATTTACTGCCAAAAAGGCCGAGTTGGAGAAGTACCTCCCATTCCTGAATAGCCTCCAAAAGGAGTACGAGTCC	PX841048	NCBI	https://www.ncbi.nlm.nih.gov/nuccore/PX841048
ET_006	Ethiopia	2020-10-31	Symptomatic	0	M	H01	0.00892495	8494	60.8783	2	89.5456	GAGGAGAAGAAGAAGAAGCTTATAGGCAGCTACAAGTACATCGGTGCATCGATCGACATGGATCTGGCCACCGCGAATGATGGCGTGGCGTACTACAACAAGATGGAGGAGCTCTACAAGACGCACTTGGATGGAGTGAAAACAGAGATTAAGAAAGTCGAAGATGATATTAAAAAACATGATGAGAAGCTTAAAAAGATAGAAAATGAAGCCAGTAAAACTAGTGAAAAGACCCAATTGAATGCCAAAAAGGCCGAGCTGGAGAAGTACCTCCCGTTCCTGAATAGCCTCCAAAAGGAGTACGAGTCC	PX841046	NCBI	https://www.ncbi.nlm.nih.gov/nuccore/PX841046
ET_007	Ethiopia	2021-06-29	Symptomatic	0	M	H01	0.00892495	3180	71.2893	1	100	GAGGAGAAGAAGAAGAAGCTTATAGGCAGCTACAAGTACATCGGTGCATCGATCGACATGGATCTGGCCACCGCGAATGATGGCGTGGCGTACTACAACAAGATGGAGGAGCTCTACAAGACGCACTTGGATGGAGTGAAAACAGAGATTAAGAAAGTCGAAGATGATATTAAAAAACATGATGAGAAGCTTAAAAAGATAGAAAATGAAGCCAGTAAAACTAGTGAAAAGACCCAATTGAATGCCAAAAAGGCCGAGCTGGAGAAGTACCTCCCGTTCCTGAATAGCCTCCAAAAGGAGTACGAGTCC	PX841046	NCBI	https://www.ncbi.nlm.nih.gov/nuccore/PX841046
ET_007	Ethiopia	2021-08-08	Symptomatic	1	M	H01	0.00892495	1471	100	1	100	GAGGAGAAGAAGAAGAAGCTTATAGGCAGCTACAAGTACATCGGTGCATCGATCGACATGGATCTGGCCACCGCGAATGATGGCGTGGCGTACTACAACAAGATGGAGGAGCTCTACAAGACGCACTTGGATGGAGTGAAAACAGAGATTAAGAAAGTCGAAGATGATATTAAAAAACATGATGAGAAGCTTAAAAAGATAGAAAATGAAGCCAGTAAAACTAGTGAAAAGACCCAATTGAATGCCAAAAAGGCCGAGCTGGAGAAGTACCTCCCGTTCCTGAATAGCCTCCAAAAGGAGTACGAGTCC	PX841046	NCBI	https://www.ncbi.nlm.nih.gov/nuccore/PX841046
ET_008	Ethiopia	2020-07-15	Symptomatic	0	F	H02	0.0275049	2236	72.0036	2	96.8694	GAGGAGAAGAAGAAGAAGCTTATAGGCAGCTACAAGTACATCGGTGCATCGATCGACAAGGATCTGGCCACCGCGAATGATGGCGTGGCGTACTACAACAAGATGGAGGAGCTCTACAAGACGCACTTGACTGCAGTGAATGCACAGATTAAGAAAGTCGAAGATGATATTAAAAAACAAAATGAGGAGCTTAAAAAGATAGAAAATGAAGCCAATAAAACTGCTGAAAAGGCTAAATTTACTGCCAAAAAGGCCGAGTTGGAGAAGTACCTCCCATTCCTGAATAGCCTCCAAAAGGAGTACGAGTCC	PX841048	NCBI	https://www.ncbi.nlm.nih.gov/nuccore/PX841048
ET_009	Ethiopia	2020-06-18	Symptomatic	0	F	H02	0.0275049	6022	68.0007	1	100	GAGGAGAAGAAGAAGAAGCTTATAGGCAGCTACAAGTACATCGGTGCATCGATCGACAAGGATCTGGCCACCGCGAATGATGGCGTGGCGTACTACAACAAGATGGAGGAGCTCTACAAGACGCACTTGACTGCAGTGAATGCACAGATTAAGAAAGTCGAAGATGATATTAAAAAACAAAATGAGGAGCTTAAAAAGATAGAAAATGAAGCCAATAAAACTGCTGAAAAGGCTAAATTTACTGCCAAAAAGGCCGAGTTGGAGAAGTACCTCCCATTCCTGAATAGCCTCCAAAAGGAGTACGAGTCC	PX841048	NCBI	https://www.ncbi.nlm.nih.gov/nuccore/PX841048
ET_010	Ethiopia	2020-09-17	Symptomatic	0	M	H02	0.0275049	8248	75.0485	1	100	GAGGAGAAGAAGAAGAAGCTTATAGGCAGCTACAAGTACATCGGTGCATCGATCGACAAGGATCTGGCCACCGCGAATGATGGCGTGGCGTACTACAACAAGATGGAGGAGCTCTACAAGACGCACTTGACTGCAGTGAATGCACAGATTAAGAAAGTCGAAGATGATATTAAAAAACAAAATGAGGAGCTTAAAAAGATAGAAAATGAAGCCAATAAAACTGCTGAAAAGGCTAAATTTACTGCCAAAAAGGCCGAGTTGGAGAAGTACCTCCCATTCCTGAATAGCCTCCAAAAGGAGTACGAGTCC	PX841048	NCBI	https://www.ncbi.nlm.nih.gov/nuccore/PX841048
ET_011	Ethiopia	2021-01-23	Symptomatic	0	M	H07	0.0637647	4758	61.2022	1	100	GAGGAGAAGAAGAAGAAGCTTCTAGGCAGCTACAAGTACATCGGTGCATCGATCGACAAGGATCTGGCCACCGCGAATGATGGCGTGGCGTACTACAACAAGATGGAGGAGCTCTACAAGACGCACTTGACTGCAGTGAATGCACAGATTAAGAAAGTCGAAGATGATATTAAAAAGCAAGATGAGGAGCTTAAAAAGATAGAAAATGAAGCCAATAAAACTGCTGAAAAGGCTAAATTTACTGCCAAAAAGGCCGAGTTGGAGAAGTACCTCCCATTCCTGAATAGCCTCCAAAAGGAGTACGAGTCC	PX841049	NCBI	https://www.ncbi.nlm.nih.gov/nuccore/PX841049
ET_012	Ethiopia	2020-10-30	Symptomatic	0	M	H02	0.0275049	9994	59.8859	1	100	GAGGAGAAGAAGAAGAAGCTTATAGGCAGCTACAAGTACATCGGTGCATCGATCGACAAGGATCTGGCCACCGCGAATGATGGCGTGGCGTACTACAACAAGATGGAGGAGCTCTACAAGACGCACTTGACTGCAGTGAATGCACAGATTAAGAAAGTCGAAGATGATATTAAAAAACAAAATGAGGAGCTTAAAAAGATAGAAAATGAAGCCAATAAAACTGCTGAAAAGGCTAAATTTACTGCCAAAAAGGCCGAGTTGGAGAAGTACCTCCCATTCCTGAATAGCCTCCAAAAGGAGTACGAGTCC	PX841048	NCBI	https://www.ncbi.nlm.nih.gov/nuccore/PX841048
ET_013	Ethiopia	2021-10-22	Symptomatic	0	M	H01	0.00892495	8364	71.5925	1	100	GAGGAGAAGAAGAAGAAGCTTATAGGCAGCTACAAGTACATCGGTGCATCGATCGACATGGATCTGGCCACCGCGAATGATGGCGTGGCGTACTACAACAAGATGGAGGAGCTCTACAAGACGCACTTGGATGGAGTGAAAACAGAGATTAAGAAAGTCGAAGATGATATTAAAAAACATGATGAGAAGCTTAAAAAGATAGAAAATGAAGCCAGTAAAACTAGTGAAAAGACCCAATTGAATGCCAAAAAGGCCGAGCTGGAGAAGTACCTCCCGTTCCTGAATAGCCTCCAAAAGGAGTACGAGTCC	PX841046	NCBI	https://www.ncbi.nlm.nih.gov/nuccore/PX841046
ET_014	Ethiopia	2021-06-01	Symptomatic	0	F	H01	0.00892495	11498	72.3343	1	100	GAGGAGAAGAAGAAGAAGCTTATAGGCAGCTACAAGTACATCGGTGCATCGATCGACATGGATCTGGCCACCGCGAATGATGGCGTGGCGTACTACAACAAGATGGAGGAGCTCTACAAGACGCACTTGGATGGAGTGAAAACAGAGATTAAGAAAGTCGAAGATGATATTAAAAAACATGATGAGAAGCTTAAAAAGATAGAAAATGAAGCCAGTAAAACTAGTGAAAAGACCCAATTGAATGCCAAAAAGGCCGAGCTGGAGAAGTACCTCCCGTTCCTGAATAGCCTCCAAAAGGAGTACGAGTCC	PX841046	NCBI	https://www.ncbi.nlm.nih.gov/nuccore/PX841046
ET_015	Ethiopia	2021-01-18	Symptomatic	0	M	H01	0.00892495	3466	62.2908	1	100	GAGGAGAAGAAGAAGAAGCTTATAGGCAGCTACAAGTACATCGGTGCATCGATCGACATGGATCTGGCCACCGCGAATGATGGCGTGGCGTACTACAACAAGATGGAGGAGCTCTACAAGACGCACTTGGATGGAGTGAAAACAGAGATTAAGAAAGTCGAAGATGATATTAAAAAACATGATGAGAAGCTTAAAAAGATAGAAAATGAAGCCAGTAAAACTAGTGAAAAGACCCAATTGAATGCCAAAAAGGCCGAGCTGGAGAAGTACCTCCCGTTCCTGAATAGCCTCCAAAAGGAGTACGAGTCC	PX841046	NCBI	https://www.ncbi.nlm.nih.gov/nuccore/PX841046
ET_016	Ethiopia	2020-01-22	Symptomatic	0	M	H10	0.46469	11620	68.9673	1	100	GAGGAGAAGAAGAAGAAGCTTCTAGGCAGCTACAAGTACATCGGTGCATCGATCGACAAGGATCTGGCCACCGCGAATGATGGCGTGGCGTACTACAACAAGATGGGGGAGCTCTACAAGACGCACTTGGATGGAGTGAAAACAGAGATTAAGAAAGTCGAAGATGATATTAAAAAGCAAGATGAGGAACTTAAAAAGATAGAAAATGTTACCAGTAAAACTAGTAAAAAGAACGAATTTATTGCCAAAAAGGCCGAGCTGGAGAAGTACCTCCCGTTCCTGAATAGCCTCCAAAAGGAGTACGAGTCC	PX841050	NCBI	https://www.ncbi.nlm.nih.gov/nuccore/PX841050
ET_016	Ethiopia	2020-02-24	Symptomatic	1	M	H10	0.46469	4471	76.5153	1	100	GAGGAGAAGAAGAAGAAGCTTCTAGGCAGCTACAAGTACATCGGTGCATCGATCGACAAGGATCTGGCCACCGCGAATGATGGCGTGGCGTACTACAACAAGATGGGGGAGCTCTACAAGACGCACTTGGATGGAGTGAAAACAGAGATTAAGAAAGTCGAAGATGATATTAAAAAGCAAGATGAGGAACTTAAAAAGATAGAAAATGTTACCAGTAAAACTAGTAAAAAGAACGAATTTATTGCCAAAAAGGCCGAGCTGGAGAAGTACCTCCCGTTCCTGAATAGCCTCCAAAAGGAGTACGAGTCC	PX841050	NCBI	https://www.ncbi.nlm.nih.gov/nuccore/PX841050
ET_017	Ethiopia	2019-09-05	Symptomatic	0	M	H02	0.0275049	6090	64.1051	3	92.0525	GAGGAGAAGAAGAAGAAGCTTATAGGCAGCTACAAGTACATCGGTGCATCGATCGACAAGGATCTGGCCACCGCGAATGATGGCGTGGCGTACTACAACAAGATGGAGGAGCTCTACAAGACGCACTTGACTGCAGTGAATGCACAGATTAAGAAAGTCGAAGATGATATTAAAAAACAAAATGAGGAGCTTAAAAAGATAGAAAATGAAGCCAATAAAACTGCTGAAAAGGCTAAATTTACTGCCAAAAAGGCCGAGTTGGAGAAGTACCTCCCATTCCTGAATAGCCTCCAAAAGGAGTACGAGTCC	PX841048	NCBI	https://www.ncbi.nlm.nih.gov/nuccore/PX841048
ET_018	Ethiopia	2020-07-15	Symptomatic	0	F	H02	0.0275049	6824	74.9414	1	100	GAGGAGAAGAAGAAGAAGCTTATAGGCAGCTACAAGTACATCGGTGCATCGATCGACAAGGATCTGGCCACCGCGAATGATGGCGTGGCGTACTACAACAAGATGGAGGAGCTCTACAAGACGCACTTGACTGCAGTGAATGCACAGATTAAGAAAGTCGAAGATGATATTAAAAAACAAAATGAGGAGCTTAAAAAGATAGAAAATGAAGCCAATAAAACTGCTGAAAAGGCTAAATTTACTGCCAAAAAGGCCGAGTTGGAGAAGTACCTCCCATTCCTGAATAGCCTCCAAAAGGAGTACGAGTCC	PX841048	NCBI	https://www.ncbi.nlm.nih.gov/nuccore/PX841048
ET_019	Ethiopia	2021-01-21	Symptomatic	0	M	H01	0.00892495	5036	68.5068	1	100	GAGGAGAAGAAGAAGAAGCTTATAGGCAGCTACAAGTACATCGGTGCATCGATCGACATGGATCTGGCCACCGCGAATGATGGCGTGGCGTACTACAACAAGATGGAGGAGCTCTACAAGACGCACTTGGATGGAGTGAAAACAGAGATTAAGAAAGTCGAAGATGATATTAAAAAACATGATGAGAAGCTTAAAAAGATAGAAAATGAAGCCAGTAAAACTAGTGAAAAGACCCAATTGAATGCCAAAAAGGCCGAGCTGGAGAAGTACCTCCCGTTCCTGAATAGCCTCCAAAAGGAGTACGAGTCC	PX841046	NCBI	https://www.ncbi.nlm.nih.gov/nuccore/PX841046
ET_020	Ethiopia	2021-03-04	Symptomatic	0	M	H01	0.00892495	8519	76.1005	2	96.901	GAGGAGAAGAAGAAGAAGCTTATAGGCAGCTACAAGTACATCGGTGCATCGATCGACATGGATCTGGCCACCGCGAATGATGGCGTGGCGTACTACAACAAGATGGAGGAGCTCTACAAGACGCACTTGGATGGAGTGAAAACAGAGATTAAGAAAGTCGAAGATGATATTAAAAAACATGATGAGAAGCTTAAAAAGATAGAAAATGAAGCCAGTAAAACTAGTGAAAAGACCCAATTGAATGCCAAAAAGGCCGAGCTGGAGAAGTACCTCCCGTTCCTGAATAGCCTCCAAAAGGAGTACGAGTCC	PX841046	NCBI	https://www.ncbi.nlm.nih.gov/nuccore/PX841046
ET_021	Ethiopia	2021-01-25	Symptomatic	0	F	H02	0.0275049	1962	70.4383	1	100	GAGGAGAAGAAGAAGAAGCTTATAGGCAGCTACAAGTACATCGGTGCATCGATCGACAAGGATCTGGCCACCGCGAATGATGGCGTGGCGTACTACAACAAGATGGAGGAGCTCTACAAGACGCACTTGACTGCAGTGAATGCACAGATTAAGAAAGTCGAAGATGATATTAAAAAACAAAATGAGGAGCTTAAAAAGATAGAAAATGAAGCCAATAAAACTGCTGAAAAGGCTAAATTTACTGCCAAAAAGGCCGAGTTGGAGAAGTACCTCCCATTCCTGAATAGCCTCCAAAAGGAGTACGAGTCC	PX841048	NCBI	https://www.ncbi.nlm.nih.gov/nuccore/PX841048
ET_022	Ethiopia	2020-11-24	Symptomatic	0	M	H06	0.0245161	20370	57.9431	1	100	GAGGAGAAGAAGAAGAAGCTTCTAGGCAGCTACAAGTACATCGGTGCATCGATCGACAAGGATCTGGCCACCGCGAATGATGGCGTGACCTACTACAACAAGATGGGGGAGCTCTACAAGACGCACTTGGATGGAGTGAAAACAGAGATTAAGAAAGTCGAAGATGATATTAAAAAGCAAGATGAGGAACTTAAAAAGATAGAAAATGTTACCAGTAAAACTAGTAAAAAGAACGAATTTATTGCCAAAAAGGCCGAGCTGGAGAAGTACCTCCCGTTCCTGAATAGCCTCCAAAAGGAGTACGAGTCC	PX841051	NCBI	https://www.ncbi.nlm.nih.gov/nuccore/PX841051
ET_023	Ethiopia	2020-11-25	Symptomatic	0	M	H01	0.00892495	2189	100	1	100	GAGGAGAAGAAGAAGAAGCTTATAGGCAGCTACAAGTACATCGGTGCATCGATCGACATGGATCTGGCCACCGCGAATGATGGCGTGGCGTACTACAACAAGATGGAGGAGCTCTACAAGACGCACTTGGATGGAGTGAAAACAGAGATTAAGAAAGTCGAAGATGATATTAAAAAACATGATGAGAAGCTTAAAAAGATAGAAAATGAAGCCAGTAAAACTAGTGAAAAGACCCAATTGAATGCCAAAAAGGCCGAGCTGGAGAAGTACCTCCCGTTCCTGAATAGCCTCCAAAAGGAGTACGAGTCC	PX841046	NCBI	https://www.ncbi.nlm.nih.gov/nuccore/PX841046
ET_024	Ethiopia	2021-01-25	Symptomatic	0	M	H01	0.00892495	3228	72.9244	1	100	GAGGAGAAGAAGAAGAAGCTTATAGGCAGCTACAAGTACATCGGTGCATCGATCGACATGGATCTGGCCACCGCGAATGATGGCGTGGCGTACTACAACAAGATGGAGGAGCTCTACAAGACGCACTTGGATGGAGTGAAAACAGAGATTAAGAAAGTCGAAGATGATATTAAAAAACATGATGAGAAGCTTAAAAAGATAGAAAATGAAGCCAGTAAAACTAGTGAAAAGACCCAATTGAATGCCAAAAAGGCCGAGCTGGAGAAGTACCTCCCGTTCCTGAATAGCCTCCAAAAGGAGTACGAGTCC	PX841046	NCBI	https://www.ncbi.nlm.nih.gov/nuccore/PX841046
ET_025	Ethiopia	2020-11-01	Symptomatic	0	M	H01	0.00892495	4390	78.9749	1	100	GAGGAGAAGAAGAAGAAGCTTATAGGCAGCTACAAGTACATCGGTGCATCGATCGACATGGATCTGGCCACCGCGAATGATGGCGTGGCGTACTACAACAAGATGGAGGAGCTCTACAAGACGCACTTGGATGGAGTGAAAACAGAGATTAAGAAAGTCGAAGATGATATTAAAAAACATGATGAGAAGCTTAAAAAGATAGAAAATGAAGCCAGTAAAACTAGTGAAAAGACCCAATTGAATGCCAAAAAGGCCGAGCTGGAGAAGTACCTCCCGTTCCTGAATAGCCTCCAAAAGGAGTACGAGTCC	PX841046	NCBI	https://www.ncbi.nlm.nih.gov/nuccore/PX841046
ET_026	Ethiopia	2020-10-06	Symptomatic	0	M	H03	0.0231214	991	62.0585	2	62.0585	GAGGAGAAGAAGAAGAAGCTTATAGGCAGCTACAAGTACATCGGTGCATCGATCGACATGGATCTGGCCACCGCGAATGATGGCGTGGCGTACTACAACAAGATGGAGGAGCTCTACAAGACGCACTTGACTGCAGTGAATGAAGAGGTTAAGAAAGTCGAAGCTGATATTAAAAAAGAAGATGATAAGATTAAAAAGATAGAAAATGATACCACTAAAACTACTGAAAAGACCCAATCGATGGCCAAAAAGGCCGAGCTGGAGAAGTACCTCCCGTTCCTGAATAGCCTCCAAAAGGAGTACGAGTCC	PX841052	NCBI	https://www.ncbi.nlm.nih.gov/nuccore/PX841052
ET_027	Ethiopia	2020-03-05	Symptomatic	0	F	H02	0.0275049	6852	44.4396	3	62.8284	GAGGAGAAGAAGAAGAAGCTTATAGGCAGCTACAAGTACATCGGTGCATCGATCGACAAGGATCTGGCCACCGCGAATGATGGCGTGGCGTACTACAACAAGATGGAGGAGCTCTACAAGACGCACTTGACTGCAGTGAATGCACAGATTAAGAAAGTCGAAGATGATATTAAAAAACAAAATGAGGAGCTTAAAAAGATAGAAAATGAAGCCAATAAAACTGCTGAAAAGGCTAAATTTACTGCCAAAAAGGCCGAGTTGGAGAAGTACCTCCCATTCCTGAATAGCCTCCAAAAGGAGTACGAGTCC	PX841048	NCBI	https://www.ncbi.nlm.nih.gov/nuccore/PX841048
ET_028	Ethiopia	2019-09-13	Symptomatic	0	F	H09	0.894651	6901	78.8436	1	100	GAGGAGAAGAAGAAGAAGCTTATAGGCAGCTACAAGTACATCGGTGCATCGATCGACAAGGATCTGGCCACCGCGAATGATGGCGTGGCGTACTACAACAAGATGGAGGAGCTCTACAAGACGCACTTGACTGCAGTGAATGCACAGATTAAGAAAGTCGAAGATGATATTAAAAAACAAAATGAGGAGCTTAAAAAGATAGAAAATGAAGCCAATAAAACTGCTGAAAAGGCTAAATTTACTGCCAAAAAGGCCGAGCTGGAGAAGTACCTCCCGTTCCTGAATAGCCTCCAAAAGGAGTACGAGTCC	PX841053	NCBI	https://www.ncbi.nlm.nih.gov/nuccore/PX841053
ET_029	Ethiopia	2019-09-19	Symptomatic	0	M	H02	0.0275049	1661	100	1	100	GAGGAGAAGAAGAAGAAGCTTATAGGCAGCTACAAGTACATCGGTGCATCGATCGACAAGGATCTGGCCACCGCGAATGATGGCGTGGCGTACTACAACAAGATGGAGGAGCTCTACAAGACGCACTTGACTGCAGTGAATGCACAGATTAAGAAAGTCGAAGATGATATTAAAAAACAAAATGAGGAGCTTAAAAAGATAGAAAATGAAGCCAATAAAACTGCTGAAAAGGCTAAATTTACTGCCAAAAAGGCCGAGTTGGAGAAGTACCTCCCATTCCTGAATAGCCTCCAAAAGGAGTACGAGTCC	PX841048	NCBI	https://www.ncbi.nlm.nih.gov/nuccore/PX841048
ET_030	Ethiopia	2019-11-21	Symptomatic	0	F	H03	0.0231214	2449	78.4402	1	100	GAGGAGAAGAAGAAGAAGCTTATAGGCAGCTACAAGTACATCGGTGCATCGATCGACATGGATCTGGCCACCGCGAATGATGGCGTGGCGTACTACAACAAGATGGAGGAGCTCTACAAGACGCACTTGACTGCAGTGAATGAAGAGGTTAAGAAAGTCGAAGCTGATATTAAAAAAGAAGATGATAAGATTAAAAAGATAGAAAATGATACCACTAAAACTACTGAAAAGACCCAATCGATGGCCAAAAAGGCCGAGCTGGAGAAGTACCTCCCGTTCCTGAATAGCCTCCAAAAGGAGTACGAGTCC	PX841052	NCBI	https://www.ncbi.nlm.nih.gov/nuccore/PX841052
ET_031	Ethiopia	2019-09-16	Symptomatic	0	M	H06	0.0245161	444	100	1	100	GAGGAGAAGAAGAAGAAGCTTCTAGGCAGCTACAAGTACATCGGTGCATCGATCGACAAGGATCTGGCCACCGCGAATGATGGCGTGACCTACTACAACAAGATGGGGGAGCTCTACAAGACGCACTTGGATGGAGTGAAAACAGAGATTAAGAAAGTCGAAGATGATATTAAAAAGCAAGATGAGGAACTTAAAAAGATAGAAAATGTTACCAGTAAAACTAGTAAAAAGAACGAATTTATTGCCAAAAAGGCCGAGCTGGAGAAGTACCTCCCGTTCCTGAATAGCCTCCAAAAGGAGTACGAGTCC	PX841051	NCBI	https://www.ncbi.nlm.nih.gov/nuccore/PX841051
ET_032	Ethiopia	2019-12-05	Symptomatic	0	M	H16	0.993145	826	100	1	100	GAGGAGAAGAAGAAGAAGCTTATAGGCAGCTACAAGTACATCGGTGCATCGATCGACAAGGATCTGGCCACCGCGAATGATGGCGTGGCGTACTACAACAAGATGGAGGAGCTCTACAAGACGCACTTGACTGCAGTGAATGAAGAGGTTAAGAAAGTCGAAGCTGATATTAAAAAAGAAGATGATAAGATTAAAAAGATAGAAAATGAAGCCAATAAAACTGCTGAAAAGACCCAATCGATGGCCAAAAAGGCCGAGCTGGAGAAGTACCTCCCGTTCCTGAATAGCCTCCAAAAGGAGTACGAGTCC	PX841045	NCBI	https://www.ncbi.nlm.nih.gov/nuccore/PX841045
ET_033	Ethiopia	2020-03-03	Symptomatic	0	F	H18	0.041841	334	100	1	100	GAGGAGAAGAAGAAGAAGCTTCTAGGCAGCTACAAGTACATCGGTGCATCGATCGACAAGGATCTGGCCACCGCGAATGATGGCGTGGCGTACTACAACAAGATGGAGGAGCTCTACAAGACGCACTTGACTGCAGTGAATGAAGAGGTTAAGAAAGTCGAAGCTGATATTAAAAAAGAAGATGATAAGATTAAAAAGATAGAAAATGATACCACTAAAACTACTGAAAAGACCCAATCGATGGCCAAAAAGGCCGAGCTGGAGAAGTACCTCCCGTTCCTGAATAGCCTCCAAAAGGAGTACGAGTCC	PX841054	NCBI	https://www.ncbi.nlm.nih.gov/nuccore/PX841054
ET_034	Ethiopia	2020-11-18	Symptomatic	0	F	H02	0.0275049	9354	75.1443	2	97.4877	GAGGAGAAGAAGAAGAAGCTTATAGGCAGCTACAAGTACATCGGTGCATCGATCGACAAGGATCTGGCCACCGCGAATGATGGCGTGGCGTACTACAACAAGATGGAGGAGCTCTACAAGACGCACTTGACTGCAGTGAATGCACAGATTAAGAAAGTCGAAGATGATATTAAAAAACAAAATGAGGAGCTTAAAAAGATAGAAAATGAAGCCAATAAAACTGCTGAAAAGGCTAAATTTACTGCCAAAAAGGCCGAGTTGGAGAAGTACCTCCCATTCCTGAATAGCCTCCAAAAGGAGTACGAGTCC	PX841048	NCBI	https://www.ncbi.nlm.nih.gov/nuccore/PX841048
ET_035	Ethiopia	2020-10-31	Symptomatic	0	M	H02	0.0275049	11093	69.7377	2	97.2956	GAGGAGAAGAAGAAGAAGCTTATAGGCAGCTACAAGTACATCGGTGCATCGATCGACAAGGATCTGGCCACCGCGAATGATGGCGTGGCGTACTACAACAAGATGGAGGAGCTCTACAAGACGCACTTGACTGCAGTGAATGCACAGATTAAGAAAGTCGAAGATGATATTAAAAAACAAAATGAGGAGCTTAAAAAGATAGAAAATGAAGCCAATAAAACTGCTGAAAAGGCTAAATTTACTGCCAAAAAGGCCGAGTTGGAGAAGTACCTCCCATTCCTGAATAGCCTCCAAAAGGAGTACGAGTCC	PX841048	NCBI	https://www.ncbi.nlm.nih.gov/nuccore/PX841048
ET_036	Ethiopia	2019-09-16	Symptomatic	0	M	H06	0.0245161	5425	80.682	1	100	GAGGAGAAGAAGAAGAAGCTTCTAGGCAGCTACAAGTACATCGGTGCATCGATCGACAAGGATCTGGCCACCGCGAATGATGGCGTGACCTACTACAACAAGATGGGGGAGCTCTACAAGACGCACTTGGATGGAGTGAAAACAGAGATTAAGAAAGTCGAAGATGATATTAAAAAGCAAGATGAGGAACTTAAAAAGATAGAAAATGTTACCAGTAAAACTAGTAAAAAGAACGAATTTATTGCCAAAAAGGCCGAGCTGGAGAAGTACCTCCCGTTCCTGAATAGCCTCCAAAAGGAGTACGAGTCC	PX841051	NCBI	https://www.ncbi.nlm.nih.gov/nuccore/PX841051
ET_037	Ethiopia	2021-03-16	Symptomatic	0	F	H01	0.00892495	4882	65.5879	2	87.8124	GAGGAGAAGAAGAAGAAGCTTATAGGCAGCTACAAGTACATCGGTGCATCGATCGACATGGATCTGGCCACCGCGAATGATGGCGTGGCGTACTACAACAAGATGGAGGAGCTCTACAAGACGCACTTGGATGGAGTGAAAACAGAGATTAAGAAAGTCGAAGATGATATTAAAAAACATGATGAGAAGCTTAAAAAGATAGAAAATGAAGCCAGTAAAACTAGTGAAAAGACCCAATTGAATGCCAAAAAGGCCGAGCTGGAGAAGTACCTCCCGTTCCTGAATAGCCTCCAAAAGGAGTACGAGTCC	PX841046	NCBI	https://www.ncbi.nlm.nih.gov/nuccore/PX841046
ET_038	Ethiopia	2021-01-13	Symptomatic	0	M	H02	0.0275049	3198	79.6123	1	100	GAGGAGAAGAAGAAGAAGCTTATAGGCAGCTACAAGTACATCGGTGCATCGATCGACAAGGATCTGGCCACCGCGAATGATGGCGTGGCGTACTACAACAAGATGGAGGAGCTCTACAAGACGCACTTGACTGCAGTGAATGCACAGATTAAGAAAGTCGAAGATGATATTAAAAAACAAAATGAGGAGCTTAAAAAGATAGAAAATGAAGCCAATAAAACTGCTGAAAAGGCTAAATTTACTGCCAAAAAGGCCGAGTTGGAGAAGTACCTCCCATTCCTGAATAGCCTCCAAAAGGAGTACGAGTCC	PX841048	NCBI	https://www.ncbi.nlm.nih.gov/nuccore/PX841048
ET_039	Ethiopia	2021-06-08	Symptomatic	0	M	H38	0.751195	8790	46.9397	2	75.1195	GAGGAGAAGAAGAAGAAGATTATAGGCAGCTACAAGTACATCGGTGCATCGATCGACAAGGATCTGGCCACCGCGAATGATGGCGTGGCGTACTACAACAAGATGGAGGAGCTCTACAAGACGCACTTGACTGCAGTGAATGCACAGATTAAGAAAGTCGAAGATGATATTAAAAAACAAAATGAGGAGCTTAAAAAGATAGAAAATGAAGCCAATAAAACTGCTGAAAAGGCTAAATTTACTGCCAAAAAGGCCGAGTTGGAGAAGTACCTCCCATTCCTGAATAGCCTCCAAAAGGAGTACGAGTCC	PX841055	NCBI	https://www.ncbi.nlm.nih.gov/nuccore/PX841055
ET_040	Ethiopia	2020-09-17	Symptomatic	0	F	H01	0.00892495	3444	66.3763	1	100	GAGGAGAAGAAGAAGAAGCTTATAGGCAGCTACAAGTACATCGGTGCATCGATCGACATGGATCTGGCCACCGCGAATGATGGCGTGGCGTACTACAACAAGATGGAGGAGCTCTACAAGACGCACTTGGATGGAGTGAAAACAGAGATTAAGAAAGTCGAAGATGATATTAAAAAACATGATGAGAAGCTTAAAAAGATAGAAAATGAAGCCAGTAAAACTAGTGAAAAGACCCAATTGAATGCCAAAAAGGCCGAGCTGGAGAAGTACCTCCCGTTCCTGAATAGCCTCCAAAAGGAGTACGAGTCC	PX841046	NCBI	https://www.ncbi.nlm.nih.gov/nuccore/PX841046
ET_041	Ethiopia	2020-08-25	Symptomatic	0	M	H02	0.0275049	2489	75.7332	1	100	GAGGAGAAGAAGAAGAAGCTTATAGGCAGCTACAAGTACATCGGTGCATCGATCGACAAGGATCTGGCCACCGCGAATGATGGCGTGGCGTACTACAACAAGATGGAGGAGCTCTACAAGACGCACTTGACTGCAGTGAATGCACAGATTAAGAAAGTCGAAGATGATATTAAAAAACAAAATGAGGAGCTTAAAAAGATAGAAAATGAAGCCAATAAAACTGCTGAAAAGGCTAAATTTACTGCCAAAAAGGCCGAGTTGGAGAAGTACCTCCCATTCCTGAATAGCCTCCAAAAGGAGTACGAGTCC	PX841048	NCBI	https://www.ncbi.nlm.nih.gov/nuccore/PX841048
ET_042	Ethiopia	2020-10-26	Symptomatic	0	M	H06	0.0245161	8185	58.2651	2	87.135	GAGGAGAAGAAGAAGAAGCTTCTAGGCAGCTACAAGTACATCGGTGCATCGATCGACAAGGATCTGGCCACCGCGAATGATGGCGTGACCTACTACAACAAGATGGGGGAGCTCTACAAGACGCACTTGGATGGAGTGAAAACAGAGATTAAGAAAGTCGAAGATGATATTAAAAAGCAAGATGAGGAACTTAAAAAGATAGAAAATGTTACCAGTAAAACTAGTAAAAAGAACGAATTTATTGCCAAAAAGGCCGAGCTGGAGAAGTACCTCCCGTTCCTGAATAGCCTCCAAAAGGAGTACGAGTCC	PX841051	NCBI	https://www.ncbi.nlm.nih.gov/nuccore/PX841051
ET_043	Ethiopia	2020-10-30	Symptomatic	0	M	H02	0.0275049	10218	64.3081	2	91.378	GAGGAGAAGAAGAAGAAGCTTATAGGCAGCTACAAGTACATCGGTGCATCGATCGACAAGGATCTGGCCACCGCGAATGATGGCGTGGCGTACTACAACAAGATGGAGGAGCTCTACAAGACGCACTTGACTGCAGTGAATGCACAGATTAAGAAAGTCGAAGATGATATTAAAAAACAAAATGAGGAGCTTAAAAAGATAGAAAATGAAGCCAATAAAACTGCTGAAAAGGCTAAATTTACTGCCAAAAAGGCCGAGTTGGAGAAGTACCTCCCATTCCTGAATAGCCTCCAAAAGGAGTACGAGTCC	PX841048	NCBI	https://www.ncbi.nlm.nih.gov/nuccore/PX841048
ET_044	Ethiopia	2020-10-22	Symptomatic	0	F	H06	0.0245161	14507	70.559	1	100	GAGGAGAAGAAGAAGAAGCTTCTAGGCAGCTACAAGTACATCGGTGCATCGATCGACAAGGATCTGGCCACCGCGAATGATGGCGTGACCTACTACAACAAGATGGGGGAGCTCTACAAGACGCACTTGGATGGAGTGAAAACAGAGATTAAGAAAGTCGAAGATGATATTAAAAAGCAAGATGAGGAACTTAAAAAGATAGAAAATGTTACCAGTAAAACTAGTAAAAAGAACGAATTTATTGCCAAAAAGGCCGAGCTGGAGAAGTACCTCCCGTTCCTGAATAGCCTCCAAAAGGAGTACGAGTCC	PX841051	NCBI	https://www.ncbi.nlm.nih.gov/nuccore/PX841051
ET_045	Ethiopia	2020-10-26	Symptomatic	0	F	H02	0.0275049	13630	65.8401	2	96.361	GAGGAGAAGAAGAAGAAGCTTATAGGCAGCTACAAGTACATCGGTGCATCGATCGACAAGGATCTGGCCACCGCGAATGATGGCGTGGCGTACTACAACAAGATGGAGGAGCTCTACAAGACGCACTTGACTGCAGTGAATGCACAGATTAAGAAAGTCGAAGATGATATTAAAAAACAAAATGAGGAGCTTAAAAAGATAGAAAATGAAGCCAATAAAACTGCTGAAAAGGCTAAATTTACTGCCAAAAAGGCCGAGTTGGAGAAGTACCTCCCATTCCTGAATAGCCTCCAAAAGGAGTACGAGTCC	PX841048	NCBI	https://www.ncbi.nlm.nih.gov/nuccore/PX841048
ET_046	Ethiopia	2020-02-25	Symptomatic	0	M	H03	0.0231214	19656	74.4302	2	97.675	GAGGAGAAGAAGAAGAAGCTTATAGGCAGCTACAAGTACATCGGTGCATCGATCGACATGGATCTGGCCACCGCGAATGATGGCGTGGCGTACTACAACAAGATGGAGGAGCTCTACAAGACGCACTTGACTGCAGTGAATGAAGAGGTTAAGAAAGTCGAAGCTGATATTAAAAAAGAAGATGATAAGATTAAAAAGATAGAAAATGATACCACTAAAACTACTGAAAAGACCCAATCGATGGCCAAAAAGGCCGAGCTGGAGAAGTACCTCCCGTTCCTGAATAGCCTCCAAAAGGAGTACGAGTCC	PX841052	NCBI	https://www.ncbi.nlm.nih.gov/nuccore/PX841052
ET_047	Ethiopia	2021-05-28	Symptomatic	0	M	H01	0.00892495	8023	76.5674	1	100	GAGGAGAAGAAGAAGAAGCTTATAGGCAGCTACAAGTACATCGGTGCATCGATCGACATGGATCTGGCCACCGCGAATGATGGCGTGGCGTACTACAACAAGATGGAGGAGCTCTACAAGACGCACTTGGATGGAGTGAAAACAGAGATTAAGAAAGTCGAAGATGATATTAAAAAACATGATGAGAAGCTTAAAAAGATAGAAAATGAAGCCAGTAAAACTAGTGAAAAGACCCAATTGAATGCCAAAAAGGCCGAGCTGGAGAAGTACCTCCCGTTCCTGAATAGCCTCCAAAAGGAGTACGAGTCC	PX841046	NCBI	https://www.ncbi.nlm.nih.gov/nuccore/PX841046
ET_048	Ethiopia	2021-06-29	Symptomatic	0	M	H11	0.500697	10466	66.845	3	87.8273	GAGGAGAAGAAGAAGAAGCTTCTAGGCAGCTACAAGTACATCGGTGCATCGATCGACAAGGATCTGGCCACCGCGAATGATGGCGTGGCGTACTACAACAAGATGGAGGAGCTCTACAAGACGCACTTGACTGCAGTGAATGAAGAGGTTAAGAAAGTCGAAGCTGATATTAAAAAAGAAGATGATAAGATTAAAAAGATAGAAAATGAAGCCAATAAAACTGCTGAAAAGACCCAATCGATGGCCAAAAAGGCCGAGCTGGAGAAGTACCTCCCGTTCCTGAATAGCCTCCAAAAGGAGTACGAGTCC	PX841047	NCBI	https://www.ncbi.nlm.nih.gov/nuccore/PX841047
ET_049	Ethiopia	2021-01-03	Symptomatic	0	M	H11	0.500697	6453	38.3233	4	50.0697	GAGGAGAAGAAGAAGAAGCTTCTAGGCAGCTACAAGTACATCGGTGCATCGATCGACAAGGATCTGGCCACCGCGAATGATGGCGTGGCGTACTACAACAAGATGGAGGAGCTCTACAAGACGCACTTGACTGCAGTGAATGAAGAGGTTAAGAAAGTCGAAGCTGATATTAAAAAAGAAGATGATAAGATTAAAAAGATAGAAAATGAAGCCAATAAAACTGCTGAAAAGACCCAATCGATGGCCAAAAAGGCCGAGCTGGAGAAGTACCTCCCGTTCCTGAATAGCCTCCAAAAGGAGTACGAGTCC	PX841047	NCBI	https://www.ncbi.nlm.nih.gov/nuccore/PX841047
ET_050	Ethiopia	2021-06-10	Symptomatic	0	M	H01	0.00892495	7530	74.5153	1	100	GAGGAGAAGAAGAAGAAGCTTATAGGCAGCTACAAGTACATCGGTGCATCGATCGACATGGATCTGGCCACCGCGAATGATGGCGTGGCGTACTACAACAAGATGGAGGAGCTCTACAAGACGCACTTGGATGGAGTGAAAACAGAGATTAAGAAAGTCGAAGATGATATTAAAAAACATGATGAGAAGCTTAAAAAGATAGAAAATGAAGCCAGTAAAACTAGTGAAAAGACCCAATTGAATGCCAAAAAGGCCGAGCTGGAGAAGTACCTCCCGTTCCTGAATAGCCTCCAAAAGGAGTACGAGTCC	PX841046	NCBI	https://www.ncbi.nlm.nih.gov/nuccore/PX841046
ET_051	Ethiopia	2021-06-28	Symptomatic	0	M	H01	0.00892495	7736	75.711	1	100	GAGGAGAAGAAGAAGAAGCTTATAGGCAGCTACAAGTACATCGGTGCATCGATCGACATGGATCTGGCCACCGCGAATGATGGCGTGGCGTACTACAACAAGATGGAGGAGCTCTACAAGACGCACTTGGATGGAGTGAAAACAGAGATTAAGAAAGTCGAAGATGATATTAAAAAACATGATGAGAAGCTTAAAAAGATAGAAAATGAAGCCAGTAAAACTAGTGAAAAGACCCAATTGAATGCCAAAAAGGCCGAGCTGGAGAAGTACCTCCCGTTCCTGAATAGCCTCCAAAAGGAGTACGAGTCC	PX841046	NCBI	https://www.ncbi.nlm.nih.gov/nuccore/PX841046
ET_052	Ethiopia	2021-05-24	Symptomatic	0	M	H02	0.0275049	6797	76.5779	2	97.44	GAGGAGAAGAAGAAGAAGCTTATAGGCAGCTACAAGTACATCGGTGCATCGATCGACAAGGATCTGGCCACCGCGAATGATGGCGTGGCGTACTACAACAAGATGGAGGAGCTCTACAAGACGCACTTGACTGCAGTGAATGCACAGATTAAGAAAGTCGAAGATGATATTAAAAAACAAAATGAGGAGCTTAAAAAGATAGAAAATGAAGCCAATAAAACTGCTGAAAAGGCTAAATTTACTGCCAAAAAGGCCGAGTTGGAGAAGTACCTCCCATTCCTGAATAGCCTCCAAAAGGAGTACGAGTCC	PX841048	NCBI	https://www.ncbi.nlm.nih.gov/nuccore/PX841048
ET_053	Ethiopia	2021-04-15	Symptomatic	0	M	H02	0.0275049	7859	74.8696	2	97.9259	GAGGAGAAGAAGAAGAAGCTTATAGGCAGCTACAAGTACATCGGTGCATCGATCGACAAGGATCTGGCCACCGCGAATGATGGCGTGGCGTACTACAACAAGATGGAGGAGCTCTACAAGACGCACTTGACTGCAGTGAATGCACAGATTAAGAAAGTCGAAGATGATATTAAAAAACAAAATGAGGAGCTTAAAAAGATAGAAAATGAAGCCAATAAAACTGCTGAAAAGGCTAAATTTACTGCCAAAAAGGCCGAGTTGGAGAAGTACCTCCCATTCCTGAATAGCCTCCAAAAGGAGTACGAGTCC	PX841048	NCBI	https://www.ncbi.nlm.nih.gov/nuccore/PX841048
ET_054	Ethiopia	2021-07-20	Symptomatic	0	M	H02	0.0275049	3249	70.0215	1	100	GAGGAGAAGAAGAAGAAGCTTATAGGCAGCTACAAGTACATCGGTGCATCGATCGACAAGGATCTGGCCACCGCGAATGATGGCGTGGCGTACTACAACAAGATGGAGGAGCTCTACAAGACGCACTTGACTGCAGTGAATGCACAGATTAAGAAAGTCGAAGATGATATTAAAAAACAAAATGAGGAGCTTAAAAAGATAGAAAATGAAGCCAATAAAACTGCTGAAAAGGCTAAATTTACTGCCAAAAAGGCCGAGTTGGAGAAGTACCTCCCATTCCTGAATAGCCTCCAAAAGGAGTACGAGTCC	PX841048	NCBI	https://www.ncbi.nlm.nih.gov/nuccore/PX841048
ET_055	Ethiopia	2020-11-10	Symptomatic	0	M	H01	0.00892495	16348	71.3482	2	97.2046	GAGGAGAAGAAGAAGAAGCTTATAGGCAGCTACAAGTACATCGGTGCATCGATCGACATGGATCTGGCCACCGCGAATGATGGCGTGGCGTACTACAACAAGATGGAGGAGCTCTACAAGACGCACTTGGATGGAGTGAAAACAGAGATTAAGAAAGTCGAAGATGATATTAAAAAACATGATGAGAAGCTTAAAAAGATAGAAAATGAAGCCAGTAAAACTAGTGAAAAGACCCAATTGAATGCCAAAAAGGCCGAGCTGGAGAAGTACCTCCCGTTCCTGAATAGCCTCCAAAAGGAGTACGAGTCC	PX841046	NCBI	https://www.ncbi.nlm.nih.gov/nuccore/PX841046
ET_056	Ethiopia	2020-10-08	Symptomatic	0	M	H01	0.00892495	9370	70.2028	1	100	GAGGAGAAGAAGAAGAAGCTTATAGGCAGCTACAAGTACATCGGTGCATCGATCGACATGGATCTGGCCACCGCGAATGATGGCGTGGCGTACTACAACAAGATGGAGGAGCTCTACAAGACGCACTTGGATGGAGTGAAAACAGAGATTAAGAAAGTCGAAGATGATATTAAAAAACATGATGAGAAGCTTAAAAAGATAGAAAATGAAGCCAGTAAAACTAGTGAAAAGACCCAATTGAATGCCAAAAAGGCCGAGCTGGAGAAGTACCTCCCGTTCCTGAATAGCCTCCAAAAGGAGTACGAGTCC	PX841046	NCBI	https://www.ncbi.nlm.nih.gov/nuccore/PX841046
ET_057	Ethiopia	2020-10-14	Symptomatic	0	F	H02	0.0275049	8046	75.1926	1	100	GAGGAGAAGAAGAAGAAGCTTATAGGCAGCTACAAGTACATCGGTGCATCGATCGACAAGGATCTGGCCACCGCGAATGATGGCGTGGCGTACTACAACAAGATGGAGGAGCTCTACAAGACGCACTTGACTGCAGTGAATGCACAGATTAAGAAAGTCGAAGATGATATTAAAAAACAAAATGAGGAGCTTAAAAAGATAGAAAATGAAGCCAATAAAACTGCTGAAAAGGCTAAATTTACTGCCAAAAAGGCCGAGTTGGAGAAGTACCTCCCATTCCTGAATAGCCTCCAAAAGGAGTACGAGTCC	PX841048	NCBI	https://www.ncbi.nlm.nih.gov/nuccore/PX841048
ET_058	Ethiopia	2020-10-27	Symptomatic	0	F	H02	0.0275049	5946	71.1066	1	100	GAGGAGAAGAAGAAGAAGCTTATAGGCAGCTACAAGTACATCGGTGCATCGATCGACAAGGATCTGGCCACCGCGAATGATGGCGTGGCGTACTACAACAAGATGGAGGAGCTCTACAAGACGCACTTGACTGCAGTGAATGCACAGATTAAGAAAGTCGAAGATGATATTAAAAAACAAAATGAGGAGCTTAAAAAGATAGAAAATGAAGCCAATAAAACTGCTGAAAAGGCTAAATTTACTGCCAAAAAGGCCGAGTTGGAGAAGTACCTCCCATTCCTGAATAGCCTCCAAAAGGAGTACGAGTCC	PX841048	NCBI	https://www.ncbi.nlm.nih.gov/nuccore/PX841048
ET_059	Ethiopia	2021-01-03	Symptomatic	0	M	H01	0.00892495	11838	40.8937	2	53.531	GAGGAGAAGAAGAAGAAGCTTATAGGCAGCTACAAGTACATCGGTGCATCGATCGACATGGATCTGGCCACCGCGAATGATGGCGTGGCGTACTACAACAAGATGGAGGAGCTCTACAAGACGCACTTGGATGGAGTGAAAACAGAGATTAAGAAAGTCGAAGATGATATTAAAAAACATGATGAGAAGCTTAAAAAGATAGAAAATGAAGCCAGTAAAACTAGTGAAAAGACCCAATTGAATGCCAAAAAGGCCGAGCTGGAGAAGTACCTCCCGTTCCTGAATAGCCTCCAAAAGGAGTACGAGTCC	PX841046	NCBI	https://www.ncbi.nlm.nih.gov/nuccore/PX841046
ET_060	Ethiopia	2019-12-13	Symptomatic	0	M	H02	0.0275049	20052	70.7361	1	100	GAGGAGAAGAAGAAGAAGCTTATAGGCAGCTACAAGTACATCGGTGCATCGATCGACAAGGATCTGGCCACCGCGAATGATGGCGTGGCGTACTACAACAAGATGGAGGAGCTCTACAAGACGCACTTGACTGCAGTGAATGCACAGATTAAGAAAGTCGAAGATGATATTAAAAAACAAAATGAGGAGCTTAAAAAGATAGAAAATGAAGCCAATAAAACTGCTGAAAAGGCTAAATTTACTGCCAAAAAGGCCGAGTTGGAGAAGTACCTCCCATTCCTGAATAGCCTCCAAAAGGAGTACGAGTCC	PX841048	NCBI	https://www.ncbi.nlm.nih.gov/nuccore/PX841048
ET_061	Ethiopia	2020-02-24	Symptomatic	0	M	H09	0.894651	5587	69.9302	1	100	GAGGAGAAGAAGAAGAAGCTTATAGGCAGCTACAAGTACATCGGTGCATCGATCGACAAGGATCTGGCCACCGCGAATGATGGCGTGGCGTACTACAACAAGATGGAGGAGCTCTACAAGACGCACTTGACTGCAGTGAATGCACAGATTAAGAAAGTCGAAGATGATATTAAAAAACAAAATGAGGAGCTTAAAAAGATAGAAAATGAAGCCAATAAAACTGCTGAAAAGGCTAAATTTACTGCCAAAAAGGCCGAGCTGGAGAAGTACCTCCCGTTCCTGAATAGCCTCCAAAAGGAGTACGAGTCC	PX841053	NCBI	https://www.ncbi.nlm.nih.gov/nuccore/PX841053
ET_062	Ethiopia	2020-02-05	Symptomatic	0	M	H06	0.0245161	4016	71.1653	1	100	GAGGAGAAGAAGAAGAAGCTTCTAGGCAGCTACAAGTACATCGGTGCATCGATCGACAAGGATCTGGCCACCGCGAATGATGGCGTGACCTACTACAACAAGATGGGGGAGCTCTACAAGACGCACTTGGATGGAGTGAAAACAGAGATTAAGAAAGTCGAAGATGATATTAAAAAGCAAGATGAGGAACTTAAAAAGATAGAAAATGTTACCAGTAAAACTAGTAAAAAGAACGAATTTATTGCCAAAAAGGCCGAGCTGGAGAAGTACCTCCCGTTCCTGAATAGCCTCCAAAAGGAGTACGAGTCC	PX841051	NCBI	https://www.ncbi.nlm.nih.gov/nuccore/PX841051
ET_063	Ethiopia	2019-12-13	Symptomatic	0	M	H02	0.0275049	4324	77.5671	1	100	GAGGAGAAGAAGAAGAAGCTTATAGGCAGCTACAAGTACATCGGTGCATCGATCGACAAGGATCTGGCCACCGCGAATGATGGCGTGGCGTACTACAACAAGATGGAGGAGCTCTACAAGACGCACTTGACTGCAGTGAATGCACAGATTAAGAAAGTCGAAGATGATATTAAAAAACAAAATGAGGAGCTTAAAAAGATAGAAAATGAAGCCAATAAAACTGCTGAAAAGGCTAAATTTACTGCCAAAAAGGCCGAGTTGGAGAAGTACCTCCCATTCCTGAATAGCCTCCAAAAGGAGTACGAGTCC	PX841048	NCBI	https://www.ncbi.nlm.nih.gov/nuccore/PX841048
ET_064	Ethiopia	2020-08-28	Symptomatic	0	M	H43	1	8032	67.2809	1	100	GAGGAGAAGAAGAAGAAGCTTCTAGGCAGCTACAAGTACATCGGTGCATCGATCGACAAGGATCTGGCCACCGCGAATGATGGCGTGACCTACTACAACAAGATGGGGGAGCTCTACAAGACGCACTTGGATGGAGTGAAAACAGAGATTAAGAAAGTCGAAGATGATATTAAAAAGCAAGATGAGGAACTTAAAAAGATAGAAAATGTTACCAGTAAAACTAGTAAAAAGAACGAATTTATTGCCAAAAAGGCCGAACTGGAGAAGTACCTCCCGTTCCTGAATAGCCTCCAAAAGGAGTACGAGTCC	PX841056	NCBI	https://www.ncbi.nlm.nih.gov/nuccore/PX841056
ET_065	Ethiopia	2020-07-17	Symptomatic	0	F	H01	0.00892495	5321	70.9265	1	100	GAGGAGAAGAAGAAGAAGCTTATAGGCAGCTACAAGTACATCGGTGCATCGATCGACATGGATCTGGCCACCGCGAATGATGGCGTGGCGTACTACAACAAGATGGAGGAGCTCTACAAGACGCACTTGGATGGAGTGAAAACAGAGATTAAGAAAGTCGAAGATGATATTAAAAAACATGATGAGAAGCTTAAAAAGATAGAAAATGAAGCCAGTAAAACTAGTGAAAAGACCCAATTGAATGCCAAAAAGGCCGAGCTGGAGAAGTACCTCCCGTTCCTGAATAGCCTCCAAAAGGAGTACGAGTCC	PX841046	NCBI	https://www.ncbi.nlm.nih.gov/nuccore/PX841046
ET_066	Ethiopia	2020-09-28	Symptomatic	0	M	H01	0.00892495	6074	76.9674	1	100	GAGGAGAAGAAGAAGAAGCTTATAGGCAGCTACAAGTACATCGGTGCATCGATCGACATGGATCTGGCCACCGCGAATGATGGCGTGGCGTACTACAACAAGATGGAGGAGCTCTACAAGACGCACTTGGATGGAGTGAAAACAGAGATTAAGAAAGTCGAAGATGATATTAAAAAACATGATGAGAAGCTTAAAAAGATAGAAAATGAAGCCAGTAAAACTAGTGAAAAGACCCAATTGAATGCCAAAAAGGCCGAGCTGGAGAAGTACCTCCCGTTCCTGAATAGCCTCCAAAAGGAGTACGAGTCC	PX841046	NCBI	https://www.ncbi.nlm.nih.gov/nuccore/PX841046
ET_067	Ethiopia	2020-03-18	Symptomatic	0	M	H02	0.0275049	4460	75.8969	1	100	GAGGAGAAGAAGAAGAAGCTTATAGGCAGCTACAAGTACATCGGTGCATCGATCGACAAGGATCTGGCCACCGCGAATGATGGCGTGGCGTACTACAACAAGATGGAGGAGCTCTACAAGACGCACTTGACTGCAGTGAATGCACAGATTAAGAAAGTCGAAGATGATATTAAAAAACAAAATGAGGAGCTTAAAAAGATAGAAAATGAAGCCAATAAAACTGCTGAAAAGGCTAAATTTACTGCCAAAAAGGCCGAGTTGGAGAAGTACCTCCCATTCCTGAATAGCCTCCAAAAGGAGTACGAGTCC	PX841048	NCBI	https://www.ncbi.nlm.nih.gov/nuccore/PX841048
ET_068	Ethiopia	2020-10-08	Symptomatic	0	F	H01	0.00892495	1858	36.1679	2	61.0872	GAGGAGAAGAAGAAGAAGCTTATAGGCAGCTACAAGTACATCGGTGCATCGATCGACATGGATCTGGCCACCGCGAATGATGGCGTGGCGTACTACAACAAGATGGAGGAGCTCTACAAGACGCACTTGGATGGAGTGAAAACAGAGATTAAGAAAGTCGAAGATGATATTAAAAAACATGATGAGAAGCTTAAAAAGATAGAAAATGAAGCCAGTAAAACTAGTGAAAAGACCCAATTGAATGCCAAAAAGGCCGAGCTGGAGAAGTACCTCCCGTTCCTGAATAGCCTCCAAAAGGAGTACGAGTCC	PX841046	NCBI	https://www.ncbi.nlm.nih.gov/nuccore/PX841046
ET_069	Ethiopia	2021-01-28	Symptomatic	0	M	H02	0.0275049	3980	79.9749	1	100	GAGGAGAAGAAGAAGAAGCTTATAGGCAGCTACAAGTACATCGGTGCATCGATCGACAAGGATCTGGCCACCGCGAATGATGGCGTGGCGTACTACAACAAGATGGAGGAGCTCTACAAGACGCACTTGACTGCAGTGAATGCACAGATTAAGAAAGTCGAAGATGATATTAAAAAACAAAATGAGGAGCTTAAAAAGATAGAAAATGAAGCCAATAAAACTGCTGAAAAGGCTAAATTTACTGCCAAAAAGGCCGAGTTGGAGAAGTACCTCCCATTCCTGAATAGCCTCCAAAAGGAGTACGAGTCC	PX841048	NCBI	https://www.ncbi.nlm.nih.gov/nuccore/PX841048
ET_070	Ethiopia	2020-02-24	Symptomatic	0	M	H02	0.0275049	5208	74.328	1	100	GAGGAGAAGAAGAAGAAGCTTATAGGCAGCTACAAGTACATCGGTGCATCGATCGACAAGGATCTGGCCACCGCGAATGATGGCGTGGCGTACTACAACAAGATGGAGGAGCTCTACAAGACGCACTTGACTGCAGTGAATGCACAGATTAAGAAAGTCGAAGATGATATTAAAAAACAAAATGAGGAGCTTAAAAAGATAGAAAATGAAGCCAATAAAACTGCTGAAAAGGCTAAATTTACTGCCAAAAAGGCCGAGTTGGAGAAGTACCTCCCATTCCTGAATAGCCTCCAAAAGGAGTACGAGTCC	PX841048	NCBI	https://www.ncbi.nlm.nih.gov/nuccore/PX841048
ET_071	Ethiopia	2020-10-06	Symptomatic	0	F	H08	0.487496	1556	100	1	100	GAGGAGAAGAAGAAGAAGCTTATAGGCAGCTACAAGTACATCGGTGCATCGATCGACATGGATCTGGCCACCGCGAATGATGGCGTGGCGTACTACAACAAGATGGAGGAGCTCTACAAGACGCACTTGACTGCAGTGAATGCACAGATTAAGAAAGTCGAAGATGATATTAAAAAACAAAATGAGGAGCTTAAAAAGATAGAAAATGATACCACTAAAACTACTGAAAAGGCTAAATTTACTGCCAAAAAGGCCGAGCTGGAGAAGTACCTCCCGTTCCTGAATAGCCTCCAAAAGGAGTACGAGTCC	PX841057	NCBI	https://www.ncbi.nlm.nih.gov/nuccore/PX841057
ET_072	Ethiopia	2020-10-06	Symptomatic	0	M	H01	0.00892495	6124	63.9941	1	100	GAGGAGAAGAAGAAGAAGCTTATAGGCAGCTACAAGTACATCGGTGCATCGATCGACATGGATCTGGCCACCGCGAATGATGGCGTGGCGTACTACAACAAGATGGAGGAGCTCTACAAGACGCACTTGGATGGAGTGAAAACAGAGATTAAGAAAGTCGAAGATGATATTAAAAAACATGATGAGAAGCTTAAAAAGATAGAAAATGAAGCCAGTAAAACTAGTGAAAAGACCCAATTGAATGCCAAAAAGGCCGAGCTGGAGAAGTACCTCCCGTTCCTGAATAGCCTCCAAAAGGAGTACGAGTCC	PX841046	NCBI	https://www.ncbi.nlm.nih.gov/nuccore/PX841046
ET_073	Ethiopia	2021-05-26	Symptomatic	0	M	H02	0.0275049	8705	73.9115	1	100	GAGGAGAAGAAGAAGAAGCTTATAGGCAGCTACAAGTACATCGGTGCATCGATCGACAAGGATCTGGCCACCGCGAATGATGGCGTGGCGTACTACAACAAGATGGAGGAGCTCTACAAGACGCACTTGACTGCAGTGAATGCACAGATTAAGAAAGTCGAAGATGATATTAAAAAACAAAATGAGGAGCTTAAAAAGATAGAAAATGAAGCCAATAAAACTGCTGAAAAGGCTAAATTTACTGCCAAAAAGGCCGAGTTGGAGAAGTACCTCCCATTCCTGAATAGCCTCCAAAAGGAGTACGAGTCC	PX841048	NCBI	https://www.ncbi.nlm.nih.gov/nuccore/PX841048
ET_075	Ethiopia	2021-07-05	Symptomatic	0	M	H01	0.00892495	2758	73.9666	1	100	GAGGAGAAGAAGAAGAAGCTTATAGGCAGCTACAAGTACATCGGTGCATCGATCGACATGGATCTGGCCACCGCGAATGATGGCGTGGCGTACTACAACAAGATGGAGGAGCTCTACAAGACGCACTTGGATGGAGTGAAAACAGAGATTAAGAAAGTCGAAGATGATATTAAAAAACATGATGAGAAGCTTAAAAAGATAGAAAATGAAGCCAGTAAAACTAGTGAAAAGACCCAATTGAATGCCAAAAAGGCCGAGCTGGAGAAGTACCTCCCGTTCCTGAATAGCCTCCAAAAGGAGTACGAGTCC	PX841046	NCBI	https://www.ncbi.nlm.nih.gov/nuccore/PX841046
ET_076	Ethiopia	2021-06-10	Symptomatic	0	M	H02	0.0275049	10032	73.1061	2	98.6842	GAGGAGAAGAAGAAGAAGCTTATAGGCAGCTACAAGTACATCGGTGCATCGATCGACAAGGATCTGGCCACCGCGAATGATGGCGTGGCGTACTACAACAAGATGGAGGAGCTCTACAAGACGCACTTGACTGCAGTGAATGCACAGATTAAGAAAGTCGAAGATGATATTAAAAAACAAAATGAGGAGCTTAAAAAGATAGAAAATGAAGCCAATAAAACTGCTGAAAAGGCTAAATTTACTGCCAAAAAGGCCGAGTTGGAGAAGTACCTCCCATTCCTGAATAGCCTCCAAAAGGAGTACGAGTCC	PX841048	NCBI	https://www.ncbi.nlm.nih.gov/nuccore/PX841048
ET_077	Ethiopia	2021-07-29	Symptomatic	0	M	H07	0.0637647	7341	77.9594	1	100	GAGGAGAAGAAGAAGAAGCTTCTAGGCAGCTACAAGTACATCGGTGCATCGATCGACAAGGATCTGGCCACCGCGAATGATGGCGTGGCGTACTACAACAAGATGGAGGAGCTCTACAAGACGCACTTGACTGCAGTGAATGCACAGATTAAGAAAGTCGAAGATGATATTAAAAAGCAAGATGAGGAGCTTAAAAAGATAGAAAATGAAGCCAATAAAACTGCTGAAAAGGCTAAATTTACTGCCAAAAAGGCCGAGTTGGAGAAGTACCTCCCATTCCTGAATAGCCTCCAAAAGGAGTACGAGTCC	PX841049	NCBI	https://www.ncbi.nlm.nih.gov/nuccore/PX841049
ET_078	Ethiopia	2021-06-22	Symptomatic	0	M	H01	0.00892495	7598	73.1377	1	100	GAGGAGAAGAAGAAGAAGCTTATAGGCAGCTACAAGTACATCGGTGCATCGATCGACATGGATCTGGCCACCGCGAATGATGGCGTGGCGTACTACAACAAGATGGAGGAGCTCTACAAGACGCACTTGGATGGAGTGAAAACAGAGATTAAGAAAGTCGAAGATGATATTAAAAAACATGATGAGAAGCTTAAAAAGATAGAAAATGAAGCCAGTAAAACTAGTGAAAAGACCCAATTGAATGCCAAAAAGGCCGAGCTGGAGAAGTACCTCCCGTTCCTGAATAGCCTCCAAAAGGAGTACGAGTCC	PX841046	NCBI	https://www.ncbi.nlm.nih.gov/nuccore/PX841046
ET_079	Ethiopia	2021-07-27	Symptomatic	0	M	H03	0.0231214	2659	67.9203	1	100	GAGGAGAAGAAGAAGAAGCTTATAGGCAGCTACAAGTACATCGGTGCATCGATCGACATGGATCTGGCCACCGCGAATGATGGCGTGGCGTACTACAACAAGATGGAGGAGCTCTACAAGACGCACTTGACTGCAGTGAATGAAGAGGTTAAGAAAGTCGAAGCTGATATTAAAAAAGAAGATGATAAGATTAAAAAGATAGAAAATGATACCACTAAAACTACTGAAAAGACCCAATCGATGGCCAAAAAGGCCGAGCTGGAGAAGTACCTCCCGTTCCTGAATAGCCTCCAAAAGGAGTACGAGTCC	PX841052	NCBI	https://www.ncbi.nlm.nih.gov/nuccore/PX841052
ET_080	Ethiopia	2021-07-28	Symptomatic	0	M	H07	0.0637647	1945	74.2416	1	100	GAGGAGAAGAAGAAGAAGCTTCTAGGCAGCTACAAGTACATCGGTGCATCGATCGACAAGGATCTGGCCACCGCGAATGATGGCGTGGCGTACTACAACAAGATGGAGGAGCTCTACAAGACGCACTTGACTGCAGTGAATGCACAGATTAAGAAAGTCGAAGATGATATTAAAAAGCAAGATGAGGAGCTTAAAAAGATAGAAAATGAAGCCAATAAAACTGCTGAAAAGGCTAAATTTACTGCCAAAAAGGCCGAGTTGGAGAAGTACCTCCCATTCCTGAATAGCCTCCAAAAGGAGTACGAGTCC	PX841049	NCBI	https://www.ncbi.nlm.nih.gov/nuccore/PX841049
ET_081	Ethiopia	2021-07-19	Symptomatic	0	M	H02	0.0275049	1956	73.3129	2	93.3538	GAGGAGAAGAAGAAGAAGCTTATAGGCAGCTACAAGTACATCGGTGCATCGATCGACAAGGATCTGGCCACCGCGAATGATGGCGTGGCGTACTACAACAAGATGGAGGAGCTCTACAAGACGCACTTGACTGCAGTGAATGCACAGATTAAGAAAGTCGAAGATGATATTAAAAAACAAAATGAGGAGCTTAAAAAGATAGAAAATGAAGCCAATAAAACTGCTGAAAAGGCTAAATTTACTGCCAAAAAGGCCGAGTTGGAGAAGTACCTCCCATTCCTGAATAGCCTCCAAAAGGAGTACGAGTCC	PX841048	NCBI	https://www.ncbi.nlm.nih.gov/nuccore/PX841048
ET_082	Ethiopia	2021-07-22	Symptomatic	0	M	H07	0.0637647	1368	72.5146	1	100	GAGGAGAAGAAGAAGAAGCTTCTAGGCAGCTACAAGTACATCGGTGCATCGATCGACAAGGATCTGGCCACCGCGAATGATGGCGTGGCGTACTACAACAAGATGGAGGAGCTCTACAAGACGCACTTGACTGCAGTGAATGCACAGATTAAGAAAGTCGAAGATGATATTAAAAAGCAAGATGAGGAGCTTAAAAAGATAGAAAATGAAGCCAATAAAACTGCTGAAAAGGCTAAATTTACTGCCAAAAAGGCCGAGTTGGAGAAGTACCTCCCATTCCTGAATAGCCTCCAAAAGGAGTACGAGTCC	PX841049	NCBI	https://www.ncbi.nlm.nih.gov/nuccore/PX841049
ET_083	Ethiopia	2021-06-07	Symptomatic	0	M	H02	0.0275049	5021	57.8172	2	79.526	GAGGAGAAGAAGAAGAAGCTTATAGGCAGCTACAAGTACATCGGTGCATCGATCGACAAGGATCTGGCCACCGCGAATGATGGCGTGGCGTACTACAACAAGATGGAGGAGCTCTACAAGACGCACTTGACTGCAGTGAATGCACAGATTAAGAAAGTCGAAGATGATATTAAAAAACAAAATGAGGAGCTTAAAAAGATAGAAAATGAAGCCAATAAAACTGCTGAAAAGGCTAAATTTACTGCCAAAAAGGCCGAGTTGGAGAAGTACCTCCCATTCCTGAATAGCCTCCAAAAGGAGTACGAGTCC	PX841048	NCBI	https://www.ncbi.nlm.nih.gov/nuccore/PX841048
ET_084	Ethiopia	2021-07-06	Symptomatic	0	M	H07	0.0637647	1232	72.4026	2	72.4026	GAGGAGAAGAAGAAGAAGCTTCTAGGCAGCTACAAGTACATCGGTGCATCGATCGACAAGGATCTGGCCACCGCGAATGATGGCGTGGCGTACTACAACAAGATGGAGGAGCTCTACAAGACGCACTTGACTGCAGTGAATGCACAGATTAAGAAAGTCGAAGATGATATTAAAAAGCAAGATGAGGAGCTTAAAAAGATAGAAAATGAAGCCAATAAAACTGCTGAAAAGGCTAAATTTACTGCCAAAAAGGCCGAGTTGGAGAAGTACCTCCCATTCCTGAATAGCCTCCAAAAGGAGTACGAGTCC	PX841049	NCBI	https://www.ncbi.nlm.nih.gov/nuccore/PX841049
ET_085	Ethiopia	2021-07-29	Symptomatic	0	M	H07	0.0637647	3633	76.7685	2	97.6879	GAGGAGAAGAAGAAGAAGCTTCTAGGCAGCTACAAGTACATCGGTGCATCGATCGACAAGGATCTGGCCACCGCGAATGATGGCGTGGCGTACTACAACAAGATGGAGGAGCTCTACAAGACGCACTTGACTGCAGTGAATGCACAGATTAAGAAAGTCGAAGATGATATTAAAAAGCAAGATGAGGAGCTTAAAAAGATAGAAAATGAAGCCAATAAAACTGCTGAAAAGGCTAAATTTACTGCCAAAAAGGCCGAGTTGGAGAAGTACCTCCCATTCCTGAATAGCCTCCAAAAGGAGTACGAGTCC	PX841049	NCBI	https://www.ncbi.nlm.nih.gov/nuccore/PX841049
ET_086	Ethiopia	2021-07-22	Symptomatic	0	M	H07	0.0637647	908	100	1	100	GAGGAGAAGAAGAAGAAGCTTCTAGGCAGCTACAAGTACATCGGTGCATCGATCGACAAGGATCTGGCCACCGCGAATGATGGCGTGGCGTACTACAACAAGATGGAGGAGCTCTACAAGACGCACTTGACTGCAGTGAATGCACAGATTAAGAAAGTCGAAGATGATATTAAAAAGCAAGATGAGGAGCTTAAAAAGATAGAAAATGAAGCCAATAAAACTGCTGAAAAGGCTAAATTTACTGCCAAAAAGGCCGAGTTGGAGAAGTACCTCCCATTCCTGAATAGCCTCCAAAAGGAGTACGAGTCC	PX841049	NCBI	https://www.ncbi.nlm.nih.gov/nuccore/PX841049
ET_087	Ethiopia	2021-07-28	Symptomatic	0	M	H13	0.0315241	5881	43.309	3	64.6149	GAGGAGAAGAAGAAGAAGCTTATAGGCAGCTACAAGTACATCGGTGCATCGATCGACATGGATCTGGCCACCGCGAATGATGGCGTGGCGTACTACAACAAGATGGAGGAGCTCTACAAGACGCACTTGACTGCAGTGAATGCACAGATTAAGAAAGTCGAAGATGATATTAAAAAACAAAATGAGGAGCTTAAAAAGATAGAAAATGAAGCCAATAAAACTGCTGAAAAGGCTAAATTTACTGCCAAAAAGGCCGAGTTGGAGAAGTACCTCCCATTCCTGAATAGCCTCCAAAAGGAGTACGAGTCC	PX841058	NCBI	https://www.ncbi.nlm.nih.gov/nuccore/PX841058
ET_090	Ethiopia	2021-05-20	Symptomatic	0	M	H13	0.0315241	1392	45.1868	3	45.1868	GAGGAGAAGAAGAAGAAGCTTATAGGCAGCTACAAGTACATCGGTGCATCGATCGACATGGATCTGGCCACCGCGAATGATGGCGTGGCGTACTACAACAAGATGGAGGAGCTCTACAAGACGCACTTGACTGCAGTGAATGCACAGATTAAGAAAGTCGAAGATGATATTAAAAAACAAAATGAGGAGCTTAAAAAGATAGAAAATGAAGCCAATAAAACTGCTGAAAAGGCTAAATTTACTGCCAAAAAGGCCGAGTTGGAGAAGTACCTCCCATTCCTGAATAGCCTCCAAAAGGAGTACGAGTCC	PX841058	NCBI	https://www.ncbi.nlm.nih.gov/nuccore/PX841058
ET_090	Ethiopia	2021-07-27	Symptomatic	1	M	H03	0.0231214	5281	55.3304	3	69.324	GAGGAGAAGAAGAAGAAGCTTATAGGCAGCTACAAGTACATCGGTGCATCGATCGACATGGATCTGGCCACCGCGAATGATGGCGTGGCGTACTACAACAAGATGGAGGAGCTCTACAAGACGCACTTGACTGCAGTGAATGAAGAGGTTAAGAAAGTCGAAGCTGATATTAAAAAAGAAGATGATAAGATTAAAAAGATAGAAAATGATACCACTAAAACTACTGAAAAGACCCAATCGATGGCCAAAAAGGCCGAGCTGGAGAAGTACCTCCCGTTCCTGAATAGCCTCCAAAAGGAGTACGAGTCC	PX841052	NCBI	https://www.ncbi.nlm.nih.gov/nuccore/PX841052
ET_090	Ethiopia	2021-07-19	Symptomatic	2	M	H01	0.00892495	4724	71.7401	1	100	GAGGAGAAGAAGAAGAAGCTTATAGGCAGCTACAAGTACATCGGTGCATCGATCGACATGGATCTGGCCACCGCGAATGATGGCGTGGCGTACTACAACAAGATGGAGGAGCTCTACAAGACGCACTTGGATGGAGTGAAAACAGAGATTAAGAAAGTCGAAGATGATATTAAAAAACATGATGAGAAGCTTAAAAAGATAGAAAATGAAGCCAGTAAAACTAGTGAAAAGACCCAATTGAATGCCAAAAAGGCCGAGCTGGAGAAGTACCTCCCGTTCCTGAATAGCCTCCAAAAGGAGTACGAGTCC	PX841046	NCBI	https://www.ncbi.nlm.nih.gov/nuccore/PX841046
ET_090	Ethiopia	2021-05-20	Symptomatic	3	M	H01	0.00892495	8059	72.5524	1	100	GAGGAGAAGAAGAAGAAGCTTATAGGCAGCTACAAGTACATCGGTGCATCGATCGACATGGATCTGGCCACCGCGAATGATGGCGTGGCGTACTACAACAAGATGGAGGAGCTCTACAAGACGCACTTGGATGGAGTGAAAACAGAGATTAAGAAAGTCGAAGATGATATTAAAAAACATGATGAGAAGCTTAAAAAGATAGAAAATGAAGCCAGTAAAACTAGTGAAAAGACCCAATTGAATGCCAAAAAGGCCGAGCTGGAGAAGTACCTCCCGTTCCTGAATAGCCTCCAAAAGGAGTACGAGTCC	PX841046	NCBI	https://www.ncbi.nlm.nih.gov/nuccore/PX841046
ET_091	Ethiopia	2021-05-31	Symptomatic	0	M	H08	0.487496	2923	73.7598	1	100	GAGGAGAAGAAGAAGAAGCTTATAGGCAGCTACAAGTACATCGGTGCATCGATCGACATGGATCTGGCCACCGCGAATGATGGCGTGGCGTACTACAACAAGATGGAGGAGCTCTACAAGACGCACTTGACTGCAGTGAATGCACAGATTAAGAAAGTCGAAGATGATATTAAAAAACAAAATGAGGAGCTTAAAAAGATAGAAAATGATACCACTAAAACTACTGAAAAGGCTAAATTTACTGCCAAAAAGGCCGAGCTGGAGAAGTACCTCCCGTTCCTGAATAGCCTCCAAAAGGAGTACGAGTCC	PX841057	NCBI	https://www.ncbi.nlm.nih.gov/nuccore/PX841057
ET_092	Ethiopia	2019-12-26	Symptomatic	0	M	H06	0.0245161	15498	79.6683	2	95.6898	GAGGAGAAGAAGAAGAAGCTTCTAGGCAGCTACAAGTACATCGGTGCATCGATCGACAAGGATCTGGCCACCGCGAATGATGGCGTGACCTACTACAACAAGATGGGGGAGCTCTACAAGACGCACTTGGATGGAGTGAAAACAGAGATTAAGAAAGTCGAAGATGATATTAAAAAGCAAGATGAGGAACTTAAAAAGATAGAAAATGTTACCAGTAAAACTAGTAAAAAGAACGAATTTATTGCCAAAAAGGCCGAGCTGGAGAAGTACCTCCCGTTCCTGAATAGCCTCCAAAAGGAGTACGAGTCC	PX841051	NCBI	https://www.ncbi.nlm.nih.gov/nuccore/PX841051
ET_093	Ethiopia	2021-06-25	Symptomatic	0	M	H01	0.00892495	2888	100	1	100	GAGGAGAAGAAGAAGAAGCTTATAGGCAGCTACAAGTACATCGGTGCATCGATCGACATGGATCTGGCCACCGCGAATGATGGCGTGGCGTACTACAACAAGATGGAGGAGCTCTACAAGACGCACTTGGATGGAGTGAAAACAGAGATTAAGAAAGTCGAAGATGATATTAAAAAACATGATGAGAAGCTTAAAAAGATAGAAAATGAAGCCAGTAAAACTAGTGAAAAGACCCAATTGAATGCCAAAAAGGCCGAGCTGGAGAAGTACCTCCCGTTCCTGAATAGCCTCCAAAAGGAGTACGAGTCC	PX841046	NCBI	https://www.ncbi.nlm.nih.gov/nuccore/PX841046
ET_094	Ethiopia	2020-10-02	Symptomatic	0	M	H01	0.00892495	11255	71.7281	1	100	GAGGAGAAGAAGAAGAAGCTTATAGGCAGCTACAAGTACATCGGTGCATCGATCGACATGGATCTGGCCACCGCGAATGATGGCGTGGCGTACTACAACAAGATGGAGGAGCTCTACAAGACGCACTTGGATGGAGTGAAAACAGAGATTAAGAAAGTCGAAGATGATATTAAAAAACATGATGAGAAGCTTAAAAAGATAGAAAATGAAGCCAGTAAAACTAGTGAAAAGACCCAATTGAATGCCAAAAAGGCCGAGCTGGAGAAGTACCTCCCGTTCCTGAATAGCCTCCAAAAGGAGTACGAGTCC	PX841046	NCBI	https://www.ncbi.nlm.nih.gov/nuccore/PX841046
ET_094	Ethiopia	2020-11-26	Symptomatic	1	M	H01	0.00892495	3023	77.5389	1	100	GAGGAGAAGAAGAAGAAGCTTATAGGCAGCTACAAGTACATCGGTGCATCGATCGACATGGATCTGGCCACCGCGAATGATGGCGTGGCGTACTACAACAAGATGGAGGAGCTCTACAAGACGCACTTGGATGGAGTGAAAACAGAGATTAAGAAAGTCGAAGATGATATTAAAAAACATGATGAGAAGCTTAAAAAGATAGAAAATGAAGCCAGTAAAACTAGTGAAAAGACCCAATTGAATGCCAAAAAGGCCGAGCTGGAGAAGTACCTCCCGTTCCTGAATAGCCTCCAAAAGGAGTACGAGTCC	PX841046	NCBI	https://www.ncbi.nlm.nih.gov/nuccore/PX841046
ET_095	Ethiopia	2020-11-07	Symptomatic	0	F	H06	0.0245161	11939	72.3762	1	100	GAGGAGAAGAAGAAGAAGCTTCTAGGCAGCTACAAGTACATCGGTGCATCGATCGACAAGGATCTGGCCACCGCGAATGATGGCGTGACCTACTACAACAAGATGGGGGAGCTCTACAAGACGCACTTGGATGGAGTGAAAACAGAGATTAAGAAAGTCGAAGATGATATTAAAAAGCAAGATGAGGAACTTAAAAAGATAGAAAATGTTACCAGTAAAACTAGTAAAAAGAACGAATTTATTGCCAAAAAGGCCGAGCTGGAGAAGTACCTCCCGTTCCTGAATAGCCTCCAAAAGGAGTACGAGTCC	PX841051	NCBI	https://www.ncbi.nlm.nih.gov/nuccore/PX841051
ET_096	Ethiopia	2020-11-09	Symptomatic	0	M	H01	0.00892495	13699	72.0126	2	99.6715	GAGGAGAAGAAGAAGAAGCTTATAGGCAGCTACAAGTACATCGGTGCATCGATCGACATGGATCTGGCCACCGCGAATGATGGCGTGGCGTACTACAACAAGATGGAGGAGCTCTACAAGACGCACTTGGATGGAGTGAAAACAGAGATTAAGAAAGTCGAAGATGATATTAAAAAACATGATGAGAAGCTTAAAAAGATAGAAAATGAAGCCAGTAAAACTAGTGAAAAGACCCAATTGAATGCCAAAAAGGCCGAGCTGGAGAAGTACCTCCCGTTCCTGAATAGCCTCCAAAAGGAGTACGAGTCC	PX841046	NCBI	https://www.ncbi.nlm.nih.gov/nuccore/PX841046
ET_097	Ethiopia	2021-06-02	Symptomatic	0	M	H01	0.00892495	8771	45.5136	3	69.5474	GAGGAGAAGAAGAAGAAGCTTATAGGCAGCTACAAGTACATCGGTGCATCGATCGACATGGATCTGGCCACCGCGAATGATGGCGTGGCGTACTACAACAAGATGGAGGAGCTCTACAAGACGCACTTGGATGGAGTGAAAACAGAGATTAAGAAAGTCGAAGATGATATTAAAAAACATGATGAGAAGCTTAAAAAGATAGAAAATGAAGCCAGTAAAACTAGTGAAAAGACCCAATTGAATGCCAAAAAGGCCGAGCTGGAGAAGTACCTCCCGTTCCTGAATAGCCTCCAAAAGGAGTACGAGTCC	PX841046	NCBI	https://www.ncbi.nlm.nih.gov/nuccore/PX841046
ET_098	Ethiopia	2020-11-07	Symptomatic	0	M	H02	0.0275049	9634	69.919	1	100	GAGGAGAAGAAGAAGAAGCTTATAGGCAGCTACAAGTACATCGGTGCATCGATCGACAAGGATCTGGCCACCGCGAATGATGGCGTGGCGTACTACAACAAGATGGAGGAGCTCTACAAGACGCACTTGACTGCAGTGAATGCACAGATTAAGAAAGTCGAAGATGATATTAAAAAACAAAATGAGGAGCTTAAAAAGATAGAAAATGAAGCCAATAAAACTGCTGAAAAGGCTAAATTTACTGCCAAAAAGGCCGAGTTGGAGAAGTACCTCCCATTCCTGAATAGCCTCCAAAAGGAGTACGAGTCC	PX841048	NCBI	https://www.ncbi.nlm.nih.gov/nuccore/PX841048
ET_099	Ethiopia	2020-11-07	Symptomatic	0	M	H01	0.00892495	6298	66.8943	1	100	GAGGAGAAGAAGAAGAAGCTTATAGGCAGCTACAAGTACATCGGTGCATCGATCGACATGGATCTGGCCACCGCGAATGATGGCGTGGCGTACTACAACAAGATGGAGGAGCTCTACAAGACGCACTTGGATGGAGTGAAAACAGAGATTAAGAAAGTCGAAGATGATATTAAAAAACATGATGAGAAGCTTAAAAAGATAGAAAATGAAGCCAGTAAAACTAGTGAAAAGACCCAATTGAATGCCAAAAAGGCCGAGCTGGAGAAGTACCTCCCGTTCCTGAATAGCCTCCAAAAGGAGTACGAGTCC	PX841046	NCBI	https://www.ncbi.nlm.nih.gov/nuccore/PX841046
ET_100	Ethiopia	2020-12-16	Symptomatic	0	M	H02	0.0275049	10021	74.6432	1	100	GAGGAGAAGAAGAAGAAGCTTATAGGCAGCTACAAGTACATCGGTGCATCGATCGACAAGGATCTGGCCACCGCGAATGATGGCGTGGCGTACTACAACAAGATGGAGGAGCTCTACAAGACGCACTTGACTGCAGTGAATGCACAGATTAAGAAAGTCGAAGATGATATTAAAAAACAAAATGAGGAGCTTAAAAAGATAGAAAATGAAGCCAATAAAACTGCTGAAAAGGCTAAATTTACTGCCAAAAAGGCCGAGTTGGAGAAGTACCTCCCATTCCTGAATAGCCTCCAAAAGGAGTACGAGTCC	PX841048	NCBI	https://www.ncbi.nlm.nih.gov/nuccore/PX841048
ET_101	Ethiopia	2020-11-19	Symptomatic	0	M	H01	0.00892495	8920	74.3498	1	100	GAGGAGAAGAAGAAGAAGCTTATAGGCAGCTACAAGTACATCGGTGCATCGATCGACATGGATCTGGCCACCGCGAATGATGGCGTGGCGTACTACAACAAGATGGAGGAGCTCTACAAGACGCACTTGGATGGAGTGAAAACAGAGATTAAGAAAGTCGAAGATGATATTAAAAAACATGATGAGAAGCTTAAAAAGATAGAAAATGAAGCCAGTAAAACTAGTGAAAAGACCCAATTGAATGCCAAAAAGGCCGAGCTGGAGAAGTACCTCCCGTTCCTGAATAGCCTCCAAAAGGAGTACGAGTCC	PX841046	NCBI	https://www.ncbi.nlm.nih.gov/nuccore/PX841046
ET_102	Ethiopia	2020-11-02	Symptomatic	0	F	H02	0.0275049	8968	70.8185	1	100	GAGGAGAAGAAGAAGAAGCTTATAGGCAGCTACAAGTACATCGGTGCATCGATCGACAAGGATCTGGCCACCGCGAATGATGGCGTGGCGTACTACAACAAGATGGAGGAGCTCTACAAGACGCACTTGACTGCAGTGAATGCACAGATTAAGAAAGTCGAAGATGATATTAAAAAACAAAATGAGGAGCTTAAAAAGATAGAAAATGAAGCCAATAAAACTGCTGAAAAGGCTAAATTTACTGCCAAAAAGGCCGAGTTGGAGAAGTACCTCCCATTCCTGAATAGCCTCCAAAAGGAGTACGAGTCC	PX841048	NCBI	https://www.ncbi.nlm.nih.gov/nuccore/PX841048
ET_103	Ethiopia	2019-12-25	Symptomatic	0	F	H02	0.0275049	3877	62.2646	1	100	GAGGAGAAGAAGAAGAAGCTTATAGGCAGCTACAAGTACATCGGTGCATCGATCGACAAGGATCTGGCCACCGCGAATGATGGCGTGGCGTACTACAACAAGATGGAGGAGCTCTACAAGACGCACTTGACTGCAGTGAATGCACAGATTAAGAAAGTCGAAGATGATATTAAAAAACAAAATGAGGAGCTTAAAAAGATAGAAAATGAAGCCAATAAAACTGCTGAAAAGGCTAAATTTACTGCCAAAAAGGCCGAGTTGGAGAAGTACCTCCCATTCCTGAATAGCCTCCAAAAGGAGTACGAGTCC	PX841048	NCBI	https://www.ncbi.nlm.nih.gov/nuccore/PX841048
ET_104	Ethiopia	2020-01-02	Symptomatic	0	M	H02	0.0275049	8309	63.8825	1	100	GAGGAGAAGAAGAAGAAGCTTATAGGCAGCTACAAGTACATCGGTGCATCGATCGACAAGGATCTGGCCACCGCGAATGATGGCGTGGCGTACTACAACAAGATGGAGGAGCTCTACAAGACGCACTTGACTGCAGTGAATGCACAGATTAAGAAAGTCGAAGATGATATTAAAAAACAAAATGAGGAGCTTAAAAAGATAGAAAATGAAGCCAATAAAACTGCTGAAAAGGCTAAATTTACTGCCAAAAAGGCCGAGTTGGAGAAGTACCTCCCATTCCTGAATAGCCTCCAAAAGGAGTACGAGTCC	PX841048	NCBI	https://www.ncbi.nlm.nih.gov/nuccore/PX841048
ET_105	Ethiopia	2019-10-03	Symptomatic	0	M	H08	0.487496	8261	67.5221	2	93.5238	GAGGAGAAGAAGAAGAAGCTTATAGGCAGCTACAAGTACATCGGTGCATCGATCGACATGGATCTGGCCACCGCGAATGATGGCGTGGCGTACTACAACAAGATGGAGGAGCTCTACAAGACGCACTTGACTGCAGTGAATGCACAGATTAAGAAAGTCGAAGATGATATTAAAAAACAAAATGAGGAGCTTAAAAAGATAGAAAATGATACCACTAAAACTACTGAAAAGGCTAAATTTACTGCCAAAAAGGCCGAGCTGGAGAAGTACCTCCCGTTCCTGAATAGCCTCCAAAAGGAGTACGAGTCC	PX841057	NCBI	https://www.ncbi.nlm.nih.gov/nuccore/PX841057
ET_106	Ethiopia	2019-10-10	Symptomatic	0	M	H12	0.0647621	14107	72.2478	1	100	GAGGAGAAGAAGAAGAAGCTTATAGGCAGCTACAAGTACATCGGTGCATCGATCGACAAGGATCTGGCCACCGCGAATGATGGCGTGGCGTACTACAACAAGATGGGGGAGCTCTACAAGACGCACTTGGATGGAGTGAAAACAGAGATTAAGAAAGTCGAAGATGATATTAAAAAGCAAGATGAAGAACTTAAAAAGATAGAAAATGTTACCAGTAAAACTAGTAAAAAGAACGAATTTATTGCCAAAAAGGCCGAGCTGGAGAAGTACCTCCCGTTCCTGAATAGCCTCCAAAAGGAGTACGAGTCC	PX841059	NCBI	https://www.ncbi.nlm.nih.gov/nuccore/PX841059
ET_107	Ethiopia	2021-01-29	Symptomatic	0	M	H02	0.0275049	10484	69.9447	2	96.7283	GAGGAGAAGAAGAAGAAGCTTATAGGCAGCTACAAGTACATCGGTGCATCGATCGACAAGGATCTGGCCACCGCGAATGATGGCGTGGCGTACTACAACAAGATGGAGGAGCTCTACAAGACGCACTTGACTGCAGTGAATGCACAGATTAAGAAAGTCGAAGATGATATTAAAAAACAAAATGAGGAGCTTAAAAAGATAGAAAATGAAGCCAATAAAACTGCTGAAAAGGCTAAATTTACTGCCAAAAAGGCCGAGTTGGAGAAGTACCTCCCATTCCTGAATAGCCTCCAAAAGGAGTACGAGTCC	PX841048	NCBI	https://www.ncbi.nlm.nih.gov/nuccore/PX841048
ET_108	Ethiopia	2021-01-13	Symptomatic	0	F	H01	0.00892495	14431	72.1502	1	100	GAGGAGAAGAAGAAGAAGCTTATAGGCAGCTACAAGTACATCGGTGCATCGATCGACATGGATCTGGCCACCGCGAATGATGGCGTGGCGTACTACAACAAGATGGAGGAGCTCTACAAGACGCACTTGGATGGAGTGAAAACAGAGATTAAGAAAGTCGAAGATGATATTAAAAAACATGATGAGAAGCTTAAAAAGATAGAAAATGAAGCCAGTAAAACTAGTGAAAAGACCCAATTGAATGCCAAAAAGGCCGAGCTGGAGAAGTACCTCCCGTTCCTGAATAGCCTCCAAAAGGAGTACGAGTCC	PX841046	NCBI	https://www.ncbi.nlm.nih.gov/nuccore/PX841046
ET_109	Ethiopia	2020-11-27	Symptomatic	0	F	H02	0.0275049	9677	77.9374	1	100	GAGGAGAAGAAGAAGAAGCTTATAGGCAGCTACAAGTACATCGGTGCATCGATCGACAAGGATCTGGCCACCGCGAATGATGGCGTGGCGTACTACAACAAGATGGAGGAGCTCTACAAGACGCACTTGACTGCAGTGAATGCACAGATTAAGAAAGTCGAAGATGATATTAAAAAACAAAATGAGGAGCTTAAAAAGATAGAAAATGAAGCCAATAAAACTGCTGAAAAGGCTAAATTTACTGCCAAAAAGGCCGAGTTGGAGAAGTACCTCCCATTCCTGAATAGCCTCCAAAAGGAGTACGAGTCC	PX841048	NCBI	https://www.ncbi.nlm.nih.gov/nuccore/PX841048
ET_110	Ethiopia	2020-12-14	Symptomatic	0	F	H02	0.0275049	4075	75.5828	1	100	GAGGAGAAGAAGAAGAAGCTTATAGGCAGCTACAAGTACATCGGTGCATCGATCGACAAGGATCTGGCCACCGCGAATGATGGCGTGGCGTACTACAACAAGATGGAGGAGCTCTACAAGACGCACTTGACTGCAGTGAATGCACAGATTAAGAAAGTCGAAGATGATATTAAAAAACAAAATGAGGAGCTTAAAAAGATAGAAAATGAAGCCAATAAAACTGCTGAAAAGGCTAAATTTACTGCCAAAAAGGCCGAGTTGGAGAAGTACCTCCCATTCCTGAATAGCCTCCAAAAGGAGTACGAGTCC	PX841048	NCBI	https://www.ncbi.nlm.nih.gov/nuccore/PX841048
ET_111	Ethiopia	2021-06-22	Symptomatic	0	M	H01	0.00892495	864	100	1	100	GAGGAGAAGAAGAAGAAGCTTATAGGCAGCTACAAGTACATCGGTGCATCGATCGACATGGATCTGGCCACCGCGAATGATGGCGTGGCGTACTACAACAAGATGGAGGAGCTCTACAAGACGCACTTGGATGGAGTGAAAACAGAGATTAAGAAAGTCGAAGATGATATTAAAAAACATGATGAGAAGCTTAAAAAGATAGAAAATGAAGCCAGTAAAACTAGTGAAAAGACCCAATTGAATGCCAAAAAGGCCGAGCTGGAGAAGTACCTCCCGTTCCTGAATAGCCTCCAAAAGGAGTACGAGTCC	PX841046	NCBI	https://www.ncbi.nlm.nih.gov/nuccore/PX841046
ET_112	Ethiopia	2021-06-23	Symptomatic	0	M	H01	0.00892495	10459	75.7721	1	100	GAGGAGAAGAAGAAGAAGCTTATAGGCAGCTACAAGTACATCGGTGCATCGATCGACATGGATCTGGCCACCGCGAATGATGGCGTGGCGTACTACAACAAGATGGAGGAGCTCTACAAGACGCACTTGGATGGAGTGAAAACAGAGATTAAGAAAGTCGAAGATGATATTAAAAAACATGATGAGAAGCTTAAAAAGATAGAAAATGAAGCCAGTAAAACTAGTGAAAAGACCCAATTGAATGCCAAAAAGGCCGAGCTGGAGAAGTACCTCCCGTTCCTGAATAGCCTCCAAAAGGAGTACGAGTCC	PX841046	NCBI	https://www.ncbi.nlm.nih.gov/nuccore/PX841046
ET_113	Ethiopia	2021-01-05	Symptomatic	0	M	H11	0.500697	3834	75.952	1	100	GAGGAGAAGAAGAAGAAGCTTCTAGGCAGCTACAAGTACATCGGTGCATCGATCGACAAGGATCTGGCCACCGCGAATGATGGCGTGGCGTACTACAACAAGATGGAGGAGCTCTACAAGACGCACTTGACTGCAGTGAATGAAGAGGTTAAGAAAGTCGAAGCTGATATTAAAAAAGAAGATGATAAGATTAAAAAGATAGAAAATGAAGCCAATAAAACTGCTGAAAAGACCCAATCGATGGCCAAAAAGGCCGAGCTGGAGAAGTACCTCCCGTTCCTGAATAGCCTCCAAAAGGAGTACGAGTCC	PX841047	NCBI	https://www.ncbi.nlm.nih.gov/nuccore/PX841047
ET_114	Ethiopia	2020-11-02	Symptomatic	0	F	H01	0.00892495	1788	68.1767	1	100	GAGGAGAAGAAGAAGAAGCTTATAGGCAGCTACAAGTACATCGGTGCATCGATCGACATGGATCTGGCCACCGCGAATGATGGCGTGGCGTACTACAACAAGATGGAGGAGCTCTACAAGACGCACTTGGATGGAGTGAAAACAGAGATTAAGAAAGTCGAAGATGATATTAAAAAACATGATGAGAAGCTTAAAAAGATAGAAAATGAAGCCAGTAAAACTAGTGAAAAGACCCAATTGAATGCCAAAAAGGCCGAGCTGGAGAAGTACCTCCCGTTCCTGAATAGCCTCCAAAAGGAGTACGAGTCC	PX841046	NCBI	https://www.ncbi.nlm.nih.gov/nuccore/PX841046
ET_115	Ethiopia	2019-10-10	Symptomatic	0	M	H02	0.0275049	5025	72.0199	2	94.7463	GAGGAGAAGAAGAAGAAGCTTATAGGCAGCTACAAGTACATCGGTGCATCGATCGACAAGGATCTGGCCACCGCGAATGATGGCGTGGCGTACTACAACAAGATGGAGGAGCTCTACAAGACGCACTTGACTGCAGTGAATGCACAGATTAAGAAAGTCGAAGATGATATTAAAAAACAAAATGAGGAGCTTAAAAAGATAGAAAATGAAGCCAATAAAACTGCTGAAAAGGCTAAATTTACTGCCAAAAAGGCCGAGTTGGAGAAGTACCTCCCATTCCTGAATAGCCTCCAAAAGGAGTACGAGTCC	PX841048	NCBI	https://www.ncbi.nlm.nih.gov/nuccore/PX841048
ET_116	Ethiopia	2019-11-29	Symptomatic	0	F	H10	0.46469	4581	68.6968	2	97.2495	GAGGAGAAGAAGAAGAAGCTTCTAGGCAGCTACAAGTACATCGGTGCATCGATCGACAAGGATCTGGCCACCGCGAATGATGGCGTGGCGTACTACAACAAGATGGGGGAGCTCTACAAGACGCACTTGGATGGAGTGAAAACAGAGATTAAGAAAGTCGAAGATGATATTAAAAAGCAAGATGAGGAACTTAAAAAGATAGAAAATGTTACCAGTAAAACTAGTAAAAAGAACGAATTTATTGCCAAAAAGGCCGAGCTGGAGAAGTACCTCCCGTTCCTGAATAGCCTCCAAAAGGAGTACGAGTCC	PX841050	NCBI	https://www.ncbi.nlm.nih.gov/nuccore/PX841050
ET_117	Ethiopia	2019-11-11	Symptomatic	0	M	H01	0.00892495	2026	74.5805	1	100	GAGGAGAAGAAGAAGAAGCTTATAGGCAGCTACAAGTACATCGGTGCATCGATCGACATGGATCTGGCCACCGCGAATGATGGCGTGGCGTACTACAACAAGATGGAGGAGCTCTACAAGACGCACTTGGATGGAGTGAAAACAGAGATTAAGAAAGTCGAAGATGATATTAAAAAACATGATGAGAAGCTTAAAAAGATAGAAAATGAAGCCAGTAAAACTAGTGAAAAGACCCAATTGAATGCCAAAAAGGCCGAGCTGGAGAAGTACCTCCCGTTCCTGAATAGCCTCCAAAAGGAGTACGAGTCC	PX841046	NCBI	https://www.ncbi.nlm.nih.gov/nuccore/PX841046
ET_117	Ethiopia	2020-02-05	Asymptomatic	1	M	H01	0.00892495	4083	74.0632	1	100	GAGGAGAAGAAGAAGAAGCTTATAGGCAGCTACAAGTACATCGGTGCATCGATCGACATGGATCTGGCCACCGCGAATGATGGCGTGGCGTACTACAACAAGATGGAGGAGCTCTACAAGACGCACTTGGATGGAGTGAAAACAGAGATTAAGAAAGTCGAAGATGATATTAAAAAACATGATGAGAAGCTTAAAAAGATAGAAAATGAAGCCAGTAAAACTAGTGAAAAGACCCAATTGAATGCCAAAAAGGCCGAGCTGGAGAAGTACCTCCCGTTCCTGAATAGCCTCCAAAAGGAGTACGAGTCC	PX841046	NCBI	https://www.ncbi.nlm.nih.gov/nuccore/PX841046
ET_118	Ethiopia	2020-03-12	Symptomatic	0	M	H03	0.0231214	2806	81.3614	1	100	GAGGAGAAGAAGAAGAAGCTTATAGGCAGCTACAAGTACATCGGTGCATCGATCGACATGGATCTGGCCACCGCGAATGATGGCGTGGCGTACTACAACAAGATGGAGGAGCTCTACAAGACGCACTTGACTGCAGTGAATGAAGAGGTTAAGAAAGTCGAAGCTGATATTAAAAAAGAAGATGATAAGATTAAAAAGATAGAAAATGATACCACTAAAACTACTGAAAAGACCCAATCGATGGCCAAAAAGGCCGAGCTGGAGAAGTACCTCCCGTTCCTGAATAGCCTCCAAAAGGAGTACGAGTCC	PX841052	NCBI	https://www.ncbi.nlm.nih.gov/nuccore/PX841052
ET_119	Ethiopia	2020-03-05	Symptomatic	0	M	H02	0.0275049	7140	62.6751	3	86.3025	GAGGAGAAGAAGAAGAAGCTTATAGGCAGCTACAAGTACATCGGTGCATCGATCGACAAGGATCTGGCCACCGCGAATGATGGCGTGGCGTACTACAACAAGATGGAGGAGCTCTACAAGACGCACTTGACTGCAGTGAATGCACAGATTAAGAAAGTCGAAGATGATATTAAAAAACAAAATGAGGAGCTTAAAAAGATAGAAAATGAAGCCAATAAAACTGCTGAAAAGGCTAAATTTACTGCCAAAAAGGCCGAGTTGGAGAAGTACCTCCCATTCCTGAATAGCCTCCAAAAGGAGTACGAGTCC	PX841048	NCBI	https://www.ncbi.nlm.nih.gov/nuccore/PX841048
ET_120	Ethiopia	2019-10-07	Symptomatic	0	F	H06	0.0245161	6968	66.791	2	86.8972	GAGGAGAAGAAGAAGAAGCTTCTAGGCAGCTACAAGTACATCGGTGCATCGATCGACAAGGATCTGGCCACCGCGAATGATGGCGTGACCTACTACAACAAGATGGGGGAGCTCTACAAGACGCACTTGGATGGAGTGAAAACAGAGATTAAGAAAGTCGAAGATGATATTAAAAAGCAAGATGAGGAACTTAAAAAGATAGAAAATGTTACCAGTAAAACTAGTAAAAAGAACGAATTTATTGCCAAAAAGGCCGAGCTGGAGAAGTACCTCCCGTTCCTGAATAGCCTCCAAAAGGAGTACGAGTCC	PX841051	NCBI	https://www.ncbi.nlm.nih.gov/nuccore/PX841051
ET_121	Ethiopia	2019-11-02	Symptomatic	0	M	H02	0.0275049	8007	66.9289	1	100	GAGGAGAAGAAGAAGAAGCTTATAGGCAGCTACAAGTACATCGGTGCATCGATCGACAAGGATCTGGCCACCGCGAATGATGGCGTGGCGTACTACAACAAGATGGAGGAGCTCTACAAGACGCACTTGACTGCAGTGAATGCACAGATTAAGAAAGTCGAAGATGATATTAAAAAACAAAATGAGGAGCTTAAAAAGATAGAAAATGAAGCCAATAAAACTGCTGAAAAGGCTAAATTTACTGCCAAAAAGGCCGAGTTGGAGAAGTACCTCCCATTCCTGAATAGCCTCCAAAAGGAGTACGAGTCC	PX841048	NCBI	https://www.ncbi.nlm.nih.gov/nuccore/PX841048
ET_122	Ethiopia	2020-01-14	Symptomatic	0	F	H03	0.0231214	5988	66.2826	2	96.5431	GAGGAGAAGAAGAAGAAGCTTATAGGCAGCTACAAGTACATCGGTGCATCGATCGACATGGATCTGGCCACCGCGAATGATGGCGTGGCGTACTACAACAAGATGGAGGAGCTCTACAAGACGCACTTGACTGCAGTGAATGAAGAGGTTAAGAAAGTCGAAGCTGATATTAAAAAAGAAGATGATAAGATTAAAAAGATAGAAAATGATACCACTAAAACTACTGAAAAGACCCAATCGATGGCCAAAAAGGCCGAGCTGGAGAAGTACCTCCCGTTCCTGAATAGCCTCCAAAAGGAGTACGAGTCC	PX841052	NCBI	https://www.ncbi.nlm.nih.gov/nuccore/PX841052
ET_123	Ethiopia	2020-09-28	Symptomatic	0	F	H02	0.0275049	21554	72.5295	2	97.3555	GAGGAGAAGAAGAAGAAGCTTATAGGCAGCTACAAGTACATCGGTGCATCGATCGACAAGGATCTGGCCACCGCGAATGATGGCGTGGCGTACTACAACAAGATGGAGGAGCTCTACAAGACGCACTTGACTGCAGTGAATGCACAGATTAAGAAAGTCGAAGATGATATTAAAAAACAAAATGAGGAGCTTAAAAAGATAGAAAATGAAGCCAATAAAACTGCTGAAAAGGCTAAATTTACTGCCAAAAAGGCCGAGTTGGAGAAGTACCTCCCATTCCTGAATAGCCTCCAAAAGGAGTACGAGTCC	PX841048	NCBI	https://www.ncbi.nlm.nih.gov/nuccore/PX841048
ET_124	Ethiopia	2020-11-05	Symptomatic	0	F	H09	0.894651	15890	59.8112	2	89.4651	GAGGAGAAGAAGAAGAAGCTTATAGGCAGCTACAAGTACATCGGTGCATCGATCGACAAGGATCTGGCCACCGCGAATGATGGCGTGGCGTACTACAACAAGATGGAGGAGCTCTACAAGACGCACTTGACTGCAGTGAATGCACAGATTAAGAAAGTCGAAGATGATATTAAAAAACAAAATGAGGAGCTTAAAAAGATAGAAAATGAAGCCAATAAAACTGCTGAAAAGGCTAAATTTACTGCCAAAAAGGCCGAGCTGGAGAAGTACCTCCCGTTCCTGAATAGCCTCCAAAAGGAGTACGAGTCC	PX841053	NCBI	https://www.ncbi.nlm.nih.gov/nuccore/PX841053
ET_125	Ethiopia	2020-01-04	Symptomatic	0	F	H09	0.894651	13542	73.2462	2	96.8395	GAGGAGAAGAAGAAGAAGCTTATAGGCAGCTACAAGTACATCGGTGCATCGATCGACAAGGATCTGGCCACCGCGAATGATGGCGTGGCGTACTACAACAAGATGGAGGAGCTCTACAAGACGCACTTGACTGCAGTGAATGCACAGATTAAGAAAGTCGAAGATGATATTAAAAAACAAAATGAGGAGCTTAAAAAGATAGAAAATGAAGCCAATAAAACTGCTGAAAAGGCTAAATTTACTGCCAAAAAGGCCGAGCTGGAGAAGTACCTCCCGTTCCTGAATAGCCTCCAAAAGGAGTACGAGTCC	PX841053	NCBI	https://www.ncbi.nlm.nih.gov/nuccore/PX841053
ET_126	Ethiopia	2020-01-22	Symptomatic	0	M	H01	0.00892495	8568	70.3548	1	100	GAGGAGAAGAAGAAGAAGCTTATAGGCAGCTACAAGTACATCGGTGCATCGATCGACATGGATCTGGCCACCGCGAATGATGGCGTGGCGTACTACAACAAGATGGAGGAGCTCTACAAGACGCACTTGGATGGAGTGAAAACAGAGATTAAGAAAGTCGAAGATGATATTAAAAAACATGATGAGAAGCTTAAAAAGATAGAAAATGAAGCCAGTAAAACTAGTGAAAAGACCCAATTGAATGCCAAAAAGGCCGAGCTGGAGAAGTACCTCCCGTTCCTGAATAGCCTCCAAAAGGAGTACGAGTCC	PX841046	NCBI	https://www.ncbi.nlm.nih.gov/nuccore/PX841046
ET_127	Ethiopia	2021-04-26	Symptomatic	0	M	H02	0.0275049	15395	72.4781	1	100	GAGGAGAAGAAGAAGAAGCTTATAGGCAGCTACAAGTACATCGGTGCATCGATCGACAAGGATCTGGCCACCGCGAATGATGGCGTGGCGTACTACAACAAGATGGAGGAGCTCTACAAGACGCACTTGACTGCAGTGAATGCACAGATTAAGAAAGTCGAAGATGATATTAAAAAACAAAATGAGGAGCTTAAAAAGATAGAAAATGAAGCCAATAAAACTGCTGAAAAGGCTAAATTTACTGCCAAAAAGGCCGAGTTGGAGAAGTACCTCCCATTCCTGAATAGCCTCCAAAAGGAGTACGAGTCC	PX841048	NCBI	https://www.ncbi.nlm.nih.gov/nuccore/PX841048
ET_128	Ethiopia	2021-05-27	Symptomatic	0	M	H03	0.0231214	13491	71.8034	2	95.7824	GAGGAGAAGAAGAAGAAGCTTATAGGCAGCTACAAGTACATCGGTGCATCGATCGACATGGATCTGGCCACCGCGAATGATGGCGTGGCGTACTACAACAAGATGGAGGAGCTCTACAAGACGCACTTGACTGCAGTGAATGAAGAGGTTAAGAAAGTCGAAGCTGATATTAAAAAAGAAGATGATAAGATTAAAAAGATAGAAAATGATACCACTAAAACTACTGAAAAGACCCAATCGATGGCCAAAAAGGCCGAGCTGGAGAAGTACCTCCCGTTCCTGAATAGCCTCCAAAAGGAGTACGAGTCC	PX841052	NCBI	https://www.ncbi.nlm.nih.gov/nuccore/PX841052
ET_129	Ethiopia	2021-05-20	Symptomatic	0	F	H01	0.00892495	3232	75.8663	1	100	GAGGAGAAGAAGAAGAAGCTTATAGGCAGCTACAAGTACATCGGTGCATCGATCGACATGGATCTGGCCACCGCGAATGATGGCGTGGCGTACTACAACAAGATGGAGGAGCTCTACAAGACGCACTTGGATGGAGTGAAAACAGAGATTAAGAAAGTCGAAGATGATATTAAAAAACATGATGAGAAGCTTAAAAAGATAGAAAATGAAGCCAGTAAAACTAGTGAAAAGACCCAATTGAATGCCAAAAAGGCCGAGCTGGAGAAGTACCTCCCGTTCCTGAATAGCCTCCAAAAGGAGTACGAGTCC	PX841046	NCBI	https://www.ncbi.nlm.nih.gov/nuccore/PX841046
ET_130	Ethiopia	2021-06-02	Symptomatic	0	M	H01	0.00892495	5983	74.7284	1	100	GAGGAGAAGAAGAAGAAGCTTATAGGCAGCTACAAGTACATCGGTGCATCGATCGACATGGATCTGGCCACCGCGAATGATGGCGTGGCGTACTACAACAAGATGGAGGAGCTCTACAAGACGCACTTGGATGGAGTGAAAACAGAGATTAAGAAAGTCGAAGATGATATTAAAAAACATGATGAGAAGCTTAAAAAGATAGAAAATGAAGCCAGTAAAACTAGTGAAAAGACCCAATTGAATGCCAAAAAGGCCGAGCTGGAGAAGTACCTCCCGTTCCTGAATAGCCTCCAAAAGGAGTACGAGTCC	PX841046	NCBI	https://www.ncbi.nlm.nih.gov/nuccore/PX841046
ET_131	Ethiopia	2021-06-02	Symptomatic	0	M	H16	0.993145	16339	71.3508	2	99.3145	GAGGAGAAGAAGAAGAAGCTTATAGGCAGCTACAAGTACATCGGTGCATCGATCGACAAGGATCTGGCCACCGCGAATGATGGCGTGGCGTACTACAACAAGATGGAGGAGCTCTACAAGACGCACTTGACTGCAGTGAATGAAGAGGTTAAGAAAGTCGAAGCTGATATTAAAAAAGAAGATGATAAGATTAAAAAGATAGAAAATGAAGCCAATAAAACTGCTGAAAAGACCCAATCGATGGCCAAAAAGGCCGAGCTGGAGAAGTACCTCCCGTTCCTGAATAGCCTCCAAAAGGAGTACGAGTCC	PX841045	NCBI	https://www.ncbi.nlm.nih.gov/nuccore/PX841045
ET_131	Ethiopia	2021-10-16	Asymptomatic	1	M	H06	0.0245161	9855	72.826	1	100	GAGGAGAAGAAGAAGAAGCTTCTAGGCAGCTACAAGTACATCGGTGCATCGATCGACAAGGATCTGGCCACCGCGAATGATGGCGTGACCTACTACAACAAGATGGGGGAGCTCTACAAGACGCACTTGGATGGAGTGAAAACAGAGATTAAGAAAGTCGAAGATGATATTAAAAAGCAAGATGAGGAACTTAAAAAGATAGAAAATGTTACCAGTAAAACTAGTAAAAAGAACGAATTTATTGCCAAAAAGGCCGAGCTGGAGAAGTACCTCCCGTTCCTGAATAGCCTCCAAAAGGAGTACGAGTCC	PX841051	NCBI	https://www.ncbi.nlm.nih.gov/nuccore/PX841051
ET_131	Ethiopia	2022-01-03	Asymptomatic	2	M	H01	0.00892495	15698	73.9585	1	100	GAGGAGAAGAAGAAGAAGCTTATAGGCAGCTACAAGTACATCGGTGCATCGATCGACATGGATCTGGCCACCGCGAATGATGGCGTGGCGTACTACAACAAGATGGAGGAGCTCTACAAGACGCACTTGGATGGAGTGAAAACAGAGATTAAGAAAGTCGAAGATGATATTAAAAAACATGATGAGAAGCTTAAAAAGATAGAAAATGAAGCCAGTAAAACTAGTGAAAAGACCCAATTGAATGCCAAAAAGGCCGAGCTGGAGAAGTACCTCCCGTTCCTGAATAGCCTCCAAAAGGAGTACGAGTCC	PX841046	NCBI	https://www.ncbi.nlm.nih.gov/nuccore/PX841046
ET_132	Ethiopia	2020-09-30	Symptomatic	0	M	H02	0.0275049	8653	60.4646	2	94.4412	GAGGAGAAGAAGAAGAAGCTTATAGGCAGCTACAAGTACATCGGTGCATCGATCGACAAGGATCTGGCCACCGCGAATGATGGCGTGGCGTACTACAACAAGATGGAGGAGCTCTACAAGACGCACTTGACTGCAGTGAATGCACAGATTAAGAAAGTCGAAGATGATATTAAAAAACAAAATGAGGAGCTTAAAAAGATAGAAAATGAAGCCAATAAAACTGCTGAAAAGGCTAAATTTACTGCCAAAAAGGCCGAGTTGGAGAAGTACCTCCCATTCCTGAATAGCCTCCAAAAGGAGTACGAGTCC	PX841048	NCBI	https://www.ncbi.nlm.nih.gov/nuccore/PX841048
ET_133	Ethiopia	2019-12-21	Symptomatic	0	M	H03	0.0231214	3762	74.6146	1	100	GAGGAGAAGAAGAAGAAGCTTATAGGCAGCTACAAGTACATCGGTGCATCGATCGACATGGATCTGGCCACCGCGAATGATGGCGTGGCGTACTACAACAAGATGGAGGAGCTCTACAAGACGCACTTGACTGCAGTGAATGAAGAGGTTAAGAAAGTCGAAGCTGATATTAAAAAAGAAGATGATAAGATTAAAAAGATAGAAAATGATACCACTAAAACTACTGAAAAGACCCAATCGATGGCCAAAAAGGCCGAGCTGGAGAAGTACCTCCCGTTCCTGAATAGCCTCCAAAAGGAGTACGAGTCC	PX841052	NCBI	https://www.ncbi.nlm.nih.gov/nuccore/PX841052
ET_134	Ethiopia	2020-10-13	Symptomatic	0	M	H02	0.0275049	10436	76.7919	1	100	GAGGAGAAGAAGAAGAAGCTTATAGGCAGCTACAAGTACATCGGTGCATCGATCGACAAGGATCTGGCCACCGCGAATGATGGCGTGGCGTACTACAACAAGATGGAGGAGCTCTACAAGACGCACTTGACTGCAGTGAATGCACAGATTAAGAAAGTCGAAGATGATATTAAAAAACAAAATGAGGAGCTTAAAAAGATAGAAAATGAAGCCAATAAAACTGCTGAAAAGGCTAAATTTACTGCCAAAAAGGCCGAGTTGGAGAAGTACCTCCCATTCCTGAATAGCCTCCAAAAGGAGTACGAGTCC	PX841048	NCBI	https://www.ncbi.nlm.nih.gov/nuccore/PX841048
ET_135	Ethiopia	2020-11-11	Symptomatic	0	M	H02	0.0275049	10768	65.5646	1	100	GAGGAGAAGAAGAAGAAGCTTATAGGCAGCTACAAGTACATCGGTGCATCGATCGACAAGGATCTGGCCACCGCGAATGATGGCGTGGCGTACTACAACAAGATGGAGGAGCTCTACAAGACGCACTTGACTGCAGTGAATGCACAGATTAAGAAAGTCGAAGATGATATTAAAAAACAAAATGAGGAGCTTAAAAAGATAGAAAATGAAGCCAATAAAACTGCTGAAAAGGCTAAATTTACTGCCAAAAAGGCCGAGTTGGAGAAGTACCTCCCATTCCTGAATAGCCTCCAAAAGGAGTACGAGTCC	PX841048	NCBI	https://www.ncbi.nlm.nih.gov/nuccore/PX841048
ET_135	Ethiopia	2021-06-08	Asymptomatic	1	M	H02	0.0275049	11112	76.1519	2	96.7693	GAGGAGAAGAAGAAGAAGCTTATAGGCAGCTACAAGTACATCGGTGCATCGATCGACAAGGATCTGGCCACCGCGAATGATGGCGTGGCGTACTACAACAAGATGGAGGAGCTCTACAAGACGCACTTGACTGCAGTGAATGCACAGATTAAGAAAGTCGAAGATGATATTAAAAAACAAAATGAGGAGCTTAAAAAGATAGAAAATGAAGCCAATAAAACTGCTGAAAAGGCTAAATTTACTGCCAAAAAGGCCGAGTTGGAGAAGTACCTCCCATTCCTGAATAGCCTCCAAAAGGAGTACGAGTCC	PX841048	NCBI	https://www.ncbi.nlm.nih.gov/nuccore/PX841048
ET_136	Ethiopia	2021-06-03	Symptomatic	0	M	H02	0.0275049	12173	79.0274	2	97.6998	GAGGAGAAGAAGAAGAAGCTTATAGGCAGCTACAAGTACATCGGTGCATCGATCGACAAGGATCTGGCCACCGCGAATGATGGCGTGGCGTACTACAACAAGATGGAGGAGCTCTACAAGACGCACTTGACTGCAGTGAATGCACAGATTAAGAAAGTCGAAGATGATATTAAAAAACAAAATGAGGAGCTTAAAAAGATAGAAAATGAAGCCAATAAAACTGCTGAAAAGGCTAAATTTACTGCCAAAAAGGCCGAGTTGGAGAAGTACCTCCCATTCCTGAATAGCCTCCAAAAGGAGTACGAGTCC	PX841048	NCBI	https://www.ncbi.nlm.nih.gov/nuccore/PX841048
ET_136	Ethiopia	2022-05-07	Asymptomatic	1	M	H01	0.00892495	3404	65.2761	2	91.4219	GAGGAGAAGAAGAAGAAGCTTATAGGCAGCTACAAGTACATCGGTGCATCGATCGACATGGATCTGGCCACCGCGAATGATGGCGTGGCGTACTACAACAAGATGGAGGAGCTCTACAAGACGCACTTGGATGGAGTGAAAACAGAGATTAAGAAAGTCGAAGATGATATTAAAAAACATGATGAGAAGCTTAAAAAGATAGAAAATGAAGCCAGTAAAACTAGTGAAAAGACCCAATTGAATGCCAAAAAGGCCGAGCTGGAGAAGTACCTCCCGTTCCTGAATAGCCTCCAAAAGGAGTACGAGTCC	PX841046	NCBI	https://www.ncbi.nlm.nih.gov/nuccore/PX841046
ET_137	Ethiopia	2020-01-04	Symptomatic	0	M	H01	0.00892495	7262	80.3911	2	97.0669	GAGGAGAAGAAGAAGAAGCTTATAGGCAGCTACAAGTACATCGGTGCATCGATCGACATGGATCTGGCCACCGCGAATGATGGCGTGGCGTACTACAACAAGATGGAGGAGCTCTACAAGACGCACTTGGATGGAGTGAAAACAGAGATTAAGAAAGTCGAAGATGATATTAAAAAACATGATGAGAAGCTTAAAAAGATAGAAAATGAAGCCAGTAAAACTAGTGAAAAGACCCAATTGAATGCCAAAAAGGCCGAGCTGGAGAAGTACCTCCCGTTCCTGAATAGCCTCCAAAAGGAGTACGAGTCC	PX841046	NCBI	https://www.ncbi.nlm.nih.gov/nuccore/PX841046
ET_137	Ethiopia	2020-06-29	Symptomatic	1	M	H01	0.00892495	10744	71.6958	2	96.8168	GAGGAGAAGAAGAAGAAGCTTATAGGCAGCTACAAGTACATCGGTGCATCGATCGACATGGATCTGGCCACCGCGAATGATGGCGTGGCGTACTACAACAAGATGGAGGAGCTCTACAAGACGCACTTGGATGGAGTGAAAACAGAGATTAAGAAAGTCGAAGATGATATTAAAAAACATGATGAGAAGCTTAAAAAGATAGAAAATGAAGCCAGTAAAACTAGTGAAAAGACCCAATTGAATGCCAAAAAGGCCGAGCTGGAGAAGTACCTCCCGTTCCTGAATAGCCTCCAAAAGGAGTACGAGTCC	PX841046	NCBI	https://www.ncbi.nlm.nih.gov/nuccore/PX841046
ET_138	Ethiopia	2021-07-01	Symptomatic	0	M	H02	0.0275049	14787	70.5011	2	96.5713	GAGGAGAAGAAGAAGAAGCTTATAGGCAGCTACAAGTACATCGGTGCATCGATCGACAAGGATCTGGCCACCGCGAATGATGGCGTGGCGTACTACAACAAGATGGAGGAGCTCTACAAGACGCACTTGACTGCAGTGAATGCACAGATTAAGAAAGTCGAAGATGATATTAAAAAACAAAATGAGGAGCTTAAAAAGATAGAAAATGAAGCCAATAAAACTGCTGAAAAGGCTAAATTTACTGCCAAAAAGGCCGAGTTGGAGAAGTACCTCCCATTCCTGAATAGCCTCCAAAAGGAGTACGAGTCC	PX841048	NCBI	https://www.ncbi.nlm.nih.gov/nuccore/PX841048
ET_138	Ethiopia	2022-01-13	Asymptomatic	1	M	H01	0.00892495	3875	71.0194	1	100	GAGGAGAAGAAGAAGAAGCTTATAGGCAGCTACAAGTACATCGGTGCATCGATCGACATGGATCTGGCCACCGCGAATGATGGCGTGGCGTACTACAACAAGATGGAGGAGCTCTACAAGACGCACTTGGATGGAGTGAAAACAGAGATTAAGAAAGTCGAAGATGATATTAAAAAACATGATGAGAAGCTTAAAAAGATAGAAAATGAAGCCAGTAAAACTAGTGAAAAGACCCAATTGAATGCCAAAAAGGCCGAGCTGGAGAAGTACCTCCCGTTCCTGAATAGCCTCCAAAAGGAGTACGAGTCC	PX841046	NCBI	https://www.ncbi.nlm.nih.gov/nuccore/PX841046
ET_139	Ethiopia	2020-09-28	Symptomatic	0	M	H01	0.00892495	5092	65.9466	1	100	GAGGAGAAGAAGAAGAAGCTTATAGGCAGCTACAAGTACATCGGTGCATCGATCGACATGGATCTGGCCACCGCGAATGATGGCGTGGCGTACTACAACAAGATGGAGGAGCTCTACAAGACGCACTTGGATGGAGTGAAAACAGAGATTAAGAAAGTCGAAGATGATATTAAAAAACATGATGAGAAGCTTAAAAAGATAGAAAATGAAGCCAGTAAAACTAGTGAAAAGACCCAATTGAATGCCAAAAAGGCCGAGCTGGAGAAGTACCTCCCGTTCCTGAATAGCCTCCAAAAGGAGTACGAGTCC	PX841046	NCBI	https://www.ncbi.nlm.nih.gov/nuccore/PX841046
ET_139	Ethiopia	2020-11-01	Symptomatic	1	M	H01	0.00892495	10031	67.9294	2	96.5507	GAGGAGAAGAAGAAGAAGCTTATAGGCAGCTACAAGTACATCGGTGCATCGATCGACATGGATCTGGCCACCGCGAATGATGGCGTGGCGTACTACAACAAGATGGAGGAGCTCTACAAGACGCACTTGGATGGAGTGAAAACAGAGATTAAGAAAGTCGAAGATGATATTAAAAAACATGATGAGAAGCTTAAAAAGATAGAAAATGAAGCCAGTAAAACTAGTGAAAAGACCCAATTGAATGCCAAAAAGGCCGAGCTGGAGAAGTACCTCCCGTTCCTGAATAGCCTCCAAAAGGAGTACGAGTCC	PX841046	NCBI	https://www.ncbi.nlm.nih.gov/nuccore/PX841046
ET_140	Ethiopia	2021-05-03	Symptomatic	0	F	H02	0.0275049	6253	47.3053	2	61.9383	GAGGAGAAGAAGAAGAAGCTTATAGGCAGCTACAAGTACATCGGTGCATCGATCGACAAGGATCTGGCCACCGCGAATGATGGCGTGGCGTACTACAACAAGATGGAGGAGCTCTACAAGACGCACTTGACTGCAGTGAATGCACAGATTAAGAAAGTCGAAGATGATATTAAAAAACAAAATGAGGAGCTTAAAAAGATAGAAAATGAAGCCAATAAAACTGCTGAAAAGGCTAAATTTACTGCCAAAAAGGCCGAGTTGGAGAAGTACCTCCCATTCCTGAATAGCCTCCAAAAGGAGTACGAGTCC	PX841048	NCBI	https://www.ncbi.nlm.nih.gov/nuccore/PX841048
ET_140	Ethiopia	2021-07-20	Asymptomatic	1	F	H01	0.00892495	5010	38.7625	2	69.6208	GAGGAGAAGAAGAAGAAGCTTATAGGCAGCTACAAGTACATCGGTGCATCGATCGACATGGATCTGGCCACCGCGAATGATGGCGTGGCGTACTACAACAAGATGGAGGAGCTCTACAAGACGCACTTGGATGGAGTGAAAACAGAGATTAAGAAAGTCGAAGATGATATTAAAAAACATGATGAGAAGCTTAAAAAGATAGAAAATGAAGCCAGTAAAACTAGTGAAAAGACCCAATTGAATGCCAAAAAGGCCGAGCTGGAGAAGTACCTCCCGTTCCTGAATAGCCTCCAAAAGGAGTACGAGTCC	PX841046	NCBI	https://www.ncbi.nlm.nih.gov/nuccore/PX841046
ET_141	Ethiopia	2020-12-08	Symptomatic	0	F	H01	0.00892495	9409	66.0325	1	100	GAGGAGAAGAAGAAGAAGCTTATAGGCAGCTACAAGTACATCGGTGCATCGATCGACATGGATCTGGCCACCGCGAATGATGGCGTGGCGTACTACAACAAGATGGAGGAGCTCTACAAGACGCACTTGGATGGAGTGAAAACAGAGATTAAGAAAGTCGAAGATGATATTAAAAAACATGATGAGAAGCTTAAAAAGATAGAAAATGAAGCCAGTAAAACTAGTGAAAAGACCCAATTGAATGCCAAAAAGGCCGAGCTGGAGAAGTACCTCCCGTTCCTGAATAGCCTCCAAAAGGAGTACGAGTCC	PX841046	NCBI	https://www.ncbi.nlm.nih.gov/nuccore/PX841046
ET_141	Ethiopia	2021-03-03	Symptomatic	1	F	H01	0.00892495	3876	75.1032	1	100	GAGGAGAAGAAGAAGAAGCTTATAGGCAGCTACAAGTACATCGGTGCATCGATCGACATGGATCTGGCCACCGCGAATGATGGCGTGGCGTACTACAACAAGATGGAGGAGCTCTACAAGACGCACTTGGATGGAGTGAAAACAGAGATTAAGAAAGTCGAAGATGATATTAAAAAACATGATGAGAAGCTTAAAAAGATAGAAAATGAAGCCAGTAAAACTAGTGAAAAGACCCAATTGAATGCCAAAAAGGCCGAGCTGGAGAAGTACCTCCCGTTCCTGAATAGCCTCCAAAAGGAGTACGAGTCC	PX841046	NCBI	https://www.ncbi.nlm.nih.gov/nuccore/PX841046
ET_142	Ethiopia	2021-01-13	Symptomatic	0	M	H02	0.0275049	5970	77.4707	1	100	GAGGAGAAGAAGAAGAAGCTTATAGGCAGCTACAAGTACATCGGTGCATCGATCGACAAGGATCTGGCCACCGCGAATGATGGCGTGGCGTACTACAACAAGATGGAGGAGCTCTACAAGACGCACTTGACTGCAGTGAATGCACAGATTAAGAAAGTCGAAGATGATATTAAAAAACAAAATGAGGAGCTTAAAAAGATAGAAAATGAAGCCAATAAAACTGCTGAAAAGGCTAAATTTACTGCCAAAAAGGCCGAGTTGGAGAAGTACCTCCCATTCCTGAATAGCCTCCAAAAGGAGTACGAGTCC	PX841048	NCBI	https://www.ncbi.nlm.nih.gov/nuccore/PX841048
ET_142	Ethiopia	2021-06-27	Symptomatic	1	M	H02	0.0275049	5272	71.6806	1	100	GAGGAGAAGAAGAAGAAGCTTATAGGCAGCTACAAGTACATCGGTGCATCGATCGACAAGGATCTGGCCACCGCGAATGATGGCGTGGCGTACTACAACAAGATGGAGGAGCTCTACAAGACGCACTTGACTGCAGTGAATGCACAGATTAAGAAAGTCGAAGATGATATTAAAAAACAAAATGAGGAGCTTAAAAAGATAGAAAATGAAGCCAATAAAACTGCTGAAAAGGCTAAATTTACTGCCAAAAAGGCCGAGTTGGAGAAGTACCTCCCATTCCTGAATAGCCTCCAAAAGGAGTACGAGTCC	PX841048	NCBI	https://www.ncbi.nlm.nih.gov/nuccore/PX841048
ET_143	Ethiopia	2019-09-17	Symptomatic	0	M	H10	0.46469	8642	52.2564	2	83.5339	GAGGAGAAGAAGAAGAAGCTTCTAGGCAGCTACAAGTACATCGGTGCATCGATCGACAAGGATCTGGCCACCGCGAATGATGGCGTGGCGTACTACAACAAGATGGGGGAGCTCTACAAGACGCACTTGGATGGAGTGAAAACAGAGATTAAGAAAGTCGAAGATGATATTAAAAAGCAAGATGAGGAACTTAAAAAGATAGAAAATGTTACCAGTAAAACTAGTAAAAAGAACGAATTTATTGCCAAAAAGGCCGAGCTGGAGAAGTACCTCCCGTTCCTGAATAGCCTCCAAAAGGAGTACGAGTCC	PX841050	NCBI	https://www.ncbi.nlm.nih.gov/nuccore/PX841050
ET_143	Ethiopia	2019-11-24	Symptomatic	1	M	H10	0.46469	6211	68.266	1	100	GAGGAGAAGAAGAAGAAGCTTCTAGGCAGCTACAAGTACATCGGTGCATCGATCGACAAGGATCTGGCCACCGCGAATGATGGCGTGGCGTACTACAACAAGATGGGGGAGCTCTACAAGACGCACTTGGATGGAGTGAAAACAGAGATTAAGAAAGTCGAAGATGATATTAAAAAGCAAGATGAGGAACTTAAAAAGATAGAAAATGTTACCAGTAAAACTAGTAAAAAGAACGAATTTATTGCCAAAAAGGCCGAGCTGGAGAAGTACCTCCCGTTCCTGAATAGCCTCCAAAAGGAGTACGAGTCC	PX841050	NCBI	https://www.ncbi.nlm.nih.gov/nuccore/PX841050
ET_144	Ethiopia	2019-10-30	Symptomatic	0	M	H01	0.00892495	7201	74.6702	1	100	GAGGAGAAGAAGAAGAAGCTTATAGGCAGCTACAAGTACATCGGTGCATCGATCGACATGGATCTGGCCACCGCGAATGATGGCGTGGCGTACTACAACAAGATGGAGGAGCTCTACAAGACGCACTTGGATGGAGTGAAAACAGAGATTAAGAAAGTCGAAGATGATATTAAAAAACATGATGAGAAGCTTAAAAAGATAGAAAATGAAGCCAGTAAAACTAGTGAAAAGACCCAATTGAATGCCAAAAAGGCCGAGCTGGAGAAGTACCTCCCGTTCCTGAATAGCCTCCAAAAGGAGTACGAGTCC	PX841046	NCBI	https://www.ncbi.nlm.nih.gov/nuccore/PX841046
ET_145	Ethiopia	2020-06-01	Symptomatic	0	M	H01	0.00892495	6172	71.3869	2	89.42	GAGGAGAAGAAGAAGAAGCTTATAGGCAGCTACAAGTACATCGGTGCATCGATCGACATGGATCTGGCCACCGCGAATGATGGCGTGGCGTACTACAACAAGATGGAGGAGCTCTACAAGACGCACTTGGATGGAGTGAAAACAGAGATTAAGAAAGTCGAAGATGATATTAAAAAACATGATGAGAAGCTTAAAAAGATAGAAAATGAAGCCAGTAAAACTAGTGAAAAGACCCAATTGAATGCCAAAAAGGCCGAGCTGGAGAAGTACCTCCCGTTCCTGAATAGCCTCCAAAAGGAGTACGAGTCC	PX841046	NCBI	https://www.ncbi.nlm.nih.gov/nuccore/PX841046
ET_145	Ethiopia	2020-10-03	Asymptomatic	1	M	H01	0.00892495	5694	74.3765	1	100	GAGGAGAAGAAGAAGAAGCTTATAGGCAGCTACAAGTACATCGGTGCATCGATCGACATGGATCTGGCCACCGCGAATGATGGCGTGGCGTACTACAACAAGATGGAGGAGCTCTACAAGACGCACTTGGATGGAGTGAAAACAGAGATTAAGAAAGTCGAAGATGATATTAAAAAACATGATGAGAAGCTTAAAAAGATAGAAAATGAAGCCAGTAAAACTAGTGAAAAGACCCAATTGAATGCCAAAAAGGCCGAGCTGGAGAAGTACCTCCCGTTCCTGAATAGCCTCCAAAAGGAGTACGAGTCC	PX841046	NCBI	https://www.ncbi.nlm.nih.gov/nuccore/PX841046
ET_146	Ethiopia	2020-09-30	Symptomatic	0	F	H02	0.0275049	4219	67.2434	2	96.8476	GAGGAGAAGAAGAAGAAGCTTATAGGCAGCTACAAGTACATCGGTGCATCGATCGACAAGGATCTGGCCACCGCGAATGATGGCGTGGCGTACTACAACAAGATGGAGGAGCTCTACAAGACGCACTTGACTGCAGTGAATGCACAGATTAAGAAAGTCGAAGATGATATTAAAAAACAAAATGAGGAGCTTAAAAAGATAGAAAATGAAGCCAATAAAACTGCTGAAAAGGCTAAATTTACTGCCAAAAAGGCCGAGTTGGAGAAGTACCTCCCATTCCTGAATAGCCTCCAAAAGGAGTACGAGTCC	PX841048	NCBI	https://www.ncbi.nlm.nih.gov/nuccore/PX841048
ET_147	Ethiopia	2020-09-21	Symptomatic	0	M	H02	0.0275049	5991	59.9399	1	100	GAGGAGAAGAAGAAGAAGCTTATAGGCAGCTACAAGTACATCGGTGCATCGATCGACAAGGATCTGGCCACCGCGAATGATGGCGTGGCGTACTACAACAAGATGGAGGAGCTCTACAAGACGCACTTGACTGCAGTGAATGCACAGATTAAGAAAGTCGAAGATGATATTAAAAAACAAAATGAGGAGCTTAAAAAGATAGAAAATGAAGCCAATAAAACTGCTGAAAAGGCTAAATTTACTGCCAAAAAGGCCGAGTTGGAGAAGTACCTCCCATTCCTGAATAGCCTCCAAAAGGAGTACGAGTCC	PX841048	NCBI	https://www.ncbi.nlm.nih.gov/nuccore/PX841048
ET_147	Ethiopia	2020-12-23	Asymptomatic	1	M	H48	1	207	100	1	100	GAGGAGAAGAAGAAGAAGCTTATAGGCAGCTACAAGTACATCGGTGCATCGATCGACAAGGATCTGGCCACCGCGAATGATGGCGTGGCGTACTACAACAAGATGGAGGAGCTCTATAAGACGCACTTGACTGCAGTGAATGCACAGATTAAGAAAGTCGAAGATGATATTAAAAAACAAAATGAGGAGCTTAAAAAGATAGAAAATGAAGCCAATAAAACTGCTGAAAAGGCTAAATTTACTGCCAAAAAGGCCGAGTTGGAGAAGTACCTCCCATTCCTGAATAGCCTCCAAAAGGAGTACGAGTCC	PX841064	NCBI	https://www.ncbi.nlm.nih.gov/nuccore/PX841064
ET_148	Ethiopia	2020-10-08	Symptomatic	0	M	H01	0.00892495	5414	73.8641	2	97.802	GAGGAGAAGAAGAAGAAGCTTATAGGCAGCTACAAGTACATCGGTGCATCGATCGACATGGATCTGGCCACCGCGAATGATGGCGTGGCGTACTACAACAAGATGGAGGAGCTCTACAAGACGCACTTGGATGGAGTGAAAACAGAGATTAAGAAAGTCGAAGATGATATTAAAAAACATGATGAGAAGCTTAAAAAGATAGAAAATGAAGCCAGTAAAACTAGTGAAAAGACCCAATTGAATGCCAAAAAGGCCGAGCTGGAGAAGTACCTCCCGTTCCTGAATAGCCTCCAAAAGGAGTACGAGTCC	PX841046	NCBI	https://www.ncbi.nlm.nih.gov/nuccore/PX841046
ET_149	Ethiopia	2021-05-01	Symptomatic	0	F	H02	0.0275049	4767	73.9669	1	100	GAGGAGAAGAAGAAGAAGCTTATAGGCAGCTACAAGTACATCGGTGCATCGATCGACAAGGATCTGGCCACCGCGAATGATGGCGTGGCGTACTACAACAAGATGGAGGAGCTCTACAAGACGCACTTGACTGCAGTGAATGCACAGATTAAGAAAGTCGAAGATGATATTAAAAAACAAAATGAGGAGCTTAAAAAGATAGAAAATGAAGCCAATAAAACTGCTGAAAAGGCTAAATTTACTGCCAAAAAGGCCGAGTTGGAGAAGTACCTCCCATTCCTGAATAGCCTCCAAAAGGAGTACGAGTCC	PX841048	NCBI	https://www.ncbi.nlm.nih.gov/nuccore/PX841048
ET_149	Ethiopia	2021-07-30	Symptomatic	1	F	H02	0.0275049	3679	74.667	1	100	GAGGAGAAGAAGAAGAAGCTTATAGGCAGCTACAAGTACATCGGTGCATCGATCGACAAGGATCTGGCCACCGCGAATGATGGCGTGGCGTACTACAACAAGATGGAGGAGCTCTACAAGACGCACTTGACTGCAGTGAATGCACAGATTAAGAAAGTCGAAGATGATATTAAAAAACAAAATGAGGAGCTTAAAAAGATAGAAAATGAAGCCAATAAAACTGCTGAAAAGGCTAAATTTACTGCCAAAAAGGCCGAGTTGGAGAAGTACCTCCCATTCCTGAATAGCCTCCAAAAGGAGTACGAGTCC	PX841048	NCBI	https://www.ncbi.nlm.nih.gov/nuccore/PX841048
ET_150	Ethiopia	2021-07-12	Symptomatic	0	F	H02	0.0275049	4700	77.7872	2	97.1915	GAGGAGAAGAAGAAGAAGCTTATAGGCAGCTACAAGTACATCGGTGCATCGATCGACAAGGATCTGGCCACCGCGAATGATGGCGTGGCGTACTACAACAAGATGGAGGAGCTCTACAAGACGCACTTGACTGCAGTGAATGCACAGATTAAGAAAGTCGAAGATGATATTAAAAAACAAAATGAGGAGCTTAAAAAGATAGAAAATGAAGCCAATAAAACTGCTGAAAAGGCTAAATTTACTGCCAAAAAGGCCGAGTTGGAGAAGTACCTCCCATTCCTGAATAGCCTCCAAAAGGAGTACGAGTCC	PX841048	NCBI	https://www.ncbi.nlm.nih.gov/nuccore/PX841048
ET_151	Ethiopia	2021-06-24	Symptomatic	0	M	H08	0.487496	13950	67.8208	3	94.9821	GAGGAGAAGAAGAAGAAGCTTATAGGCAGCTACAAGTACATCGGTGCATCGATCGACATGGATCTGGCCACCGCGAATGATGGCGTGGCGTACTACAACAAGATGGAGGAGCTCTACAAGACGCACTTGACTGCAGTGAATGCACAGATTAAGAAAGTCGAAGATGATATTAAAAAACAAAATGAGGAGCTTAAAAAGATAGAAAATGATACCACTAAAACTACTGAAAAGGCTAAATTTACTGCCAAAAAGGCCGAGCTGGAGAAGTACCTCCCGTTCCTGAATAGCCTCCAAAAGGAGTACGAGTCC	PX841057	NCBI	https://www.ncbi.nlm.nih.gov/nuccore/PX841057
ET_151	Ethiopia	2022-04-29	Asymptomatic	1	M	H08	0.487496	5100	70.2353	1	100	GAGGAGAAGAAGAAGAAGCTTATAGGCAGCTACAAGTACATCGGTGCATCGATCGACATGGATCTGGCCACCGCGAATGATGGCGTGGCGTACTACAACAAGATGGAGGAGCTCTACAAGACGCACTTGACTGCAGTGAATGCACAGATTAAGAAAGTCGAAGATGATATTAAAAAACAAAATGAGGAGCTTAAAAAGATAGAAAATGATACCACTAAAACTACTGAAAAGGCTAAATTTACTGCCAAAAAGGCCGAGCTGGAGAAGTACCTCCCGTTCCTGAATAGCCTCCAAAAGGAGTACGAGTCC	PX841057	NCBI	https://www.ncbi.nlm.nih.gov/nuccore/PX841057
ET_152	Ethiopia	2021-05-10	Symptomatic	0	M	H01	0.00892495	4181	74.5515	1	100	GAGGAGAAGAAGAAGAAGCTTATAGGCAGCTACAAGTACATCGGTGCATCGATCGACATGGATCTGGCCACCGCGAATGATGGCGTGGCGTACTACAACAAGATGGAGGAGCTCTACAAGACGCACTTGGATGGAGTGAAAACAGAGATTAAGAAAGTCGAAGATGATATTAAAAAACATGATGAGAAGCTTAAAAAGATAGAAAATGAAGCCAGTAAAACTAGTGAAAAGACCCAATTGAATGCCAAAAAGGCCGAGCTGGAGAAGTACCTCCCGTTCCTGAATAGCCTCCAAAAGGAGTACGAGTCC	PX841046	NCBI	https://www.ncbi.nlm.nih.gov/nuccore/PX841046
ET_153	Ethiopia	2021-05-16	Symptomatic	0	M	H03	0.0231214	4068	43.9528	2	60.4228	GAGGAGAAGAAGAAGAAGCTTATAGGCAGCTACAAGTACATCGGTGCATCGATCGACATGGATCTGGCCACCGCGAATGATGGCGTGGCGTACTACAACAAGATGGAGGAGCTCTACAAGACGCACTTGACTGCAGTGAATGAAGAGGTTAAGAAAGTCGAAGCTGATATTAAAAAAGAAGATGATAAGATTAAAAAGATAGAAAATGATACCACTAAAACTACTGAAAAGACCCAATCGATGGCCAAAAAGGCCGAGCTGGAGAAGTACCTCCCGTTCCTGAATAGCCTCCAAAAGGAGTACGAGTCC	PX841052	NCBI	https://www.ncbi.nlm.nih.gov/nuccore/PX841052
ET_154	Ethiopia	2021-05-20	Symptomatic	0	M	H06	0.0245161	3291	65.8159	1	100	GAGGAGAAGAAGAAGAAGCTTCTAGGCAGCTACAAGTACATCGGTGCATCGATCGACAAGGATCTGGCCACCGCGAATGATGGCGTGACCTACTACAACAAGATGGGGGAGCTCTACAAGACGCACTTGGATGGAGTGAAAACAGAGATTAAGAAAGTCGAAGATGATATTAAAAAGCAAGATGAGGAACTTAAAAAGATAGAAAATGTTACCAGTAAAACTAGTAAAAAGAACGAATTTATTGCCAAAAAGGCCGAGCTGGAGAAGTACCTCCCGTTCCTGAATAGCCTCCAAAAGGAGTACGAGTCC	PX841051	NCBI	https://www.ncbi.nlm.nih.gov/nuccore/PX841051
ET_155	Ethiopia	2020-11-01	Symptomatic	0	M	H01	0.00892495	5556	68.7185	1	100	GAGGAGAAGAAGAAGAAGCTTATAGGCAGCTACAAGTACATCGGTGCATCGATCGACATGGATCTGGCCACCGCGAATGATGGCGTGGCGTACTACAACAAGATGGAGGAGCTCTACAAGACGCACTTGGATGGAGTGAAAACAGAGATTAAGAAAGTCGAAGATGATATTAAAAAACATGATGAGAAGCTTAAAAAGATAGAAAATGAAGCCAGTAAAACTAGTGAAAAGACCCAATTGAATGCCAAAAAGGCCGAGCTGGAGAAGTACCTCCCGTTCCTGAATAGCCTCCAAAAGGAGTACGAGTCC	PX841046	NCBI	https://www.ncbi.nlm.nih.gov/nuccore/PX841046
ET_155	Ethiopia	2021-01-25	Symptomatic	1	M	H01	0.00892495	14334	73.2105	2	97.1118	GAGGAGAAGAAGAAGAAGCTTATAGGCAGCTACAAGTACATCGGTGCATCGATCGACATGGATCTGGCCACCGCGAATGATGGCGTGGCGTACTACAACAAGATGGAGGAGCTCTACAAGACGCACTTGGATGGAGTGAAAACAGAGATTAAGAAAGTCGAAGATGATATTAAAAAACATGATGAGAAGCTTAAAAAGATAGAAAATGAAGCCAGTAAAACTAGTGAAAAGACCCAATTGAATGCCAAAAAGGCCGAGCTGGAGAAGTACCTCCCGTTCCTGAATAGCCTCCAAAAGGAGTACGAGTCC	PX841046	NCBI	https://www.ncbi.nlm.nih.gov/nuccore/PX841046
ET_155	Ethiopia	2021-04-03	Symptomatic	2	M	H01	0.00892495	7351	73.2825	1	100	GAGGAGAAGAAGAAGAAGCTTATAGGCAGCTACAAGTACATCGGTGCATCGATCGACATGGATCTGGCCACCGCGAATGATGGCGTGGCGTACTACAACAAGATGGAGGAGCTCTACAAGACGCACTTGGATGGAGTGAAAACAGAGATTAAGAAAGTCGAAGATGATATTAAAAAACATGATGAGAAGCTTAAAAAGATAGAAAATGAAGCCAGTAAAACTAGTGAAAAGACCCAATTGAATGCCAAAAAGGCCGAGCTGGAGAAGTACCTCCCGTTCCTGAATAGCCTCCAAAAGGAGTACGAGTCC	PX841046	NCBI	https://www.ncbi.nlm.nih.gov/nuccore/PX841046
ET_156	Ethiopia	2020-10-18	Symptomatic	0	F	H02	0.0275049	8822	68.7713	1	100	GAGGAGAAGAAGAAGAAGCTTATAGGCAGCTACAAGTACATCGGTGCATCGATCGACAAGGATCTGGCCACCGCGAATGATGGCGTGGCGTACTACAACAAGATGGAGGAGCTCTACAAGACGCACTTGACTGCAGTGAATGCACAGATTAAGAAAGTCGAAGATGATATTAAAAAACAAAATGAGGAGCTTAAAAAGATAGAAAATGAAGCCAATAAAACTGCTGAAAAGGCTAAATTTACTGCCAAAAAGGCCGAGTTGGAGAAGTACCTCCCATTCCTGAATAGCCTCCAAAAGGAGTACGAGTCC	PX841048	NCBI	https://www.ncbi.nlm.nih.gov/nuccore/PX841048
ET_156	Ethiopia	2021-01-15	Asymptomatic	1	F	H02	0.0275049	3575	70.1538	1	100	GAGGAGAAGAAGAAGAAGCTTATAGGCAGCTACAAGTACATCGGTGCATCGATCGACAAGGATCTGGCCACCGCGAATGATGGCGTGGCGTACTACAACAAGATGGAGGAGCTCTACAAGACGCACTTGACTGCAGTGAATGCACAGATTAAGAAAGTCGAAGATGATATTAAAAAACAAAATGAGGAGCTTAAAAAGATAGAAAATGAAGCCAATAAAACTGCTGAAAAGGCTAAATTTACTGCCAAAAAGGCCGAGTTGGAGAAGTACCTCCCATTCCTGAATAGCCTCCAAAAGGAGTACGAGTCC	PX841048	NCBI	https://www.ncbi.nlm.nih.gov/nuccore/PX841048
ET_157	Ethiopia	2020-10-20	Symptomatic	0	F	H01	0.00892495	13746	72.3483	1	100	GAGGAGAAGAAGAAGAAGCTTATAGGCAGCTACAAGTACATCGGTGCATCGATCGACATGGATCTGGCCACCGCGAATGATGGCGTGGCGTACTACAACAAGATGGAGGAGCTCTACAAGACGCACTTGGATGGAGTGAAAACAGAGATTAAGAAAGTCGAAGATGATATTAAAAAACATGATGAGAAGCTTAAAAAGATAGAAAATGAAGCCAGTAAAACTAGTGAAAAGACCCAATTGAATGCCAAAAAGGCCGAGCTGGAGAAGTACCTCCCGTTCCTGAATAGCCTCCAAAAGGAGTACGAGTCC	PX841046	NCBI	https://www.ncbi.nlm.nih.gov/nuccore/PX841046
ET_157	Ethiopia	2020-12-23	Asymptomatic	1	F	H01	0.00892495	10691	64.0913	1	100	GAGGAGAAGAAGAAGAAGCTTATAGGCAGCTACAAGTACATCGGTGCATCGATCGACATGGATCTGGCCACCGCGAATGATGGCGTGGCGTACTACAACAAGATGGAGGAGCTCTACAAGACGCACTTGGATGGAGTGAAAACAGAGATTAAGAAAGTCGAAGATGATATTAAAAAACATGATGAGAAGCTTAAAAAGATAGAAAATGAAGCCAGTAAAACTAGTGAAAAGACCCAATTGAATGCCAAAAAGGCCGAGCTGGAGAAGTACCTCCCGTTCCTGAATAGCCTCCAAAAGGAGTACGAGTCC	PX841046	NCBI	https://www.ncbi.nlm.nih.gov/nuccore/PX841046
ET_157	Ethiopia	2021-02-12	Asymptomatic	2	F	H01	0.00892495	1817	58.503	1	100	GAGGAGAAGAAGAAGAAGCTTATAGGCAGCTACAAGTACATCGGTGCATCGATCGACATGGATCTGGCCACCGCGAATGATGGCGTGGCGTACTACAACAAGATGGAGGAGCTCTACAAGACGCACTTGGATGGAGTGAAAACAGAGATTAAGAAAGTCGAAGATGATATTAAAAAACATGATGAGAAGCTTAAAAAGATAGAAAATGAAGCCAGTAAAACTAGTGAAAAGACCCAATTGAATGCCAAAAAGGCCGAGCTGGAGAAGTACCTCCCGTTCCTGAATAGCCTCCAAAAGGAGTACGAGTCC	PX841046	NCBI	https://www.ncbi.nlm.nih.gov/nuccore/PX841046
ET_158	Ethiopia	2020-10-14	Symptomatic	0	M	H02	0.0275049	3711	75.7208	1	100	GAGGAGAAGAAGAAGAAGCTTATAGGCAGCTACAAGTACATCGGTGCATCGATCGACAAGGATCTGGCCACCGCGAATGATGGCGTGGCGTACTACAACAAGATGGAGGAGCTCTACAAGACGCACTTGACTGCAGTGAATGCACAGATTAAGAAAGTCGAAGATGATATTAAAAAACAAAATGAGGAGCTTAAAAAGATAGAAAATGAAGCCAATAAAACTGCTGAAAAGGCTAAATTTACTGCCAAAAAGGCCGAGTTGGAGAAGTACCTCCCATTCCTGAATAGCCTCCAAAAGGAGTACGAGTCC	PX841048	NCBI	https://www.ncbi.nlm.nih.gov/nuccore/PX841048
ET_158	Ethiopia	2020-11-12	Asymptomatic	1	M	H01	0.00892495	6475	65.6834	1	100	GAGGAGAAGAAGAAGAAGCTTATAGGCAGCTACAAGTACATCGGTGCATCGATCGACATGGATCTGGCCACCGCGAATGATGGCGTGGCGTACTACAACAAGATGGAGGAGCTCTACAAGACGCACTTGGATGGAGTGAAAACAGAGATTAAGAAAGTCGAAGATGATATTAAAAAACATGATGAGAAGCTTAAAAAGATAGAAAATGAAGCCAGTAAAACTAGTGAAAAGACCCAATTGAATGCCAAAAAGGCCGAGCTGGAGAAGTACCTCCCGTTCCTGAATAGCCTCCAAAAGGAGTACGAGTCC	PX841046	NCBI	https://www.ncbi.nlm.nih.gov/nuccore/PX841046
ET_158	Ethiopia	2021-02-16	Asymptomatic	2	M	H02	0.0275049	12593	72.8182	1	100	GAGGAGAAGAAGAAGAAGCTTATAGGCAGCTACAAGTACATCGGTGCATCGATCGACAAGGATCTGGCCACCGCGAATGATGGCGTGGCGTACTACAACAAGATGGAGGAGCTCTACAAGACGCACTTGACTGCAGTGAATGCACAGATTAAGAAAGTCGAAGATGATATTAAAAAACAAAATGAGGAGCTTAAAAAGATAGAAAATGAAGCCAATAAAACTGCTGAAAAGGCTAAATTTACTGCCAAAAAGGCCGAGTTGGAGAAGTACCTCCCATTCCTGAATAGCCTCCAAAAGGAGTACGAGTCC	PX841048	NCBI	https://www.ncbi.nlm.nih.gov/nuccore/PX841048
ET_159	Ethiopia	2020-09-22	Symptomatic	0	M	H01	0.00892495	7239	64.1663	1	100	GAGGAGAAGAAGAAGAAGCTTATAGGCAGCTACAAGTACATCGGTGCATCGATCGACATGGATCTGGCCACCGCGAATGATGGCGTGGCGTACTACAACAAGATGGAGGAGCTCTACAAGACGCACTTGGATGGAGTGAAAACAGAGATTAAGAAAGTCGAAGATGATATTAAAAAACATGATGAGAAGCTTAAAAAGATAGAAAATGAAGCCAGTAAAACTAGTGAAAAGACCCAATTGAATGCCAAAAAGGCCGAGCTGGAGAAGTACCTCCCGTTCCTGAATAGCCTCCAAAAGGAGTACGAGTCC	PX841046	NCBI	https://www.ncbi.nlm.nih.gov/nuccore/PX841046
ET_159	Ethiopia	2021-04-08	Asymptomatic	1	M	H01	0.00892495	7424	59.8464	2	90.1805	GAGGAGAAGAAGAAGAAGCTTATAGGCAGCTACAAGTACATCGGTGCATCGATCGACATGGATCTGGCCACCGCGAATGATGGCGTGGCGTACTACAACAAGATGGAGGAGCTCTACAAGACGCACTTGGATGGAGTGAAAACAGAGATTAAGAAAGTCGAAGATGATATTAAAAAACATGATGAGAAGCTTAAAAAGATAGAAAATGAAGCCAGTAAAACTAGTGAAAAGACCCAATTGAATGCCAAAAAGGCCGAGCTGGAGAAGTACCTCCCGTTCCTGAATAGCCTCCAAAAGGAGTACGAGTCC	PX841046	NCBI	https://www.ncbi.nlm.nih.gov/nuccore/PX841046
ET_159	Ethiopia	2021-09-25	Asymptomatic	2	M	H01	0.00892495	6502	68.1636	1	100	GAGGAGAAGAAGAAGAAGCTTATAGGCAGCTACAAGTACATCGGTGCATCGATCGACATGGATCTGGCCACCGCGAATGATGGCGTGGCGTACTACAACAAGATGGAGGAGCTCTACAAGACGCACTTGGATGGAGTGAAAACAGAGATTAAGAAAGTCGAAGATGATATTAAAAAACATGATGAGAAGCTTAAAAAGATAGAAAATGAAGCCAGTAAAACTAGTGAAAAGACCCAATTGAATGCCAAAAAGGCCGAGCTGGAGAAGTACCTCCCGTTCCTGAATAGCCTCCAAAAGGAGTACGAGTCC	PX841046	NCBI	https://www.ncbi.nlm.nih.gov/nuccore/PX841046
ET_160	Ethiopia	2020-09-23	Symptomatic	0	M	H02	0.0275049	4346	73.861	1	100	GAGGAGAAGAAGAAGAAGCTTATAGGCAGCTACAAGTACATCGGTGCATCGATCGACAAGGATCTGGCCACCGCGAATGATGGCGTGGCGTACTACAACAAGATGGAGGAGCTCTACAAGACGCACTTGACTGCAGTGAATGCACAGATTAAGAAAGTCGAAGATGATATTAAAAAACAAAATGAGGAGCTTAAAAAGATAGAAAATGAAGCCAATAAAACTGCTGAAAAGGCTAAATTTACTGCCAAAAAGGCCGAGTTGGAGAAGTACCTCCCATTCCTGAATAGCCTCCAAAAGGAGTACGAGTCC	PX841048	NCBI	https://www.ncbi.nlm.nih.gov/nuccore/PX841048
ET_160	Ethiopia	2021-03-10	Asymptomatic	1	M	H02	0.0275049	8288	66.7954	2	95.5357	GAGGAGAAGAAGAAGAAGCTTATAGGCAGCTACAAGTACATCGGTGCATCGATCGACAAGGATCTGGCCACCGCGAATGATGGCGTGGCGTACTACAACAAGATGGAGGAGCTCTACAAGACGCACTTGACTGCAGTGAATGCACAGATTAAGAAAGTCGAAGATGATATTAAAAAACAAAATGAGGAGCTTAAAAAGATAGAAAATGAAGCCAATAAAACTGCTGAAAAGGCTAAATTTACTGCCAAAAAGGCCGAGTTGGAGAAGTACCTCCCATTCCTGAATAGCCTCCAAAAGGAGTACGAGTCC	PX841048	NCBI	https://www.ncbi.nlm.nih.gov/nuccore/PX841048
ET_161	Ethiopia	2020-10-06	Symptomatic	0	M	H01	0.00892495	6120	76.2582	1	100	GAGGAGAAGAAGAAGAAGCTTATAGGCAGCTACAAGTACATCGGTGCATCGATCGACATGGATCTGGCCACCGCGAATGATGGCGTGGCGTACTACAACAAGATGGAGGAGCTCTACAAGACGCACTTGGATGGAGTGAAAACAGAGATTAAGAAAGTCGAAGATGATATTAAAAAACATGATGAGAAGCTTAAAAAGATAGAAAATGAAGCCAGTAAAACTAGTGAAAAGACCCAATTGAATGCCAAAAAGGCCGAGCTGGAGAAGTACCTCCCGTTCCTGAATAGCCTCCAAAAGGAGTACGAGTCC	PX841046	NCBI	https://www.ncbi.nlm.nih.gov/nuccore/PX841046
ET_161	Ethiopia	2020-11-28	Asymptomatic	1	M	H01	0.00892495	9752	66.8068	3	95.324	GAGGAGAAGAAGAAGAAGCTTATAGGCAGCTACAAGTACATCGGTGCATCGATCGACATGGATCTGGCCACCGCGAATGATGGCGTGGCGTACTACAACAAGATGGAGGAGCTCTACAAGACGCACTTGGATGGAGTGAAAACAGAGATTAAGAAAGTCGAAGATGATATTAAAAAACATGATGAGAAGCTTAAAAAGATAGAAAATGAAGCCAGTAAAACTAGTGAAAAGACCCAATTGAATGCCAAAAAGGCCGAGCTGGAGAAGTACCTCCCGTTCCTGAATAGCCTCCAAAAGGAGTACGAGTCC	PX841046	NCBI	https://www.ncbi.nlm.nih.gov/nuccore/PX841046
ET_161	Ethiopia	2021-01-29	Asymptomatic	2	M	H01	0.00892495	12583	64.1898	2	95.2158	GAGGAGAAGAAGAAGAAGCTTATAGGCAGCTACAAGTACATCGGTGCATCGATCGACATGGATCTGGCCACCGCGAATGATGGCGTGGCGTACTACAACAAGATGGAGGAGCTCTACAAGACGCACTTGGATGGAGTGAAAACAGAGATTAAGAAAGTCGAAGATGATATTAAAAAACATGATGAGAAGCTTAAAAAGATAGAAAATGAAGCCAGTAAAACTAGTGAAAAGACCCAATTGAATGCCAAAAAGGCCGAGCTGGAGAAGTACCTCCCGTTCCTGAATAGCCTCCAAAAGGAGTACGAGTCC	PX841046	NCBI	https://www.ncbi.nlm.nih.gov/nuccore/PX841046
ET_162	Ethiopia	2020-10-27	Symptomatic	0	M	H02	0.0275049	3543	76.2631	1	100	GAGGAGAAGAAGAAGAAGCTTATAGGCAGCTACAAGTACATCGGTGCATCGATCGACAAGGATCTGGCCACCGCGAATGATGGCGTGGCGTACTACAACAAGATGGAGGAGCTCTACAAGACGCACTTGACTGCAGTGAATGCACAGATTAAGAAAGTCGAAGATGATATTAAAAAACAAAATGAGGAGCTTAAAAAGATAGAAAATGAAGCCAATAAAACTGCTGAAAAGGCTAAATTTACTGCCAAAAAGGCCGAGTTGGAGAAGTACCTCCCATTCCTGAATAGCCTCCAAAAGGAGTACGAGTCC	PX841048	NCBI	https://www.ncbi.nlm.nih.gov/nuccore/PX841048
ET_162	Ethiopia	2021-02-23	Asymptomatic	1	M	H02	0.0275049	8333	64.3586	1	100	GAGGAGAAGAAGAAGAAGCTTATAGGCAGCTACAAGTACATCGGTGCATCGATCGACAAGGATCTGGCCACCGCGAATGATGGCGTGGCGTACTACAACAAGATGGAGGAGCTCTACAAGACGCACTTGACTGCAGTGAATGCACAGATTAAGAAAGTCGAAGATGATATTAAAAAACAAAATGAGGAGCTTAAAAAGATAGAAAATGAAGCCAATAAAACTGCTGAAAAGGCTAAATTTACTGCCAAAAAGGCCGAGTTGGAGAAGTACCTCCCATTCCTGAATAGCCTCCAAAAGGAGTACGAGTCC	PX841048	NCBI	https://www.ncbi.nlm.nih.gov/nuccore/PX841048
ET_162	Ethiopia	2021-04-23	Asymptomatic	2	M	H02	0.0275049	12434	59.9807	1	100	GAGGAGAAGAAGAAGAAGCTTATAGGCAGCTACAAGTACATCGGTGCATCGATCGACAAGGATCTGGCCACCGCGAATGATGGCGTGGCGTACTACAACAAGATGGAGGAGCTCTACAAGACGCACTTGACTGCAGTGAATGCACAGATTAAGAAAGTCGAAGATGATATTAAAAAACAAAATGAGGAGCTTAAAAAGATAGAAAATGAAGCCAATAAAACTGCTGAAAAGGCTAAATTTACTGCCAAAAAGGCCGAGTTGGAGAAGTACCTCCCATTCCTGAATAGCCTCCAAAAGGAGTACGAGTCC	PX841048	NCBI	https://www.ncbi.nlm.nih.gov/nuccore/PX841048
ET_163	Ethiopia	2021-05-20	Symptomatic	0	M	H15	0.16244	2360	67.6271	2	77.7119	GAGGAGAAGAAGAAGAAGCTTATAGGCAGCTACAAGTACATCGGTGCATCGATCGACATGGATCTGGCCACCGCGAATGATGGCGTGGCGTACTACAACAAGATGGGGGAGCTCTACAAGACGCACTTGGATGGAGTGAAAACAGAGATTAAGAAAGTCGAAGATGATATTAAAAAGCAAGATGAGGAACTTAAAAAGATAGAAAATGTTACCAGTAAAACTAGTAAAAAGAACGAATTTATTGCCAAAAAGGCCGAGCTGGAGAAGTACCTCCCGTTCCTGAATAGCCTCCAAAAGGAGTACGAGTCC	PX841060	NCBI	https://www.ncbi.nlm.nih.gov/nuccore/PX841060
ET_163	Ethiopia	2021-06-23	Asymptomatic	1	M	H03	0.0231214	4180	56.5789	2	83.756	GAGGAGAAGAAGAAGAAGCTTATAGGCAGCTACAAGTACATCGGTGCATCGATCGACATGGATCTGGCCACCGCGAATGATGGCGTGGCGTACTACAACAAGATGGAGGAGCTCTACAAGACGCACTTGACTGCAGTGAATGAAGAGGTTAAGAAAGTCGAAGCTGATATTAAAAAAGAAGATGATAAGATTAAAAAGATAGAAAATGATACCACTAAAACTACTGAAAAGACCCAATCGATGGCCAAAAAGGCCGAGCTGGAGAAGTACCTCCCGTTCCTGAATAGCCTCCAAAAGGAGTACGAGTCC	PX841052	NCBI	https://www.ncbi.nlm.nih.gov/nuccore/PX841052
ET_164	Ethiopia	2021-07-09	Symptomatic	0	M	H02	0.0275049	4074	75.2577	1	100	GAGGAGAAGAAGAAGAAGCTTATAGGCAGCTACAAGTACATCGGTGCATCGATCGACAAGGATCTGGCCACCGCGAATGATGGCGTGGCGTACTACAACAAGATGGAGGAGCTCTACAAGACGCACTTGACTGCAGTGAATGCACAGATTAAGAAAGTCGAAGATGATATTAAAAAACAAAATGAGGAGCTTAAAAAGATAGAAAATGAAGCCAATAAAACTGCTGAAAAGGCTAAATTTACTGCCAAAAAGGCCGAGTTGGAGAAGTACCTCCCATTCCTGAATAGCCTCCAAAAGGAGTACGAGTCC	PX841048	NCBI	https://www.ncbi.nlm.nih.gov/nuccore/PX841048
ET_164	Ethiopia	2021-08-07	Asymptomatic	1	M	H02	0.0275049	12922	66.8395	2	97.3766	GAGGAGAAGAAGAAGAAGCTTATAGGCAGCTACAAGTACATCGGTGCATCGATCGACAAGGATCTGGCCACCGCGAATGATGGCGTGGCGTACTACAACAAGATGGAGGAGCTCTACAAGACGCACTTGACTGCAGTGAATGCACAGATTAAGAAAGTCGAAGATGATATTAAAAAACAAAATGAGGAGCTTAAAAAGATAGAAAATGAAGCCAATAAAACTGCTGAAAAGGCTAAATTTACTGCCAAAAAGGCCGAGTTGGAGAAGTACCTCCCATTCCTGAATAGCCTCCAAAAGGAGTACGAGTCC	PX841048	NCBI	https://www.ncbi.nlm.nih.gov/nuccore/PX841048
ET_164	Ethiopia	2021-09-22	Asymptomatic	2	M	H01	0.00892495	5677	74.4055	1	100	GAGGAGAAGAAGAAGAAGCTTATAGGCAGCTACAAGTACATCGGTGCATCGATCGACATGGATCTGGCCACCGCGAATGATGGCGTGGCGTACTACAACAAGATGGAGGAGCTCTACAAGACGCACTTGGATGGAGTGAAAACAGAGATTAAGAAAGTCGAAGATGATATTAAAAAACATGATGAGAAGCTTAAAAAGATAGAAAATGAAGCCAGTAAAACTAGTGAAAAGACCCAATTGAATGCCAAAAAGGCCGAGCTGGAGAAGTACCTCCCGTTCCTGAATAGCCTCCAAAAGGAGTACGAGTCC	PX841046	NCBI	https://www.ncbi.nlm.nih.gov/nuccore/PX841046
ET_164	Ethiopia	2021-10-31	Asymptomatic	3	M	H01	0.00892495	5982	78.5858	1	100	GAGGAGAAGAAGAAGAAGCTTATAGGCAGCTACAAGTACATCGGTGCATCGATCGACATGGATCTGGCCACCGCGAATGATGGCGTGGCGTACTACAACAAGATGGAGGAGCTCTACAAGACGCACTTGGATGGAGTGAAAACAGAGATTAAGAAAGTCGAAGATGATATTAAAAAACATGATGAGAAGCTTAAAAAGATAGAAAATGAAGCCAGTAAAACTAGTGAAAAGACCCAATTGAATGCCAAAAAGGCCGAGCTGGAGAAGTACCTCCCGTTCCTGAATAGCCTCCAAAAGGAGTACGAGTCC	PX841046	NCBI	https://www.ncbi.nlm.nih.gov/nuccore/PX841046
ET_165	Ethiopia	2021-07-03	Symptomatic	0	M	H02	0.0275049	8801	67.9695	1	100	GAGGAGAAGAAGAAGAAGCTTATAGGCAGCTACAAGTACATCGGTGCATCGATCGACAAGGATCTGGCCACCGCGAATGATGGCGTGGCGTACTACAACAAGATGGAGGAGCTCTACAAGACGCACTTGACTGCAGTGAATGCACAGATTAAGAAAGTCGAAGATGATATTAAAAAACAAAATGAGGAGCTTAAAAAGATAGAAAATGAAGCCAATAAAACTGCTGAAAAGGCTAAATTTACTGCCAAAAAGGCCGAGTTGGAGAAGTACCTCCCATTCCTGAATAGCCTCCAAAAGGAGTACGAGTCC	PX841048	NCBI	https://www.ncbi.nlm.nih.gov/nuccore/PX841048
ET_165	Ethiopia	2021-09-23	Asymptomatic	1	M	H01	0.00892495	3662	70.9175	1	100	GAGGAGAAGAAGAAGAAGCTTATAGGCAGCTACAAGTACATCGGTGCATCGATCGACATGGATCTGGCCACCGCGAATGATGGCGTGGCGTACTACAACAAGATGGAGGAGCTCTACAAGACGCACTTGGATGGAGTGAAAACAGAGATTAAGAAAGTCGAAGATGATATTAAAAAACATGATGAGAAGCTTAAAAAGATAGAAAATGAAGCCAGTAAAACTAGTGAAAAGACCCAATTGAATGCCAAAAAGGCCGAGCTGGAGAAGTACCTCCCGTTCCTGAATAGCCTCCAAAAGGAGTACGAGTCC	PX841046	NCBI	https://www.ncbi.nlm.nih.gov/nuccore/PX841046
ET_165	Ethiopia	2021-12-03	Asymptomatic	2	M	H01	0.00892495	10688	74.4199	1	100	GAGGAGAAGAAGAAGAAGCTTATAGGCAGCTACAAGTACATCGGTGCATCGATCGACATGGATCTGGCCACCGCGAATGATGGCGTGGCGTACTACAACAAGATGGAGGAGCTCTACAAGACGCACTTGGATGGAGTGAAAACAGAGATTAAGAAAGTCGAAGATGATATTAAAAAACATGATGAGAAGCTTAAAAAGATAGAAAATGAAGCCAGTAAAACTAGTGAAAAGACCCAATTGAATGCCAAAAAGGCCGAGCTGGAGAAGTACCTCCCGTTCCTGAATAGCCTCCAAAAGGAGTACGAGTCC	PX841046	NCBI	https://www.ncbi.nlm.nih.gov/nuccore/PX841046
ET_165	Ethiopia	2022-05-09	Asymptomatic	3	M	H01	0.00892495	7207	76.8142	1	100	GAGGAGAAGAAGAAGAAGCTTATAGGCAGCTACAAGTACATCGGTGCATCGATCGACATGGATCTGGCCACCGCGAATGATGGCGTGGCGTACTACAACAAGATGGAGGAGCTCTACAAGACGCACTTGGATGGAGTGAAAACAGAGATTAAGAAAGTCGAAGATGATATTAAAAAACATGATGAGAAGCTTAAAAAGATAGAAAATGAAGCCAGTAAAACTAGTGAAAAGACCCAATTGAATGCCAAAAAGGCCGAGCTGGAGAAGTACCTCCCGTTCCTGAATAGCCTCCAAAAGGAGTACGAGTCC	PX841046	NCBI	https://www.ncbi.nlm.nih.gov/nuccore/PX841046
ET_166	Ethiopia	2020-10-14	Symptomatic	0	M	H03	0.0231214	6469	75.514	2	98.1295	GAGGAGAAGAAGAAGAAGCTTATAGGCAGCTACAAGTACATCGGTGCATCGATCGACATGGATCTGGCCACCGCGAATGATGGCGTGGCGTACTACAACAAGATGGAGGAGCTCTACAAGACGCACTTGACTGCAGTGAATGAAGAGGTTAAGAAAGTCGAAGCTGATATTAAAAAAGAAGATGATAAGATTAAAAAGATAGAAAATGATACCACTAAAACTACTGAAAAGACCCAATCGATGGCCAAAAAGGCCGAGCTGGAGAAGTACCTCCCGTTCCTGAATAGCCTCCAAAAGGAGTACGAGTCC	PX841052	NCBI	https://www.ncbi.nlm.nih.gov/nuccore/PX841052
ET_166	Ethiopia	2021-01-27	Asymptomatic	1	M	H01	0.00892495	4454	71.868	1	100	GAGGAGAAGAAGAAGAAGCTTATAGGCAGCTACAAGTACATCGGTGCATCGATCGACATGGATCTGGCCACCGCGAATGATGGCGTGGCGTACTACAACAAGATGGAGGAGCTCTACAAGACGCACTTGGATGGAGTGAAAACAGAGATTAAGAAAGTCGAAGATGATATTAAAAAACATGATGAGAAGCTTAAAAAGATAGAAAATGAAGCCAGTAAAACTAGTGAAAAGACCCAATTGAATGCCAAAAAGGCCGAGCTGGAGAAGTACCTCCCGTTCCTGAATAGCCTCCAAAAGGAGTACGAGTCC	PX841046	NCBI	https://www.ncbi.nlm.nih.gov/nuccore/PX841046
ET_166	Ethiopia	2021-03-17	Asymptomatic	2	M	H02	0.0275049	7564	84.2411	1	100	GAGGAGAAGAAGAAGAAGCTTATAGGCAGCTACAAGTACATCGGTGCATCGATCGACAAGGATCTGGCCACCGCGAATGATGGCGTGGCGTACTACAACAAGATGGAGGAGCTCTACAAGACGCACTTGACTGCAGTGAATGCACAGATTAAGAAAGTCGAAGATGATATTAAAAAACAAAATGAGGAGCTTAAAAAGATAGAAAATGAAGCCAATAAAACTGCTGAAAAGGCTAAATTTACTGCCAAAAAGGCCGAGTTGGAGAAGTACCTCCCATTCCTGAATAGCCTCCAAAAGGAGTACGAGTCC	PX841048	NCBI	https://www.ncbi.nlm.nih.gov/nuccore/PX841048
ET_166	Ethiopia	2021-07-30	Asymptomatic	3	M	H02	0.0275049	6609	64.5332	1	100	GAGGAGAAGAAGAAGAAGCTTATAGGCAGCTACAAGTACATCGGTGCATCGATCGACAAGGATCTGGCCACCGCGAATGATGGCGTGGCGTACTACAACAAGATGGAGGAGCTCTACAAGACGCACTTGACTGCAGTGAATGCACAGATTAAGAAAGTCGAAGATGATATTAAAAAACAAAATGAGGAGCTTAAAAAGATAGAAAATGAAGCCAATAAAACTGCTGAAAAGGCTAAATTTACTGCCAAAAAGGCCGAGTTGGAGAAGTACCTCCCATTCCTGAATAGCCTCCAAAAGGAGTACGAGTCC	PX841048	NCBI	https://www.ncbi.nlm.nih.gov/nuccore/PX841048
ET_167	Ethiopia	2020-10-30	Symptomatic	0	F	H01	0.00892495	11767	65.2163	1	100	GAGGAGAAGAAGAAGAAGCTTATAGGCAGCTACAAGTACATCGGTGCATCGATCGACATGGATCTGGCCACCGCGAATGATGGCGTGGCGTACTACAACAAGATGGAGGAGCTCTACAAGACGCACTTGGATGGAGTGAAAACAGAGATTAAGAAAGTCGAAGATGATATTAAAAAACATGATGAGAAGCTTAAAAAGATAGAAAATGAAGCCAGTAAAACTAGTGAAAAGACCCAATTGAATGCCAAAAAGGCCGAGCTGGAGAAGTACCTCCCGTTCCTGAATAGCCTCCAAAAGGAGTACGAGTCC	PX841046	NCBI	https://www.ncbi.nlm.nih.gov/nuccore/PX841046
ET_167	Ethiopia	2020-12-18	Asymptomatic	1	F	H01	0.00892495	5681	75.2332	1	100	GAGGAGAAGAAGAAGAAGCTTATAGGCAGCTACAAGTACATCGGTGCATCGATCGACATGGATCTGGCCACCGCGAATGATGGCGTGGCGTACTACAACAAGATGGAGGAGCTCTACAAGACGCACTTGGATGGAGTGAAAACAGAGATTAAGAAAGTCGAAGATGATATTAAAAAACATGATGAGAAGCTTAAAAAGATAGAAAATGAAGCCAGTAAAACTAGTGAAAAGACCCAATTGAATGCCAAAAAGGCCGAGCTGGAGAAGTACCTCCCGTTCCTGAATAGCCTCCAAAAGGAGTACGAGTCC	PX841046	NCBI	https://www.ncbi.nlm.nih.gov/nuccore/PX841046
ET_168	Ethiopia	2021-01-21	Symptomatic	0	F	H03	0.0231214	1708	100	1	100	GAGGAGAAGAAGAAGAAGCTTATAGGCAGCTACAAGTACATCGGTGCATCGATCGACATGGATCTGGCCACCGCGAATGATGGCGTGGCGTACTACAACAAGATGGAGGAGCTCTACAAGACGCACTTGACTGCAGTGAATGAAGAGGTTAAGAAAGTCGAAGCTGATATTAAAAAAGAAGATGATAAGATTAAAAAGATAGAAAATGATACCACTAAAACTACTGAAAAGACCCAATCGATGGCCAAAAAGGCCGAGCTGGAGAAGTACCTCCCGTTCCTGAATAGCCTCCAAAAGGAGTACGAGTCC	PX841052	NCBI	https://www.ncbi.nlm.nih.gov/nuccore/PX841052
ET_168	Ethiopia	2021-03-15	Symptomatic	1	F	H03	0.0231214	9519	57.2539	2	85.6918	GAGGAGAAGAAGAAGAAGCTTATAGGCAGCTACAAGTACATCGGTGCATCGATCGACATGGATCTGGCCACCGCGAATGATGGCGTGGCGTACTACAACAAGATGGAGGAGCTCTACAAGACGCACTTGACTGCAGTGAATGAAGAGGTTAAGAAAGTCGAAGCTGATATTAAAAAAGAAGATGATAAGATTAAAAAGATAGAAAATGATACCACTAAAACTACTGAAAAGACCCAATCGATGGCCAAAAAGGCCGAGCTGGAGAAGTACCTCCCGTTCCTGAATAGCCTCCAAAAGGAGTACGAGTCC	PX841052	NCBI	https://www.ncbi.nlm.nih.gov/nuccore/PX841052
ET_168	Ethiopia	2021-05-20	Asymptomatic	2	F	H03	0.0231214	1414	69.7313	1	100	GAGGAGAAGAAGAAGAAGCTTATAGGCAGCTACAAGTACATCGGTGCATCGATCGACATGGATCTGGCCACCGCGAATGATGGCGTGGCGTACTACAACAAGATGGAGGAGCTCTACAAGACGCACTTGACTGCAGTGAATGAAGAGGTTAAGAAAGTCGAAGCTGATATTAAAAAAGAAGATGATAAGATTAAAAAGATAGAAAATGATACCACTAAAACTACTGAAAAGACCCAATCGATGGCCAAAAAGGCCGAGCTGGAGAAGTACCTCCCGTTCCTGAATAGCCTCCAAAAGGAGTACGAGTCC	PX841052	NCBI	https://www.ncbi.nlm.nih.gov/nuccore/PX841052
ET_168	Ethiopia	2021-07-18	Symptomatic	3	F	H03	0.0231214	12351	74.2126	1	100	GAGGAGAAGAAGAAGAAGCTTATAGGCAGCTACAAGTACATCGGTGCATCGATCGACATGGATCTGGCCACCGCGAATGATGGCGTGGCGTACTACAACAAGATGGAGGAGCTCTACAAGACGCACTTGACTGCAGTGAATGAAGAGGTTAAGAAAGTCGAAGCTGATATTAAAAAAGAAGATGATAAGATTAAAAAGATAGAAAATGATACCACTAAAACTACTGAAAAGACCCAATCGATGGCCAAAAAGGCCGAGCTGGAGAAGTACCTCCCGTTCCTGAATAGCCTCCAAAAGGAGTACGAGTCC	PX841052	NCBI	https://www.ncbi.nlm.nih.gov/nuccore/PX841052
ET_169	Ethiopia	2020-10-21	Symptomatic	0	M	H01	0.00892495	4018	70.9308	1	100	GAGGAGAAGAAGAAGAAGCTTATAGGCAGCTACAAGTACATCGGTGCATCGATCGACATGGATCTGGCCACCGCGAATGATGGCGTGGCGTACTACAACAAGATGGAGGAGCTCTACAAGACGCACTTGGATGGAGTGAAAACAGAGATTAAGAAAGTCGAAGATGATATTAAAAAACATGATGAGAAGCTTAAAAAGATAGAAAATGAAGCCAGTAAAACTAGTGAAAAGACCCAATTGAATGCCAAAAAGGCCGAGCTGGAGAAGTACCTCCCGTTCCTGAATAGCCTCCAAAAGGAGTACGAGTCC	PX841046	NCBI	https://www.ncbi.nlm.nih.gov/nuccore/PX841046
ET_169	Ethiopia	2020-12-06	Asymptomatic	1	M	H01	0.00892495	8064	72.1974	1	100	GAGGAGAAGAAGAAGAAGCTTATAGGCAGCTACAAGTACATCGGTGCATCGATCGACATGGATCTGGCCACCGCGAATGATGGCGTGGCGTACTACAACAAGATGGAGGAGCTCTACAAGACGCACTTGGATGGAGTGAAAACAGAGATTAAGAAAGTCGAAGATGATATTAAAAAACATGATGAGAAGCTTAAAAAGATAGAAAATGAAGCCAGTAAAACTAGTGAAAAGACCCAATTGAATGCCAAAAAGGCCGAGCTGGAGAAGTACCTCCCGTTCCTGAATAGCCTCCAAAAGGAGTACGAGTCC	PX841046	NCBI	https://www.ncbi.nlm.nih.gov/nuccore/PX841046
ET_169	Ethiopia	2020-12-22	Asymptomatic	2	M	H01	0.00892495	1972	63.4888	1	100	GAGGAGAAGAAGAAGAAGCTTATAGGCAGCTACAAGTACATCGGTGCATCGATCGACATGGATCTGGCCACCGCGAATGATGGCGTGGCGTACTACAACAAGATGGAGGAGCTCTACAAGACGCACTTGGATGGAGTGAAAACAGAGATTAAGAAAGTCGAAGATGATATTAAAAAACATGATGAGAAGCTTAAAAAGATAGAAAATGAAGCCAGTAAAACTAGTGAAAAGACCCAATTGAATGCCAAAAAGGCCGAGCTGGAGAAGTACCTCCCGTTCCTGAATAGCCTCCAAAAGGAGTACGAGTCC	PX841046	NCBI	https://www.ncbi.nlm.nih.gov/nuccore/PX841046
ET_169	Ethiopia	2021-01-20	Asymptomatic	3	M	H01	0.00892495	2602	60.761	2	60.761	GAGGAGAAGAAGAAGAAGCTTATAGGCAGCTACAAGTACATCGGTGCATCGATCGACATGGATCTGGCCACCGCGAATGATGGCGTGGCGTACTACAACAAGATGGAGGAGCTCTACAAGACGCACTTGGATGGAGTGAAAACAGAGATTAAGAAAGTCGAAGATGATATTAAAAAACATGATGAGAAGCTTAAAAAGATAGAAAATGAAGCCAGTAAAACTAGTGAAAAGACCCAATTGAATGCCAAAAAGGCCGAGCTGGAGAAGTACCTCCCGTTCCTGAATAGCCTCCAAAAGGAGTACGAGTCC	PX841046	NCBI	https://www.ncbi.nlm.nih.gov/nuccore/PX841046
ET_170	Ethiopia	2020-11-24	Symptomatic	0	M	H01	0.00892495	1100	100	1	100	GAGGAGAAGAAGAAGAAGCTTATAGGCAGCTACAAGTACATCGGTGCATCGATCGACATGGATCTGGCCACCGCGAATGATGGCGTGGCGTACTACAACAAGATGGAGGAGCTCTACAAGACGCACTTGGATGGAGTGAAAACAGAGATTAAGAAAGTCGAAGATGATATTAAAAAACATGATGAGAAGCTTAAAAAGATAGAAAATGAAGCCAGTAAAACTAGTGAAAAGACCCAATTGAATGCCAAAAAGGCCGAGCTGGAGAAGTACCTCCCGTTCCTGAATAGCCTCCAAAAGGAGTACGAGTCC	PX841046	NCBI	https://www.ncbi.nlm.nih.gov/nuccore/PX841046
ET_170	Ethiopia	2021-01-26	Asymptomatic	1	M	H01	0.00892495	8409	72.1727	1	100	GAGGAGAAGAAGAAGAAGCTTATAGGCAGCTACAAGTACATCGGTGCATCGATCGACATGGATCTGGCCACCGCGAATGATGGCGTGGCGTACTACAACAAGATGGAGGAGCTCTACAAGACGCACTTGGATGGAGTGAAAACAGAGATTAAGAAAGTCGAAGATGATATTAAAAAACATGATGAGAAGCTTAAAAAGATAGAAAATGAAGCCAGTAAAACTAGTGAAAAGACCCAATTGAATGCCAAAAAGGCCGAGCTGGAGAAGTACCTCCCGTTCCTGAATAGCCTCCAAAAGGAGTACGAGTCC	PX841046	NCBI	https://www.ncbi.nlm.nih.gov/nuccore/PX841046
ET_170	Ethiopia	2021-06-11	Asymptomatic	2	M	H01	0.00892495	12409	70.884	1	100	GAGGAGAAGAAGAAGAAGCTTATAGGCAGCTACAAGTACATCGGTGCATCGATCGACATGGATCTGGCCACCGCGAATGATGGCGTGGCGTACTACAACAAGATGGAGGAGCTCTACAAGACGCACTTGGATGGAGTGAAAACAGAGATTAAGAAAGTCGAAGATGATATTAAAAAACATGATGAGAAGCTTAAAAAGATAGAAAATGAAGCCAGTAAAACTAGTGAAAAGACCCAATTGAATGCCAAAAAGGCCGAGCTGGAGAAGTACCTCCCGTTCCTGAATAGCCTCCAAAAGGAGTACGAGTCC	PX841046	NCBI	https://www.ncbi.nlm.nih.gov/nuccore/PX841046
ET_170	Ethiopia	2021-08-20	Asymptomatic	3	M	H01	0.00892495	5033	65.905	1	100	GAGGAGAAGAAGAAGAAGCTTATAGGCAGCTACAAGTACATCGGTGCATCGATCGACATGGATCTGGCCACCGCGAATGATGGCGTGGCGTACTACAACAAGATGGAGGAGCTCTACAAGACGCACTTGGATGGAGTGAAAACAGAGATTAAGAAAGTCGAAGATGATATTAAAAAACATGATGAGAAGCTTAAAAAGATAGAAAATGAAGCCAGTAAAACTAGTGAAAAGACCCAATTGAATGCCAAAAAGGCCGAGCTGGAGAAGTACCTCCCGTTCCTGAATAGCCTCCAAAAGGAGTACGAGTCC	PX841046	NCBI	https://www.ncbi.nlm.nih.gov/nuccore/PX841046
ET_171	Ethiopia	2019-12-21	Symptomatic	0	F	H02	0.0275049	7395	79.3509	3	96.5923	GAGGAGAAGAAGAAGAAGCTTATAGGCAGCTACAAGTACATCGGTGCATCGATCGACAAGGATCTGGCCACCGCGAATGATGGCGTGGCGTACTACAACAAGATGGAGGAGCTCTACAAGACGCACTTGACTGCAGTGAATGCACAGATTAAGAAAGTCGAAGATGATATTAAAAAACAAAATGAGGAGCTTAAAAAGATAGAAAATGAAGCCAATAAAACTGCTGAAAAGGCTAAATTTACTGCCAAAAAGGCCGAGTTGGAGAAGTACCTCCCATTCCTGAATAGCCTCCAAAAGGAGTACGAGTCC	PX841048	NCBI	https://www.ncbi.nlm.nih.gov/nuccore/PX841048
ET_171	Ethiopia	2020-03-11	Symptomatic	1	F	H01	0.00892495	17481	65.7285	2	90.8644	GAGGAGAAGAAGAAGAAGCTTATAGGCAGCTACAAGTACATCGGTGCATCGATCGACATGGATCTGGCCACCGCGAATGATGGCGTGGCGTACTACAACAAGATGGAGGAGCTCTACAAGACGCACTTGGATGGAGTGAAAACAGAGATTAAGAAAGTCGAAGATGATATTAAAAAACATGATGAGAAGCTTAAAAAGATAGAAAATGAAGCCAGTAAAACTAGTGAAAAGACCCAATTGAATGCCAAAAAGGCCGAGCTGGAGAAGTACCTCCCGTTCCTGAATAGCCTCCAAAAGGAGTACGAGTCC	PX841046	NCBI	https://www.ncbi.nlm.nih.gov/nuccore/PX841046
ET_171	Ethiopia	2020-06-01	Symptomatic	2	F	H20	0.620025	2387	49.6858	2	62.0025	GAGGAGAAGAAGAAGAAGCTTATAGGCAGCTACAAGTACATCGGTGCATCGATCGACATGGATCTGGCCACCGCGAATGATGGCGTGGCCTACTACAACAAGATGGAGGAGCTCTACAAGACGCACTTGGATGGAGTGAAAACAGAGATTAAGAAAGTCGAAGATGATATTAAAAAACATGATGAGAAGCTTAAAAAGATAGAAAATGAAGCCAGTAAAACTAGTGAAAAGACCCAATTGAATGCCAAAAAGGCCGAGCTGGAGAAGTACCTCCCGTTCCTGAATAGCCTCCAAAAGGAGTACGAGTCC	PX841066	NCBI	https://www.ncbi.nlm.nih.gov/nuccore/PX841066
ET_171	Ethiopia	2020-11-30	Symptomatic	3	F	H01	0.00892495	10291	79.1468	2	97.9108	GAGGAGAAGAAGAAGAAGCTTATAGGCAGCTACAAGTACATCGGTGCATCGATCGACATGGATCTGGCCACCGCGAATGATGGCGTGGCGTACTACAACAAGATGGAGGAGCTCTACAAGACGCACTTGGATGGAGTGAAAACAGAGATTAAGAAAGTCGAAGATGATATTAAAAAACATGATGAGAAGCTTAAAAAGATAGAAAATGAAGCCAGTAAAACTAGTGAAAAGACCCAATTGAATGCCAAAAAGGCCGAGCTGGAGAAGTACCTCCCGTTCCTGAATAGCCTCCAAAAGGAGTACGAGTCC	PX841046	NCBI	https://www.ncbi.nlm.nih.gov/nuccore/PX841046
ET_172	Ethiopia	2020-06-03	Symptomatic	0	M	H01	0.00892495	6203	67.1449	1	100	GAGGAGAAGAAGAAGAAGCTTATAGGCAGCTACAAGTACATCGGTGCATCGATCGACATGGATCTGGCCACCGCGAATGATGGCGTGGCGTACTACAACAAGATGGAGGAGCTCTACAAGACGCACTTGGATGGAGTGAAAACAGAGATTAAGAAAGTCGAAGATGATATTAAAAAACATGATGAGAAGCTTAAAAAGATAGAAAATGAAGCCAGTAAAACTAGTGAAAAGACCCAATTGAATGCCAAAAAGGCCGAGCTGGAGAAGTACCTCCCGTTCCTGAATAGCCTCCAAAAGGAGTACGAGTCC	PX841046	NCBI	https://www.ncbi.nlm.nih.gov/nuccore/PX841046
ET_172	Ethiopia	2020-09-29	Symptomatic	1	M	H01	0.00892495	12189	67.8563	2	93.6582	GAGGAGAAGAAGAAGAAGCTTATAGGCAGCTACAAGTACATCGGTGCATCGATCGACATGGATCTGGCCACCGCGAATGATGGCGTGGCGTACTACAACAAGATGGAGGAGCTCTACAAGACGCACTTGGATGGAGTGAAAACAGAGATTAAGAAAGTCGAAGATGATATTAAAAAACATGATGAGAAGCTTAAAAAGATAGAAAATGAAGCCAGTAAAACTAGTGAAAAGACCCAATTGAATGCCAAAAAGGCCGAGCTGGAGAAGTACCTCCCGTTCCTGAATAGCCTCCAAAAGGAGTACGAGTCC	PX841046	NCBI	https://www.ncbi.nlm.nih.gov/nuccore/PX841046
ET_172	Ethiopia	2020-11-03	Symptomatic	2	M	H01	0.00892495	8500	84.4353	1	100	GAGGAGAAGAAGAAGAAGCTTATAGGCAGCTACAAGTACATCGGTGCATCGATCGACATGGATCTGGCCACCGCGAATGATGGCGTGGCGTACTACAACAAGATGGAGGAGCTCTACAAGACGCACTTGGATGGAGTGAAAACAGAGATTAAGAAAGTCGAAGATGATATTAAAAAACATGATGAGAAGCTTAAAAAGATAGAAAATGAAGCCAGTAAAACTAGTGAAAAGACCCAATTGAATGCCAAAAAGGCCGAGCTGGAGAAGTACCTCCCGTTCCTGAATAGCCTCCAAAAGGAGTACGAGTCC	PX841046	NCBI	https://www.ncbi.nlm.nih.gov/nuccore/PX841046
ET_172	Ethiopia	2020-12-18	Symptomatic	3	M	H01	0.00892495	10751	81.1273	1	100	GAGGAGAAGAAGAAGAAGCTTATAGGCAGCTACAAGTACATCGGTGCATCGATCGACATGGATCTGGCCACCGCGAATGATGGCGTGGCGTACTACAACAAGATGGAGGAGCTCTACAAGACGCACTTGGATGGAGTGAAAACAGAGATTAAGAAAGTCGAAGATGATATTAAAAAACATGATGAGAAGCTTAAAAAGATAGAAAATGAAGCCAGTAAAACTAGTGAAAAGACCCAATTGAATGCCAAAAAGGCCGAGCTGGAGAAGTACCTCCCGTTCCTGAATAGCCTCCAAAAGGAGTACGAGTCC	PX841046	NCBI	https://www.ncbi.nlm.nih.gov/nuccore/PX841046
ET_172	Ethiopia	2021-02-04	Symptomatic	4	M	H01	0.00892495	15714	67.4621	1	100	GAGGAGAAGAAGAAGAAGCTTATAGGCAGCTACAAGTACATCGGTGCATCGATCGACATGGATCTGGCCACCGCGAATGATGGCGTGGCGTACTACAACAAGATGGAGGAGCTCTACAAGACGCACTTGGATGGAGTGAAAACAGAGATTAAGAAAGTCGAAGATGATATTAAAAAACATGATGAGAAGCTTAAAAAGATAGAAAATGAAGCCAGTAAAACTAGTGAAAAGACCCAATTGAATGCCAAAAAGGCCGAGCTGGAGAAGTACCTCCCGTTCCTGAATAGCCTCCAAAAGGAGTACGAGTCC	PX841046	NCBI	https://www.ncbi.nlm.nih.gov/nuccore/PX841046
ET_173	Ethiopia	2020-11-27	Symptomatic	0	M	H07	0.0637647	4066	37.998	3	54.4024	GAGGAGAAGAAGAAGAAGCTTCTAGGCAGCTACAAGTACATCGGTGCATCGATCGACAAGGATCTGGCCACCGCGAATGATGGCGTGGCGTACTACAACAAGATGGAGGAGCTCTACAAGACGCACTTGACTGCAGTGAATGCACAGATTAAGAAAGTCGAAGATGATATTAAAAAGCAAGATGAGGAGCTTAAAAAGATAGAAAATGAAGCCAATAAAACTGCTGAAAAGGCTAAATTTACTGCCAAAAAGGCCGAGTTGGAGAAGTACCTCCCATTCCTGAATAGCCTCCAAAAGGAGTACGAGTCC	PX841049	NCBI	https://www.ncbi.nlm.nih.gov/nuccore/PX841049
ET_173	Ethiopia	2021-02-17	Asymptomatic	1	M	H03	0.0231214	2658	73.8149	1	100	GAGGAGAAGAAGAAGAAGCTTATAGGCAGCTACAAGTACATCGGTGCATCGATCGACATGGATCTGGCCACCGCGAATGATGGCGTGGCGTACTACAACAAGATGGAGGAGCTCTACAAGACGCACTTGACTGCAGTGAATGAAGAGGTTAAGAAAGTCGAAGCTGATATTAAAAAAGAAGATGATAAGATTAAAAAGATAGAAAATGATACCACTAAAACTACTGAAAAGACCCAATCGATGGCCAAAAAGGCCGAGCTGGAGAAGTACCTCCCGTTCCTGAATAGCCTCCAAAAGGAGTACGAGTCC	PX841052	NCBI	https://www.ncbi.nlm.nih.gov/nuccore/PX841052
ET_173	Ethiopia	2021-04-16	Asymptomatic	2	M	H19	1	6660	67.7027	1	100	GAGGAGAAGAAGAAGAAGCTTATAGGCAGCTACAAGTACATCGGTGCATCGATCGACATGGATCTGGCCACCGCGAATGATGGCGTGGCGTACTACAACAAGGTGGAGGAGCTCTACAAGACGCACTTGGATGGAGTGAAGACAGAGATTAAGAAAGTCGAAGATGATATTAAAAAACATGATGAGAAGCTTAAAAAGATAGAAAATGAAGCCAGTAAAACTAGTGAAAAGACCCAATTGAATGCCAAAAAGGCCGAGCTGGAGAAGTACCTCCCGTTCCTGAATAGCCTCCAAAAGGAGTACGAGTCC	PX841067	NCBI	https://www.ncbi.nlm.nih.gov/nuccore/PX841067
ET_173	Ethiopia	2021-10-20	Asymptomatic	3	M	H07	0.0637647	2406	61.9701	1	100	GAGGAGAAGAAGAAGAAGCTTCTAGGCAGCTACAAGTACATCGGTGCATCGATCGACAAGGATCTGGCCACCGCGAATGATGGCGTGGCGTACTACAACAAGATGGAGGAGCTCTACAAGACGCACTTGACTGCAGTGAATGCACAGATTAAGAAAGTCGAAGATGATATTAAAAAGCAAGATGAGGAGCTTAAAAAGATAGAAAATGAAGCCAATAAAACTGCTGAAAAGGCTAAATTTACTGCCAAAAAGGCCGAGTTGGAGAAGTACCTCCCATTCCTGAATAGCCTCCAAAAGGAGTACGAGTCC	PX841049	NCBI	https://www.ncbi.nlm.nih.gov/nuccore/PX841049
ET_174	Ethiopia	2020-11-07	Symptomatic	0	M	H02	0.0275049	6993	62.963	1	100	GAGGAGAAGAAGAAGAAGCTTATAGGCAGCTACAAGTACATCGGTGCATCGATCGACAAGGATCTGGCCACCGCGAATGATGGCGTGGCGTACTACAACAAGATGGAGGAGCTCTACAAGACGCACTTGACTGCAGTGAATGCACAGATTAAGAAAGTCGAAGATGATATTAAAAAACAAAATGAGGAGCTTAAAAAGATAGAAAATGAAGCCAATAAAACTGCTGAAAAGGCTAAATTTACTGCCAAAAAGGCCGAGTTGGAGAAGTACCTCCCATTCCTGAATAGCCTCCAAAAGGAGTACGAGTCC	PX841048	NCBI	https://www.ncbi.nlm.nih.gov/nuccore/PX841048
ET_174	Ethiopia	2020-12-21	Asymptomatic	1	M	H02	0.0275049	13200	69.3106	3	88	GAGGAGAAGAAGAAGAAGCTTATAGGCAGCTACAAGTACATCGGTGCATCGATCGACAAGGATCTGGCCACCGCGAATGATGGCGTGGCGTACTACAACAAGATGGAGGAGCTCTACAAGACGCACTTGACTGCAGTGAATGCACAGATTAAGAAAGTCGAAGATGATATTAAAAAACAAAATGAGGAGCTTAAAAAGATAGAAAATGAAGCCAATAAAACTGCTGAAAAGGCTAAATTTACTGCCAAAAAGGCCGAGTTGGAGAAGTACCTCCCATTCCTGAATAGCCTCCAAAAGGAGTACGAGTCC	PX841048	NCBI	https://www.ncbi.nlm.nih.gov/nuccore/PX841048
ET_174	Ethiopia	2021-01-15	Asymptomatic	2	M	H01	0.00892495	5402	71.8067	1	100	GAGGAGAAGAAGAAGAAGCTTATAGGCAGCTACAAGTACATCGGTGCATCGATCGACATGGATCTGGCCACCGCGAATGATGGCGTGGCGTACTACAACAAGATGGAGGAGCTCTACAAGACGCACTTGGATGGAGTGAAAACAGAGATTAAGAAAGTCGAAGATGATATTAAAAAACATGATGAGAAGCTTAAAAAGATAGAAAATGAAGCCAGTAAAACTAGTGAAAAGACCCAATTGAATGCCAAAAAGGCCGAGCTGGAGAAGTACCTCCCGTTCCTGAATAGCCTCCAAAAGGAGTACGAGTCC	PX841046	NCBI	https://www.ncbi.nlm.nih.gov/nuccore/PX841046
ET_174	Ethiopia	2021-02-08	Asymptomatic	3	M	H02	0.0275049	1388	69.5965	1	100	GAGGAGAAGAAGAAGAAGCTTATAGGCAGCTACAAGTACATCGGTGCATCGATCGACAAGGATCTGGCCACCGCGAATGATGGCGTGGCGTACTACAACAAGATGGAGGAGCTCTACAAGACGCACTTGACTGCAGTGAATGCACAGATTAAGAAAGTCGAAGATGATATTAAAAAACAAAATGAGGAGCTTAAAAAGATAGAAAATGAAGCCAATAAAACTGCTGAAAAGGCTAAATTTACTGCCAAAAAGGCCGAGTTGGAGAAGTACCTCCCATTCCTGAATAGCCTCCAAAAGGAGTACGAGTCC	PX841048	NCBI	https://www.ncbi.nlm.nih.gov/nuccore/PX841048
ET_174	Ethiopia	2021-03-05	Asymptomatic	4	M	H02	0.0275049	8799	62.6662	2	92.4651	GAGGAGAAGAAGAAGAAGCTTATAGGCAGCTACAAGTACATCGGTGCATCGATCGACAAGGATCTGGCCACCGCGAATGATGGCGTGGCGTACTACAACAAGATGGAGGAGCTCTACAAGACGCACTTGACTGCAGTGAATGCACAGATTAAGAAAGTCGAAGATGATATTAAAAAACAAAATGAGGAGCTTAAAAAGATAGAAAATGAAGCCAATAAAACTGCTGAAAAGGCTAAATTTACTGCCAAAAAGGCCGAGTTGGAGAAGTACCTCCCATTCCTGAATAGCCTCCAAAAGGAGTACGAGTCC	PX841048	NCBI	https://www.ncbi.nlm.nih.gov/nuccore/PX841048
ET_174	Ethiopia	2021-07-30	Asymptomatic	5	M	H02	0.0275049	10925	77.5927	3	94.2883	GAGGAGAAGAAGAAGAAGCTTATAGGCAGCTACAAGTACATCGGTGCATCGATCGACAAGGATCTGGCCACCGCGAATGATGGCGTGGCGTACTACAACAAGATGGAGGAGCTCTACAAGACGCACTTGACTGCAGTGAATGCACAGATTAAGAAAGTCGAAGATGATATTAAAAAACAAAATGAGGAGCTTAAAAAGATAGAAAATGAAGCCAATAAAACTGCTGAAAAGGCTAAATTTACTGCCAAAAAGGCCGAGTTGGAGAAGTACCTCCCATTCCTGAATAGCCTCCAAAAGGAGTACGAGTCC	PX841048	NCBI	https://www.ncbi.nlm.nih.gov/nuccore/PX841048
ET_175	Ethiopia	2020-10-02	Symptomatic	0	M	H02	0.0275049	2545	72.7701	1	100	GAGGAGAAGAAGAAGAAGCTTATAGGCAGCTACAAGTACATCGGTGCATCGATCGACAAGGATCTGGCCACCGCGAATGATGGCGTGGCGTACTACAACAAGATGGAGGAGCTCTACAAGACGCACTTGACTGCAGTGAATGCACAGATTAAGAAAGTCGAAGATGATATTAAAAAACAAAATGAGGAGCTTAAAAAGATAGAAAATGAAGCCAATAAAACTGCTGAAAAGGCTAAATTTACTGCCAAAAAGGCCGAGTTGGAGAAGTACCTCCCATTCCTGAATAGCCTCCAAAAGGAGTACGAGTCC	PX841048	NCBI	https://www.ncbi.nlm.nih.gov/nuccore/PX841048
ET_175	Ethiopia	2021-06-25	Asymptomatic	1	M	H02	0.0275049	16125	53.4264	2	87.4543	GAGGAGAAGAAGAAGAAGCTTATAGGCAGCTACAAGTACATCGGTGCATCGATCGACAAGGATCTGGCCACCGCGAATGATGGCGTGGCGTACTACAACAAGATGGAGGAGCTCTACAAGACGCACTTGACTGCAGTGAATGCACAGATTAAGAAAGTCGAAGATGATATTAAAAAACAAAATGAGGAGCTTAAAAAGATAGAAAATGAAGCCAATAAAACTGCTGAAAAGGCTAAATTTACTGCCAAAAAGGCCGAGTTGGAGAAGTACCTCCCATTCCTGAATAGCCTCCAAAAGGAGTACGAGTCC	PX841048	NCBI	https://www.ncbi.nlm.nih.gov/nuccore/PX841048
ET_176	Ethiopia	2019-11-02	Symptomatic	0	F	H09	0.894651	756	68.9153	1	100	GAGGAGAAGAAGAAGAAGCTTATAGGCAGCTACAAGTACATCGGTGCATCGATCGACAAGGATCTGGCCACCGCGAATGATGGCGTGGCGTACTACAACAAGATGGAGGAGCTCTACAAGACGCACTTGACTGCAGTGAATGCACAGATTAAGAAAGTCGAAGATGATATTAAAAAACAAAATGAGGAGCTTAAAAAGATAGAAAATGAAGCCAATAAAACTGCTGAAAAGGCTAAATTTACTGCCAAAAAGGCCGAGCTGGAGAAGTACCTCCCGTTCCTGAATAGCCTCCAAAAGGAGTACGAGTCC	PX841053	NCBI	https://www.ncbi.nlm.nih.gov/nuccore/PX841053
ET_176	Ethiopia	2020-01-22	Symptomatic	1	F	H09	0.894651	9971	73.8341	2	97.1718	GAGGAGAAGAAGAAGAAGCTTATAGGCAGCTACAAGTACATCGGTGCATCGATCGACAAGGATCTGGCCACCGCGAATGATGGCGTGGCGTACTACAACAAGATGGAGGAGCTCTACAAGACGCACTTGACTGCAGTGAATGCACAGATTAAGAAAGTCGAAGATGATATTAAAAAACAAAATGAGGAGCTTAAAAAGATAGAAAATGAAGCCAATAAAACTGCTGAAAAGGCTAAATTTACTGCCAAAAAGGCCGAGCTGGAGAAGTACCTCCCGTTCCTGAATAGCCTCCAAAAGGAGTACGAGTCC	PX841053	NCBI	https://www.ncbi.nlm.nih.gov/nuccore/PX841053
ET_177	Ethiopia	2020-10-28	Symptomatic	0	M	H01	0.00892495	4899	54.5622	2	79.9143	GAGGAGAAGAAGAAGAAGCTTATAGGCAGCTACAAGTACATCGGTGCATCGATCGACATGGATCTGGCCACCGCGAATGATGGCGTGGCGTACTACAACAAGATGGAGGAGCTCTACAAGACGCACTTGGATGGAGTGAAAACAGAGATTAAGAAAGTCGAAGATGATATTAAAAAACATGATGAGAAGCTTAAAAAGATAGAAAATGAAGCCAGTAAAACTAGTGAAAAGACCCAATTGAATGCCAAAAAGGCCGAGCTGGAGAAGTACCTCCCGTTCCTGAATAGCCTCCAAAAGGAGTACGAGTCC	PX841046	NCBI	https://www.ncbi.nlm.nih.gov/nuccore/PX841046
ET_177	Ethiopia	2021-07-21	Symptomatic	1	M	H01	0.00892495	2424	71.5759	1	100	GAGGAGAAGAAGAAGAAGCTTATAGGCAGCTACAAGTACATCGGTGCATCGATCGACATGGATCTGGCCACCGCGAATGATGGCGTGGCGTACTACAACAAGATGGAGGAGCTCTACAAGACGCACTTGGATGGAGTGAAAACAGAGATTAAGAAAGTCGAAGATGATATTAAAAAACATGATGAGAAGCTTAAAAAGATAGAAAATGAAGCCAGTAAAACTAGTGAAAAGACCCAATTGAATGCCAAAAAGGCCGAGCTGGAGAAGTACCTCCCGTTCCTGAATAGCCTCCAAAAGGAGTACGAGTCC	PX841046	NCBI	https://www.ncbi.nlm.nih.gov/nuccore/PX841046
ET_178	Ethiopia	2021-02-26	Symptomatic	0	F	H02	0.0275049	4372	75.5947	1	100	GAGGAGAAGAAGAAGAAGCTTATAGGCAGCTACAAGTACATCGGTGCATCGATCGACAAGGATCTGGCCACCGCGAATGATGGCGTGGCGTACTACAACAAGATGGAGGAGCTCTACAAGACGCACTTGACTGCAGTGAATGCACAGATTAAGAAAGTCGAAGATGATATTAAAAAACAAAATGAGGAGCTTAAAAAGATAGAAAATGAAGCCAATAAAACTGCTGAAAAGGCTAAATTTACTGCCAAAAAGGCCGAGTTGGAGAAGTACCTCCCATTCCTGAATAGCCTCCAAAAGGAGTACGAGTCC	PX841048	NCBI	https://www.ncbi.nlm.nih.gov/nuccore/PX841048
ET_178	Ethiopia	2021-04-17	Asymptomatic	1	F	H02	0.0275049	8685	87.9217	1	100	GAGGAGAAGAAGAAGAAGCTTATAGGCAGCTACAAGTACATCGGTGCATCGATCGACAAGGATCTGGCCACCGCGAATGATGGCGTGGCGTACTACAACAAGATGGAGGAGCTCTACAAGACGCACTTGACTGCAGTGAATGCACAGATTAAGAAAGTCGAAGATGATATTAAAAAACAAAATGAGGAGCTTAAAAAGATAGAAAATGAAGCCAATAAAACTGCTGAAAAGGCTAAATTTACTGCCAAAAAGGCCGAGTTGGAGAAGTACCTCCCATTCCTGAATAGCCTCCAAAAGGAGTACGAGTCC	PX841048	NCBI	https://www.ncbi.nlm.nih.gov/nuccore/PX841048
ET_179	Ethiopia	2020-09-18	Symptomatic	0	M	H02	0.0275049	3669	75.0886	1	100	GAGGAGAAGAAGAAGAAGCTTATAGGCAGCTACAAGTACATCGGTGCATCGATCGACAAGGATCTGGCCACCGCGAATGATGGCGTGGCGTACTACAACAAGATGGAGGAGCTCTACAAGACGCACTTGACTGCAGTGAATGCACAGATTAAGAAAGTCGAAGATGATATTAAAAAACAAAATGAGGAGCTTAAAAAGATAGAAAATGAAGCCAATAAAACTGCTGAAAAGGCTAAATTTACTGCCAAAAAGGCCGAGTTGGAGAAGTACCTCCCATTCCTGAATAGCCTCCAAAAGGAGTACGAGTCC	PX841048	NCBI	https://www.ncbi.nlm.nih.gov/nuccore/PX841048
ET_179	Ethiopia	2020-11-19	Symptomatic	1	M	H02	0.0275049	11027	73.057	2	92.8358	GAGGAGAAGAAGAAGAAGCTTATAGGCAGCTACAAGTACATCGGTGCATCGATCGACAAGGATCTGGCCACCGCGAATGATGGCGTGGCGTACTACAACAAGATGGAGGAGCTCTACAAGACGCACTTGACTGCAGTGAATGCACAGATTAAGAAAGTCGAAGATGATATTAAAAAACAAAATGAGGAGCTTAAAAAGATAGAAAATGAAGCCAATAAAACTGCTGAAAAGGCTAAATTTACTGCCAAAAAGGCCGAGTTGGAGAAGTACCTCCCATTCCTGAATAGCCTCCAAAAGGAGTACGAGTCC	PX841048	NCBI	https://www.ncbi.nlm.nih.gov/nuccore/PX841048
ET_180	Ethiopia	2020-10-20	Symptomatic	0	M	H02	0.0275049	3229	70.5791	1	100	GAGGAGAAGAAGAAGAAGCTTATAGGCAGCTACAAGTACATCGGTGCATCGATCGACAAGGATCTGGCCACCGCGAATGATGGCGTGGCGTACTACAACAAGATGGAGGAGCTCTACAAGACGCACTTGACTGCAGTGAATGCACAGATTAAGAAAGTCGAAGATGATATTAAAAAACAAAATGAGGAGCTTAAAAAGATAGAAAATGAAGCCAATAAAACTGCTGAAAAGGCTAAATTTACTGCCAAAAAGGCCGAGTTGGAGAAGTACCTCCCATTCCTGAATAGCCTCCAAAAGGAGTACGAGTCC	PX841048	NCBI	https://www.ncbi.nlm.nih.gov/nuccore/PX841048
ET_180	Ethiopia	2020-12-03	Symptomatic	1	M	H02	0.0275049	10081	63.575	2	95.7048	GAGGAGAAGAAGAAGAAGCTTATAGGCAGCTACAAGTACATCGGTGCATCGATCGACAAGGATCTGGCCACCGCGAATGATGGCGTGGCGTACTACAACAAGATGGAGGAGCTCTACAAGACGCACTTGACTGCAGTGAATGCACAGATTAAGAAAGTCGAAGATGATATTAAAAAACAAAATGAGGAGCTTAAAAAGATAGAAAATGAAGCCAATAAAACTGCTGAAAAGGCTAAATTTACTGCCAAAAAGGCCGAGTTGGAGAAGTACCTCCCATTCCTGAATAGCCTCCAAAAGGAGTACGAGTCC	PX841048	NCBI	https://www.ncbi.nlm.nih.gov/nuccore/PX841048
ET_181	Ethiopia	2020-11-25	Symptomatic	0	F	H01	0.00892495	14961	74.5071	1	100	GAGGAGAAGAAGAAGAAGCTTATAGGCAGCTACAAGTACATCGGTGCATCGATCGACATGGATCTGGCCACCGCGAATGATGGCGTGGCGTACTACAACAAGATGGAGGAGCTCTACAAGACGCACTTGGATGGAGTGAAAACAGAGATTAAGAAAGTCGAAGATGATATTAAAAAACATGATGAGAAGCTTAAAAAGATAGAAAATGAAGCCAGTAAAACTAGTGAAAAGACCCAATTGAATGCCAAAAAGGCCGAGCTGGAGAAGTACCTCCCGTTCCTGAATAGCCTCCAAAAGGAGTACGAGTCC	PX841046	NCBI	https://www.ncbi.nlm.nih.gov/nuccore/PX841046
ET_181	Ethiopia	2021-01-20	Asymptomatic	1	F	H01	0.00892495	9357	75.334	2	98.3007	GAGGAGAAGAAGAAGAAGCTTATAGGCAGCTACAAGTACATCGGTGCATCGATCGACATGGATCTGGCCACCGCGAATGATGGCGTGGCGTACTACAACAAGATGGAGGAGCTCTACAAGACGCACTTGGATGGAGTGAAAACAGAGATTAAGAAAGTCGAAGATGATATTAAAAAACATGATGAGAAGCTTAAAAAGATAGAAAATGAAGCCAGTAAAACTAGTGAAAAGACCCAATTGAATGCCAAAAAGGCCGAGCTGGAGAAGTACCTCCCGTTCCTGAATAGCCTCCAAAAGGAGTACGAGTCC	PX841046	NCBI	https://www.ncbi.nlm.nih.gov/nuccore/PX841046
ET_182	Ethiopia	2020-11-10	Symptomatic	0	M	H02	0.0275049	7854	79.2208	1	100	GAGGAGAAGAAGAAGAAGCTTATAGGCAGCTACAAGTACATCGGTGCATCGATCGACAAGGATCTGGCCACCGCGAATGATGGCGTGGCGTACTACAACAAGATGGAGGAGCTCTACAAGACGCACTTGACTGCAGTGAATGCACAGATTAAGAAAGTCGAAGATGATATTAAAAAACAAAATGAGGAGCTTAAAAAGATAGAAAATGAAGCCAATAAAACTGCTGAAAAGGCTAAATTTACTGCCAAAAAGGCCGAGTTGGAGAAGTACCTCCCATTCCTGAATAGCCTCCAAAAGGAGTACGAGTCC	PX841048	NCBI	https://www.ncbi.nlm.nih.gov/nuccore/PX841048
ET_182	Ethiopia	2020-12-18	Asymptomatic	1	M	H01	0.00892495	5389	74.5593	1	100	GAGGAGAAGAAGAAGAAGCTTATAGGCAGCTACAAGTACATCGGTGCATCGATCGACATGGATCTGGCCACCGCGAATGATGGCGTGGCGTACTACAACAAGATGGAGGAGCTCTACAAGACGCACTTGGATGGAGTGAAAACAGAGATTAAGAAAGTCGAAGATGATATTAAAAAACATGATGAGAAGCTTAAAAAGATAGAAAATGAAGCCAGTAAAACTAGTGAAAAGACCCAATTGAATGCCAAAAAGGCCGAGCTGGAGAAGTACCTCCCGTTCCTGAATAGCCTCCAAAAGGAGTACGAGTCC	PX841046	NCBI	https://www.ncbi.nlm.nih.gov/nuccore/PX841046
ET_183	Ethiopia	2020-12-24	Symptomatic	0	M	H02	0.0275049	7720	32.0337	3	52.6425	GAGGAGAAGAAGAAGAAGCTTATAGGCAGCTACAAGTACATCGGTGCATCGATCGACAAGGATCTGGCCACCGCGAATGATGGCGTGGCGTACTACAACAAGATGGAGGAGCTCTACAAGACGCACTTGACTGCAGTGAATGCACAGATTAAGAAAGTCGAAGATGATATTAAAAAACAAAATGAGGAGCTTAAAAAGATAGAAAATGAAGCCAATAAAACTGCTGAAAAGGCTAAATTTACTGCCAAAAAGGCCGAGTTGGAGAAGTACCTCCCATTCCTGAATAGCCTCCAAAAGGAGTACGAGTCC	PX841048	NCBI	https://www.ncbi.nlm.nih.gov/nuccore/PX841048
ET_183	Ethiopia	2021-02-02	Asymptomatic	1	M	H02	0.0275049	5031	61.936	1	100	GAGGAGAAGAAGAAGAAGCTTATAGGCAGCTACAAGTACATCGGTGCATCGATCGACAAGGATCTGGCCACCGCGAATGATGGCGTGGCGTACTACAACAAGATGGAGGAGCTCTACAAGACGCACTTGACTGCAGTGAATGCACAGATTAAGAAAGTCGAAGATGATATTAAAAAACAAAATGAGGAGCTTAAAAAGATAGAAAATGAAGCCAATAAAACTGCTGAAAAGGCTAAATTTACTGCCAAAAAGGCCGAGTTGGAGAAGTACCTCCCATTCCTGAATAGCCTCCAAAAGGAGTACGAGTCC	PX841048	NCBI	https://www.ncbi.nlm.nih.gov/nuccore/PX841048
ET_184	Ethiopia	2021-06-17	Symptomatic	0	M	H01	0.00892495	9531	73.4865	2	96.8734	GAGGAGAAGAAGAAGAAGCTTATAGGCAGCTACAAGTACATCGGTGCATCGATCGACATGGATCTGGCCACCGCGAATGATGGCGTGGCGTACTACAACAAGATGGAGGAGCTCTACAAGACGCACTTGGATGGAGTGAAAACAGAGATTAAGAAAGTCGAAGATGATATTAAAAAACATGATGAGAAGCTTAAAAAGATAGAAAATGAAGCCAGTAAAACTAGTGAAAAGACCCAATTGAATGCCAAAAAGGCCGAGCTGGAGAAGTACCTCCCGTTCCTGAATAGCCTCCAAAAGGAGTACGAGTCC	PX841046	NCBI	https://www.ncbi.nlm.nih.gov/nuccore/PX841046
ET_184	Ethiopia	2021-09-06	Asymptomatic	1	M	H01	0.00892495	12262	75.0041	1	100	GAGGAGAAGAAGAAGAAGCTTATAGGCAGCTACAAGTACATCGGTGCATCGATCGACATGGATCTGGCCACCGCGAATGATGGCGTGGCGTACTACAACAAGATGGAGGAGCTCTACAAGACGCACTTGGATGGAGTGAAAACAGAGATTAAGAAAGTCGAAGATGATATTAAAAAACATGATGAGAAGCTTAAAAAGATAGAAAATGAAGCCAGTAAAACTAGTGAAAAGACCCAATTGAATGCCAAAAAGGCCGAGCTGGAGAAGTACCTCCCGTTCCTGAATAGCCTCCAAAAGGAGTACGAGTCC	PX841046	NCBI	https://www.ncbi.nlm.nih.gov/nuccore/PX841046
ET_185	Ethiopia	2020-12-04	Symptomatic	0	F	H42	0.553716	5920	34.3074	2	55.3716	GAGGAGAAGAAGAAGAAGCTTATAGGCAGCTACAAGTACATCGGTGCATCGATCGACATGGATCTGGCCACCGCGAATGATGGCGTGGCGTACTACAACAAGATGGAGGAGCTCTACAAGACGCACTTGGATGGAGTGAAAACAGAGATTAAGAGAGTCGAAGATGATATTAAAAAACATGATGAGAAGCTTAAAAAGATAGAAAATGAAGCCAGTAAAACTAGTGAAAAGACCCAATTGAATGCCAAAAAGGCCGAGCTGGAGAAGTACCTCCCGTTCCTGAATAGCCTCCAAAAGGAGTACGAGTCC	PX841061	NCBI	https://www.ncbi.nlm.nih.gov/nuccore/PX841061
ET_185	Ethiopia	2021-02-19	Asymptomatic	1	F	H01	0.00892495	3339	68.4337	1	100	GAGGAGAAGAAGAAGAAGCTTATAGGCAGCTACAAGTACATCGGTGCATCGATCGACATGGATCTGGCCACCGCGAATGATGGCGTGGCGTACTACAACAAGATGGAGGAGCTCTACAAGACGCACTTGGATGGAGTGAAAACAGAGATTAAGAAAGTCGAAGATGATATTAAAAAACATGATGAGAAGCTTAAAAAGATAGAAAATGAAGCCAGTAAAACTAGTGAAAAGACCCAATTGAATGCCAAAAAGGCCGAGCTGGAGAAGTACCTCCCGTTCCTGAATAGCCTCCAAAAGGAGTACGAGTCC	PX841046	NCBI	https://www.ncbi.nlm.nih.gov/nuccore/PX841046
ET_186	Ethiopia	2020-11-28	Symptomatic	0	F	H02	0.0275049	2904	77.7204	1	100	GAGGAGAAGAAGAAGAAGCTTATAGGCAGCTACAAGTACATCGGTGCATCGATCGACAAGGATCTGGCCACCGCGAATGATGGCGTGGCGTACTACAACAAGATGGAGGAGCTCTACAAGACGCACTTGACTGCAGTGAATGCACAGATTAAGAAAGTCGAAGATGATATTAAAAAACAAAATGAGGAGCTTAAAAAGATAGAAAATGAAGCCAATAAAACTGCTGAAAAGGCTAAATTTACTGCCAAAAAGGCCGAGTTGGAGAAGTACCTCCCATTCCTGAATAGCCTCCAAAAGGAGTACGAGTCC	PX841048	NCBI	https://www.ncbi.nlm.nih.gov/nuccore/PX841048
ET_186	Ethiopia	2021-01-02	Asymptomatic	1	F	H02	0.0275049	4740	65.7173	2	82.6793	GAGGAGAAGAAGAAGAAGCTTATAGGCAGCTACAAGTACATCGGTGCATCGATCGACAAGGATCTGGCCACCGCGAATGATGGCGTGGCGTACTACAACAAGATGGAGGAGCTCTACAAGACGCACTTGACTGCAGTGAATGCACAGATTAAGAAAGTCGAAGATGATATTAAAAAACAAAATGAGGAGCTTAAAAAGATAGAAAATGAAGCCAATAAAACTGCTGAAAAGGCTAAATTTACTGCCAAAAAGGCCGAGTTGGAGAAGTACCTCCCATTCCTGAATAGCCTCCAAAAGGAGTACGAGTCC	PX841048	NCBI	https://www.ncbi.nlm.nih.gov/nuccore/PX841048
ET_187	Ethiopia	2020-10-19	Symptomatic	0	F	H02	0.0275049	8403	74.4139	1	100	GAGGAGAAGAAGAAGAAGCTTATAGGCAGCTACAAGTACATCGGTGCATCGATCGACAAGGATCTGGCCACCGCGAATGATGGCGTGGCGTACTACAACAAGATGGAGGAGCTCTACAAGACGCACTTGACTGCAGTGAATGCACAGATTAAGAAAGTCGAAGATGATATTAAAAAACAAAATGAGGAGCTTAAAAAGATAGAAAATGAAGCCAATAAAACTGCTGAAAAGGCTAAATTTACTGCCAAAAAGGCCGAGTTGGAGAAGTACCTCCCATTCCTGAATAGCCTCCAAAAGGAGTACGAGTCC	PX841048	NCBI	https://www.ncbi.nlm.nih.gov/nuccore/PX841048
ET_187	Ethiopia	2020-12-06	Asymptomatic	1	F	H02	0.0275049	9583	61.4317	1	100	GAGGAGAAGAAGAAGAAGCTTATAGGCAGCTACAAGTACATCGGTGCATCGATCGACAAGGATCTGGCCACCGCGAATGATGGCGTGGCGTACTACAACAAGATGGAGGAGCTCTACAAGACGCACTTGACTGCAGTGAATGCACAGATTAAGAAAGTCGAAGATGATATTAAAAAACAAAATGAGGAGCTTAAAAAGATAGAAAATGAAGCCAATAAAACTGCTGAAAAGGCTAAATTTACTGCCAAAAAGGCCGAGTTGGAGAAGTACCTCCCATTCCTGAATAGCCTCCAAAAGGAGTACGAGTCC	PX841048	NCBI	https://www.ncbi.nlm.nih.gov/nuccore/PX841048
ET_188	Ethiopia	2020-12-18	Symptomatic	0	M	H02	0.0275049	28955	74.9819	2	97.2302	GAGGAGAAGAAGAAGAAGCTTATAGGCAGCTACAAGTACATCGGTGCATCGATCGACAAGGATCTGGCCACCGCGAATGATGGCGTGGCGTACTACAACAAGATGGAGGAGCTCTACAAGACGCACTTGACTGCAGTGAATGCACAGATTAAGAAAGTCGAAGATGATATTAAAAAACAAAATGAGGAGCTTAAAAAGATAGAAAATGAAGCCAATAAAACTGCTGAAAAGGCTAAATTTACTGCCAAAAAGGCCGAGTTGGAGAAGTACCTCCCATTCCTGAATAGCCTCCAAAAGGAGTACGAGTCC	PX841048	NCBI	https://www.ncbi.nlm.nih.gov/nuccore/PX841048
ET_188	Ethiopia	2021-02-03	Asymptomatic	1	M	H02	0.0275049	10071	76.2884	2	95.5119	GAGGAGAAGAAGAAGAAGCTTATAGGCAGCTACAAGTACATCGGTGCATCGATCGACAAGGATCTGGCCACCGCGAATGATGGCGTGGCGTACTACAACAAGATGGAGGAGCTCTACAAGACGCACTTGACTGCAGTGAATGCACAGATTAAGAAAGTCGAAGATGATATTAAAAAACAAAATGAGGAGCTTAAAAAGATAGAAAATGAAGCCAATAAAACTGCTGAAAAGGCTAAATTTACTGCCAAAAAGGCCGAGTTGGAGAAGTACCTCCCATTCCTGAATAGCCTCCAAAAGGAGTACGAGTCC	PX841048	NCBI	https://www.ncbi.nlm.nih.gov/nuccore/PX841048
ET_189	Ethiopia	2021-02-06	Symptomatic	0	M	H02	0.0275049	1259	100	1	100	GAGGAGAAGAAGAAGAAGCTTATAGGCAGCTACAAGTACATCGGTGCATCGATCGACAAGGATCTGGCCACCGCGAATGATGGCGTGGCGTACTACAACAAGATGGAGGAGCTCTACAAGACGCACTTGACTGCAGTGAATGCACAGATTAAGAAAGTCGAAGATGATATTAAAAAACAAAATGAGGAGCTTAAAAAGATAGAAAATGAAGCCAATAAAACTGCTGAAAAGGCTAAATTTACTGCCAAAAAGGCCGAGTTGGAGAAGTACCTCCCATTCCTGAATAGCCTCCAAAAGGAGTACGAGTCC	PX841048	NCBI	https://www.ncbi.nlm.nih.gov/nuccore/PX841048
ET_189	Ethiopia	2021-03-26	Asymptomatic	1	M	H02	0.0275049	1603	100	1	100	GAGGAGAAGAAGAAGAAGCTTATAGGCAGCTACAAGTACATCGGTGCATCGATCGACAAGGATCTGGCCACCGCGAATGATGGCGTGGCGTACTACAACAAGATGGAGGAGCTCTACAAGACGCACTTGACTGCAGTGAATGCACAGATTAAGAAAGTCGAAGATGATATTAAAAAACAAAATGAGGAGCTTAAAAAGATAGAAAATGAAGCCAATAAAACTGCTGAAAAGGCTAAATTTACTGCCAAAAAGGCCGAGTTGGAGAAGTACCTCCCATTCCTGAATAGCCTCCAAAAGGAGTACGAGTCC	PX841048	NCBI	https://www.ncbi.nlm.nih.gov/nuccore/PX841048
ET_190	Ethiopia	2020-12-21	Symptomatic	0	M	H02	0.0275049	13058	81.9651	2	97.3273	GAGGAGAAGAAGAAGAAGCTTATAGGCAGCTACAAGTACATCGGTGCATCGATCGACAAGGATCTGGCCACCGCGAATGATGGCGTGGCGTACTACAACAAGATGGAGGAGCTCTACAAGACGCACTTGACTGCAGTGAATGCACAGATTAAGAAAGTCGAAGATGATATTAAAAAACAAAATGAGGAGCTTAAAAAGATAGAAAATGAAGCCAATAAAACTGCTGAAAAGGCTAAATTTACTGCCAAAAAGGCCGAGTTGGAGAAGTACCTCCCATTCCTGAATAGCCTCCAAAAGGAGTACGAGTCC	PX841048	NCBI	https://www.ncbi.nlm.nih.gov/nuccore/PX841048
ET_190	Ethiopia	2021-06-17	Symptomatic	1	M	H02	0.0275049	14385	60.8968	2	89.204	GAGGAGAAGAAGAAGAAGCTTATAGGCAGCTACAAGTACATCGGTGCATCGATCGACAAGGATCTGGCCACCGCGAATGATGGCGTGGCGTACTACAACAAGATGGAGGAGCTCTACAAGACGCACTTGACTGCAGTGAATGCACAGATTAAGAAAGTCGAAGATGATATTAAAAAACAAAATGAGGAGCTTAAAAAGATAGAAAATGAAGCCAATAAAACTGCTGAAAAGGCTAAATTTACTGCCAAAAAGGCCGAGTTGGAGAAGTACCTCCCATTCCTGAATAGCCTCCAAAAGGAGTACGAGTCC	PX841048	NCBI	https://www.ncbi.nlm.nih.gov/nuccore/PX841048
ET_191	Ethiopia	2021-06-07	Symptomatic	0	F	H02	0.0275049	6700	74.3881	1	100	GAGGAGAAGAAGAAGAAGCTTATAGGCAGCTACAAGTACATCGGTGCATCGATCGACAAGGATCTGGCCACCGCGAATGATGGCGTGGCGTACTACAACAAGATGGAGGAGCTCTACAAGACGCACTTGACTGCAGTGAATGCACAGATTAAGAAAGTCGAAGATGATATTAAAAAACAAAATGAGGAGCTTAAAAAGATAGAAAATGAAGCCAATAAAACTGCTGAAAAGGCTAAATTTACTGCCAAAAAGGCCGAGTTGGAGAAGTACCTCCCATTCCTGAATAGCCTCCAAAAGGAGTACGAGTCC	PX841048	NCBI	https://www.ncbi.nlm.nih.gov/nuccore/PX841048
ET_191	Ethiopia	2021-11-21	Symptomatic	1	F	H02	0.0275049	4589	87.1214	1	100	GAGGAGAAGAAGAAGAAGCTTATAGGCAGCTACAAGTACATCGGTGCATCGATCGACAAGGATCTGGCCACCGCGAATGATGGCGTGGCGTACTACAACAAGATGGAGGAGCTCTACAAGACGCACTTGACTGCAGTGAATGCACAGATTAAGAAAGTCGAAGATGATATTAAAAAACAAAATGAGGAGCTTAAAAAGATAGAAAATGAAGCCAATAAAACTGCTGAAAAGGCTAAATTTACTGCCAAAAAGGCCGAGTTGGAGAAGTACCTCCCATTCCTGAATAGCCTCCAAAAGGAGTACGAGTCC	PX841048	NCBI	https://www.ncbi.nlm.nih.gov/nuccore/PX841048
ET_192	Ethiopia	2020-12-14	Symptomatic	0	M	H09	0.894651	11231	70.6438	2	97.2309	GAGGAGAAGAAGAAGAAGCTTATAGGCAGCTACAAGTACATCGGTGCATCGATCGACAAGGATCTGGCCACCGCGAATGATGGCGTGGCGTACTACAACAAGATGGAGGAGCTCTACAAGACGCACTTGACTGCAGTGAATGCACAGATTAAGAAAGTCGAAGATGATATTAAAAAACAAAATGAGGAGCTTAAAAAGATAGAAAATGAAGCCAATAAAACTGCTGAAAAGGCTAAATTTACTGCCAAAAAGGCCGAGCTGGAGAAGTACCTCCCGTTCCTGAATAGCCTCCAAAAGGAGTACGAGTCC	PX841053	NCBI	https://www.ncbi.nlm.nih.gov/nuccore/PX841053
ET_193	Ethiopia	2021-05-06	Symptomatic	0	F	H01	0.00892495	14308	74.7414	2	97.0646	GAGGAGAAGAAGAAGAAGCTTATAGGCAGCTACAAGTACATCGGTGCATCGATCGACATGGATCTGGCCACCGCGAATGATGGCGTGGCGTACTACAACAAGATGGAGGAGCTCTACAAGACGCACTTGGATGGAGTGAAAACAGAGATTAAGAAAGTCGAAGATGATATTAAAAAACATGATGAGAAGCTTAAAAAGATAGAAAATGAAGCCAGTAAAACTAGTGAAAAGACCCAATTGAATGCCAAAAAGGCCGAGCTGGAGAAGTACCTCCCGTTCCTGAATAGCCTCCAAAAGGAGTACGAGTCC	PX841046	NCBI	https://www.ncbi.nlm.nih.gov/nuccore/PX841046
ET_193	Ethiopia	2021-07-05	Symptomatic	1	F	H01	0.00892495	2464	74.4318	1	100	GAGGAGAAGAAGAAGAAGCTTATAGGCAGCTACAAGTACATCGGTGCATCGATCGACATGGATCTGGCCACCGCGAATGATGGCGTGGCGTACTACAACAAGATGGAGGAGCTCTACAAGACGCACTTGGATGGAGTGAAAACAGAGATTAAGAAAGTCGAAGATGATATTAAAAAACATGATGAGAAGCTTAAAAAGATAGAAAATGAAGCCAGTAAAACTAGTGAAAAGACCCAATTGAATGCCAAAAAGGCCGAGCTGGAGAAGTACCTCCCGTTCCTGAATAGCCTCCAAAAGGAGTACGAGTCC	PX841046	NCBI	https://www.ncbi.nlm.nih.gov/nuccore/PX841046
ET_195	Ethiopia	2021-06-20	Symptomatic	0	M	H06	0.0245161	10197	37.6091	2	51.2504	GAGGAGAAGAAGAAGAAGCTTCTAGGCAGCTACAAGTACATCGGTGCATCGATCGACAAGGATCTGGCCACCGCGAATGATGGCGTGACCTACTACAACAAGATGGGGGAGCTCTACAAGACGCACTTGGATGGAGTGAAAACAGAGATTAAGAAAGTCGAAGATGATATTAAAAAGCAAGATGAGGAACTTAAAAAGATAGAAAATGTTACCAGTAAAACTAGTAAAAAGAACGAATTTATTGCCAAAAAGGCCGAGCTGGAGAAGTACCTCCCGTTCCTGAATAGCCTCCAAAAGGAGTACGAGTCC	PX841051	NCBI	https://www.ncbi.nlm.nih.gov/nuccore/PX841051
ET_195	Ethiopia	2021-07-26	Symptomatic	1	M	H02	0.0275049	18664	45.6708	2	64.9861	GAGGAGAAGAAGAAGAAGCTTATAGGCAGCTACAAGTACATCGGTGCATCGATCGACAAGGATCTGGCCACCGCGAATGATGGCGTGGCGTACTACAACAAGATGGAGGAGCTCTACAAGACGCACTTGACTGCAGTGAATGCACAGATTAAGAAAGTCGAAGATGATATTAAAAAACAAAATGAGGAGCTTAAAAAGATAGAAAATGAAGCCAATAAAACTGCTGAAAAGGCTAAATTTACTGCCAAAAAGGCCGAGTTGGAGAAGTACCTCCCATTCCTGAATAGCCTCCAAAAGGAGTACGAGTCC	PX841048	NCBI	https://www.ncbi.nlm.nih.gov/nuccore/PX841048
ET_196	Ethiopia	2019-11-14	Symptomatic	0	M	H02	0.0275049	3167	77.6445	1	100	GAGGAGAAGAAGAAGAAGCTTATAGGCAGCTACAAGTACATCGGTGCATCGATCGACAAGGATCTGGCCACCGCGAATGATGGCGTGGCGTACTACAACAAGATGGAGGAGCTCTACAAGACGCACTTGACTGCAGTGAATGCACAGATTAAGAAAGTCGAAGATGATATTAAAAAACAAAATGAGGAGCTTAAAAAGATAGAAAATGAAGCCAATAAAACTGCTGAAAAGGCTAAATTTACTGCCAAAAAGGCCGAGTTGGAGAAGTACCTCCCATTCCTGAATAGCCTCCAAAAGGAGTACGAGTCC	PX841048	NCBI	https://www.ncbi.nlm.nih.gov/nuccore/PX841048
ET_196	Ethiopia	2020-01-24	Asymptomatic	1	M	H02	0.0275049	7291	72.2535	1	100	GAGGAGAAGAAGAAGAAGCTTATAGGCAGCTACAAGTACATCGGTGCATCGATCGACAAGGATCTGGCCACCGCGAATGATGGCGTGGCGTACTACAACAAGATGGAGGAGCTCTACAAGACGCACTTGACTGCAGTGAATGCACAGATTAAGAAAGTCGAAGATGATATTAAAAAACAAAATGAGGAGCTTAAAAAGATAGAAAATGAAGCCAATAAAACTGCTGAAAAGGCTAAATTTACTGCCAAAAAGGCCGAGTTGGAGAAGTACCTCCCATTCCTGAATAGCCTCCAAAAGGAGTACGAGTCC	PX841048	NCBI	https://www.ncbi.nlm.nih.gov/nuccore/PX841048
ET_196	Ethiopia	2020-03-16	Asymptomatic	2	M	H02	0.0275049	11069	68.4795	2	98.2474	GAGGAGAAGAAGAAGAAGCTTATAGGCAGCTACAAGTACATCGGTGCATCGATCGACAAGGATCTGGCCACCGCGAATGATGGCGTGGCGTACTACAACAAGATGGAGGAGCTCTACAAGACGCACTTGACTGCAGTGAATGCACAGATTAAGAAAGTCGAAGATGATATTAAAAAACAAAATGAGGAGCTTAAAAAGATAGAAAATGAAGCCAATAAAACTGCTGAAAAGGCTAAATTTACTGCCAAAAAGGCCGAGTTGGAGAAGTACCTCCCATTCCTGAATAGCCTCCAAAAGGAGTACGAGTCC	PX841048	NCBI	https://www.ncbi.nlm.nih.gov/nuccore/PX841048
ET_197	Ethiopia	2021-05-04	Symptomatic	0	F	H02	0.0275049	9198	71.1242	1	100	GAGGAGAAGAAGAAGAAGCTTATAGGCAGCTACAAGTACATCGGTGCATCGATCGACAAGGATCTGGCCACCGCGAATGATGGCGTGGCGTACTACAACAAGATGGAGGAGCTCTACAAGACGCACTTGACTGCAGTGAATGCACAGATTAAGAAAGTCGAAGATGATATTAAAAAACAAAATGAGGAGCTTAAAAAGATAGAAAATGAAGCCAATAAAACTGCTGAAAAGGCTAAATTTACTGCCAAAAAGGCCGAGTTGGAGAAGTACCTCCCATTCCTGAATAGCCTCCAAAAGGAGTACGAGTCC	PX841048	NCBI	https://www.ncbi.nlm.nih.gov/nuccore/PX841048
ET_197	Ethiopia	2021-06-09	Asymptomatic	1	F	H02	0.0275049	3369	64.3811	1	100	GAGGAGAAGAAGAAGAAGCTTATAGGCAGCTACAAGTACATCGGTGCATCGATCGACAAGGATCTGGCCACCGCGAATGATGGCGTGGCGTACTACAACAAGATGGAGGAGCTCTACAAGACGCACTTGACTGCAGTGAATGCACAGATTAAGAAAGTCGAAGATGATATTAAAAAACAAAATGAGGAGCTTAAAAAGATAGAAAATGAAGCCAATAAAACTGCTGAAAAGGCTAAATTTACTGCCAAAAAGGCCGAGTTGGAGAAGTACCTCCCATTCCTGAATAGCCTCCAAAAGGAGTACGAGTCC	PX841048	NCBI	https://www.ncbi.nlm.nih.gov/nuccore/PX841048
ET_197	Ethiopia	2021-08-05	Asymptomatic	2	F	H46	0.648284	5331	40.4615	2	64.8284	GAGGAGAAGAAGAAGAAGCTTATAGGCAGCTACAAGTACATCGGTGCATCGATCGACATGGATCTGGCCACCGCGTATGATGGCGTGGCGTACTACAACAAGATGGAGGAGCTCTACAAGACGCACTTGGATGGAGTGAAAACAGAGATTAAGAAAGTCGAAGATGATATTAAAAAACATGATGAGAAGCTTAAAAAGATAGAAAATGAAGCCAGTAAAACTAGTGAAAAGACCCAATTGAATGCCAAAAAGGCCGAGCTGGAGAAGTACCTCCCGTTCCTGAATAGCCTCCAAAAGGAGTACGAGTCC	PX841068	NCBI	https://www.ncbi.nlm.nih.gov/nuccore/PX841068
ET_198	Ethiopia	2020-09-22	Symptomatic	0	M	H08	0.487496	12906	71.9743	1	100	GAGGAGAAGAAGAAGAAGCTTATAGGCAGCTACAAGTACATCGGTGCATCGATCGACATGGATCTGGCCACCGCGAATGATGGCGTGGCGTACTACAACAAGATGGAGGAGCTCTACAAGACGCACTTGACTGCAGTGAATGCACAGATTAAGAAAGTCGAAGATGATATTAAAAAACAAAATGAGGAGCTTAAAAAGATAGAAAATGATACCACTAAAACTACTGAAAAGGCTAAATTTACTGCCAAAAAGGCCGAGCTGGAGAAGTACCTCCCGTTCCTGAATAGCCTCCAAAAGGAGTACGAGTCC	PX841057	NCBI	https://www.ncbi.nlm.nih.gov/nuccore/PX841057
ET_198	Ethiopia	2020-11-19	Asymptomatic	1	M	H08	0.487496	5358	80.1045	1	100	GAGGAGAAGAAGAAGAAGCTTATAGGCAGCTACAAGTACATCGGTGCATCGATCGACATGGATCTGGCCACCGCGAATGATGGCGTGGCGTACTACAACAAGATGGAGGAGCTCTACAAGACGCACTTGACTGCAGTGAATGCACAGATTAAGAAAGTCGAAGATGATATTAAAAAACAAAATGAGGAGCTTAAAAAGATAGAAAATGATACCACTAAAACTACTGAAAAGGCTAAATTTACTGCCAAAAAGGCCGAGCTGGAGAAGTACCTCCCGTTCCTGAATAGCCTCCAAAAGGAGTACGAGTCC	PX841057	NCBI	https://www.ncbi.nlm.nih.gov/nuccore/PX841057
ET_198	Ethiopia	2020-12-23	Asymptomatic	2	M	H08	0.487496	3357	66.9348	1	100	GAGGAGAAGAAGAAGAAGCTTATAGGCAGCTACAAGTACATCGGTGCATCGATCGACATGGATCTGGCCACCGCGAATGATGGCGTGGCGTACTACAACAAGATGGAGGAGCTCTACAAGACGCACTTGACTGCAGTGAATGCACAGATTAAGAAAGTCGAAGATGATATTAAAAAACAAAATGAGGAGCTTAAAAAGATAGAAAATGATACCACTAAAACTACTGAAAAGGCTAAATTTACTGCCAAAAAGGCCGAGCTGGAGAAGTACCTCCCGTTCCTGAATAGCCTCCAAAAGGAGTACGAGTCC	PX841057	NCBI	https://www.ncbi.nlm.nih.gov/nuccore/PX841057
ET_199	Ethiopia	2020-10-12	Symptomatic	0	F	H02	0.0275049	4294	82.2077	1	100	GAGGAGAAGAAGAAGAAGCTTATAGGCAGCTACAAGTACATCGGTGCATCGATCGACAAGGATCTGGCCACCGCGAATGATGGCGTGGCGTACTACAACAAGATGGAGGAGCTCTACAAGACGCACTTGACTGCAGTGAATGCACAGATTAAGAAAGTCGAAGATGATATTAAAAAACAAAATGAGGAGCTTAAAAAGATAGAAAATGAAGCCAATAAAACTGCTGAAAAGGCTAAATTTACTGCCAAAAAGGCCGAGTTGGAGAAGTACCTCCCATTCCTGAATAGCCTCCAAAAGGAGTACGAGTCC	PX841048	NCBI	https://www.ncbi.nlm.nih.gov/nuccore/PX841048
ET_199	Ethiopia	2020-11-22	Asymptomatic	1	F	H02	0.0275049	14774	64.7692	1	100	GAGGAGAAGAAGAAGAAGCTTATAGGCAGCTACAAGTACATCGGTGCATCGATCGACAAGGATCTGGCCACCGCGAATGATGGCGTGGCGTACTACAACAAGATGGAGGAGCTCTACAAGACGCACTTGACTGCAGTGAATGCACAGATTAAGAAAGTCGAAGATGATATTAAAAAACAAAATGAGGAGCTTAAAAAGATAGAAAATGAAGCCAATAAAACTGCTGAAAAGGCTAAATTTACTGCCAAAAAGGCCGAGTTGGAGAAGTACCTCCCATTCCTGAATAGCCTCCAAAAGGAGTACGAGTCC	PX841048	NCBI	https://www.ncbi.nlm.nih.gov/nuccore/PX841048
ET_199	Ethiopia	2021-05-24	Asymptomatic	2	F	H02	0.0275049	7961	76.1085	1	100	GAGGAGAAGAAGAAGAAGCTTATAGGCAGCTACAAGTACATCGGTGCATCGATCGACAAGGATCTGGCCACCGCGAATGATGGCGTGGCGTACTACAACAAGATGGAGGAGCTCTACAAGACGCACTTGACTGCAGTGAATGCACAGATTAAGAAAGTCGAAGATGATATTAAAAAACAAAATGAGGAGCTTAAAAAGATAGAAAATGAAGCCAATAAAACTGCTGAAAAGGCTAAATTTACTGCCAAAAAGGCCGAGTTGGAGAAGTACCTCCCATTCCTGAATAGCCTCCAAAAGGAGTACGAGTCC	PX841048	NCBI	https://www.ncbi.nlm.nih.gov/nuccore/PX841048
ET_200	Ethiopia	2020-11-05	Symptomatic	0	M	H02	0.0275049	13825	73.6637	2	97.2369	GAGGAGAAGAAGAAGAAGCTTATAGGCAGCTACAAGTACATCGGTGCATCGATCGACAAGGATCTGGCCACCGCGAATGATGGCGTGGCGTACTACAACAAGATGGAGGAGCTCTACAAGACGCACTTGACTGCAGTGAATGCACAGATTAAGAAAGTCGAAGATGATATTAAAAAACAAAATGAGGAGCTTAAAAAGATAGAAAATGAAGCCAATAAAACTGCTGAAAAGGCTAAATTTACTGCCAAAAAGGCCGAGTTGGAGAAGTACCTCCCATTCCTGAATAGCCTCCAAAAGGAGTACGAGTCC	PX841048	NCBI	https://www.ncbi.nlm.nih.gov/nuccore/PX841048
ET_200	Ethiopia	2020-12-24	Asymptomatic	1	M	H02	0.0275049	10864	71.401	1	100	GAGGAGAAGAAGAAGAAGCTTATAGGCAGCTACAAGTACATCGGTGCATCGATCGACAAGGATCTGGCCACCGCGAATGATGGCGTGGCGTACTACAACAAGATGGAGGAGCTCTACAAGACGCACTTGACTGCAGTGAATGCACAGATTAAGAAAGTCGAAGATGATATTAAAAAACAAAATGAGGAGCTTAAAAAGATAGAAAATGAAGCCAATAAAACTGCTGAAAAGGCTAAATTTACTGCCAAAAAGGCCGAGTTGGAGAAGTACCTCCCATTCCTGAATAGCCTCCAAAAGGAGTACGAGTCC	PX841048	NCBI	https://www.ncbi.nlm.nih.gov/nuccore/PX841048
ET_200	Ethiopia	2021-04-05	Asymptomatic	2	M	H02	0.0275049	2674	65.5198	1	100	GAGGAGAAGAAGAAGAAGCTTATAGGCAGCTACAAGTACATCGGTGCATCGATCGACAAGGATCTGGCCACCGCGAATGATGGCGTGGCGTACTACAACAAGATGGAGGAGCTCTACAAGACGCACTTGACTGCAGTGAATGCACAGATTAAGAAAGTCGAAGATGATATTAAAAAACAAAATGAGGAGCTTAAAAAGATAGAAAATGAAGCCAATAAAACTGCTGAAAAGGCTAAATTTACTGCCAAAAAGGCCGAGTTGGAGAAGTACCTCCCATTCCTGAATAGCCTCCAAAAGGAGTACGAGTCC	PX841048	NCBI	https://www.ncbi.nlm.nih.gov/nuccore/PX841048
ET_201	Ethiopia	2020-11-10	Symptomatic	0	F	H02	0.0275049	14730	72.9939	2	96.4019	GAGGAGAAGAAGAAGAAGCTTATAGGCAGCTACAAGTACATCGGTGCATCGATCGACAAGGATCTGGCCACCGCGAATGATGGCGTGGCGTACTACAACAAGATGGAGGAGCTCTACAAGACGCACTTGACTGCAGTGAATGCACAGATTAAGAAAGTCGAAGATGATATTAAAAAACAAAATGAGGAGCTTAAAAAGATAGAAAATGAAGCCAATAAAACTGCTGAAAAGGCTAAATTTACTGCCAAAAAGGCCGAGTTGGAGAAGTACCTCCCATTCCTGAATAGCCTCCAAAAGGAGTACGAGTCC	PX841048	NCBI	https://www.ncbi.nlm.nih.gov/nuccore/PX841048
ET_201	Ethiopia	2021-04-27	Asymptomatic	1	F	H01	0.00892495	11233	71.6549	2	97.997	GAGGAGAAGAAGAAGAAGCTTATAGGCAGCTACAAGTACATCGGTGCATCGATCGACATGGATCTGGCCACCGCGAATGATGGCGTGGCGTACTACAACAAGATGGAGGAGCTCTACAAGACGCACTTGGATGGAGTGAAAACAGAGATTAAGAAAGTCGAAGATGATATTAAAAAACATGATGAGAAGCTTAAAAAGATAGAAAATGAAGCCAGTAAAACTAGTGAAAAGACCCAATTGAATGCCAAAAAGGCCGAGCTGGAGAAGTACCTCCCGTTCCTGAATAGCCTCCAAAAGGAGTACGAGTCC	PX841046	NCBI	https://www.ncbi.nlm.nih.gov/nuccore/PX841046
ET_201	Ethiopia	2021-07-14	Asymptomatic	2	F	H02	0.0275049	6482	71.6137	1	100	GAGGAGAAGAAGAAGAAGCTTATAGGCAGCTACAAGTACATCGGTGCATCGATCGACAAGGATCTGGCCACCGCGAATGATGGCGTGGCGTACTACAACAAGATGGAGGAGCTCTACAAGACGCACTTGACTGCAGTGAATGCACAGATTAAGAAAGTCGAAGATGATATTAAAAAACAAAATGAGGAGCTTAAAAAGATAGAAAATGAAGCCAATAAAACTGCTGAAAAGGCTAAATTTACTGCCAAAAAGGCCGAGTTGGAGAAGTACCTCCCATTCCTGAATAGCCTCCAAAAGGAGTACGAGTCC	PX841048	NCBI	https://www.ncbi.nlm.nih.gov/nuccore/PX841048
ET_202	Ethiopia	2020-10-19	Symptomatic	0	M	H02	0.0275049	6198	63.1171	1	100	GAGGAGAAGAAGAAGAAGCTTATAGGCAGCTACAAGTACATCGGTGCATCGATCGACAAGGATCTGGCCACCGCGAATGATGGCGTGGCGTACTACAACAAGATGGAGGAGCTCTACAAGACGCACTTGACTGCAGTGAATGCACAGATTAAGAAAGTCGAAGATGATATTAAAAAACAAAATGAGGAGCTTAAAAAGATAGAAAATGAAGCCAATAAAACTGCTGAAAAGGCTAAATTTACTGCCAAAAAGGCCGAGTTGGAGAAGTACCTCCCATTCCTGAATAGCCTCCAAAAGGAGTACGAGTCC	PX841048	NCBI	https://www.ncbi.nlm.nih.gov/nuccore/PX841048
ET_202	Ethiopia	2021-03-17	Asymptomatic	1	M	H02	0.0275049	6587	81.8278	1	100	GAGGAGAAGAAGAAGAAGCTTATAGGCAGCTACAAGTACATCGGTGCATCGATCGACAAGGATCTGGCCACCGCGAATGATGGCGTGGCGTACTACAACAAGATGGAGGAGCTCTACAAGACGCACTTGACTGCAGTGAATGCACAGATTAAGAAAGTCGAAGATGATATTAAAAAACAAAATGAGGAGCTTAAAAAGATAGAAAATGAAGCCAATAAAACTGCTGAAAAGGCTAAATTTACTGCCAAAAAGGCCGAGTTGGAGAAGTACCTCCCATTCCTGAATAGCCTCCAAAAGGAGTACGAGTCC	PX841048	NCBI	https://www.ncbi.nlm.nih.gov/nuccore/PX841048
ET_202	Ethiopia	2021-09-20	Asymptomatic	2	M	H08	0.487496	11260	65.5151	3	83.3925	GAGGAGAAGAAGAAGAAGCTTATAGGCAGCTACAAGTACATCGGTGCATCGATCGACATGGATCTGGCCACCGCGAATGATGGCGTGGCGTACTACAACAAGATGGAGGAGCTCTACAAGACGCACTTGACTGCAGTGAATGCACAGATTAAGAAAGTCGAAGATGATATTAAAAAACAAAATGAGGAGCTTAAAAAGATAGAAAATGATACCACTAAAACTACTGAAAAGGCTAAATTTACTGCCAAAAAGGCCGAGCTGGAGAAGTACCTCCCGTTCCTGAATAGCCTCCAAAAGGAGTACGAGTCC	PX841057	NCBI	https://www.ncbi.nlm.nih.gov/nuccore/PX841057
ET_203	Ethiopia	2020-12-23	Symptomatic	0	M	H01	0.00892495	9878	59.0605	3	91.6481	GAGGAGAAGAAGAAGAAGCTTATAGGCAGCTACAAGTACATCGGTGCATCGATCGACATGGATCTGGCCACCGCGAATGATGGCGTGGCGTACTACAACAAGATGGAGGAGCTCTACAAGACGCACTTGGATGGAGTGAAAACAGAGATTAAGAAAGTCGAAGATGATATTAAAAAACATGATGAGAAGCTTAAAAAGATAGAAAATGAAGCCAGTAAAACTAGTGAAAAGACCCAATTGAATGCCAAAAAGGCCGAGCTGGAGAAGTACCTCCCGTTCCTGAATAGCCTCCAAAAGGAGTACGAGTCC	PX841046	NCBI	https://www.ncbi.nlm.nih.gov/nuccore/PX841046
ET_203	Ethiopia	2021-02-21	Asymptomatic	1	M	H01	0.00892495	5191	59.8536	1	100	GAGGAGAAGAAGAAGAAGCTTATAGGCAGCTACAAGTACATCGGTGCATCGATCGACATGGATCTGGCCACCGCGAATGATGGCGTGGCGTACTACAACAAGATGGAGGAGCTCTACAAGACGCACTTGGATGGAGTGAAAACAGAGATTAAGAAAGTCGAAGATGATATTAAAAAACATGATGAGAAGCTTAAAAAGATAGAAAATGAAGCCAGTAAAACTAGTGAAAAGACCCAATTGAATGCCAAAAAGGCCGAGCTGGAGAAGTACCTCCCGTTCCTGAATAGCCTCCAAAAGGAGTACGAGTCC	PX841046	NCBI	https://www.ncbi.nlm.nih.gov/nuccore/PX841046
ET_203	Ethiopia	2021-04-27	Asymptomatic	2	M	H01	0.00892495	1771	51.5528	1	100	GAGGAGAAGAAGAAGAAGCTTATAGGCAGCTACAAGTACATCGGTGCATCGATCGACATGGATCTGGCCACCGCGAATGATGGCGTGGCGTACTACAACAAGATGGAGGAGCTCTACAAGACGCACTTGGATGGAGTGAAAACAGAGATTAAGAAAGTCGAAGATGATATTAAAAAACATGATGAGAAGCTTAAAAAGATAGAAAATGAAGCCAGTAAAACTAGTGAAAAGACCCAATTGAATGCCAAAAAGGCCGAGCTGGAGAAGTACCTCCCGTTCCTGAATAGCCTCCAAAAGGAGTACGAGTCC	PX841046	NCBI	https://www.ncbi.nlm.nih.gov/nuccore/PX841046
ET_204	Ethiopia	2020-10-23	Symptomatic	0	F	H02	0.0275049	11953	73.8225	2	97.3479	GAGGAGAAGAAGAAGAAGCTTATAGGCAGCTACAAGTACATCGGTGCATCGATCGACAAGGATCTGGCCACCGCGAATGATGGCGTGGCGTACTACAACAAGATGGAGGAGCTCTACAAGACGCACTTGACTGCAGTGAATGCACAGATTAAGAAAGTCGAAGATGATATTAAAAAACAAAATGAGGAGCTTAAAAAGATAGAAAATGAAGCCAATAAAACTGCTGAAAAGGCTAAATTTACTGCCAAAAAGGCCGAGTTGGAGAAGTACCTCCCATTCCTGAATAGCCTCCAAAAGGAGTACGAGTCC	PX841048	NCBI	https://www.ncbi.nlm.nih.gov/nuccore/PX841048
ET_204	Ethiopia	2020-12-08	Symptomatic	1	F	H02	0.0275049	5219	70.2433	1	100	GAGGAGAAGAAGAAGAAGCTTATAGGCAGCTACAAGTACATCGGTGCATCGATCGACAAGGATCTGGCCACCGCGAATGATGGCGTGGCGTACTACAACAAGATGGAGGAGCTCTACAAGACGCACTTGACTGCAGTGAATGCACAGATTAAGAAAGTCGAAGATGATATTAAAAAACAAAATGAGGAGCTTAAAAAGATAGAAAATGAAGCCAATAAAACTGCTGAAAAGGCTAAATTTACTGCCAAAAAGGCCGAGTTGGAGAAGTACCTCCCATTCCTGAATAGCCTCCAAAAGGAGTACGAGTCC	PX841048	NCBI	https://www.ncbi.nlm.nih.gov/nuccore/PX841048
ET_204	Ethiopia	2021-02-04	Symptomatic	2	F	H02	0.0275049	18055	67.6322	1	100	GAGGAGAAGAAGAAGAAGCTTATAGGCAGCTACAAGTACATCGGTGCATCGATCGACAAGGATCTGGCCACCGCGAATGATGGCGTGGCGTACTACAACAAGATGGAGGAGCTCTACAAGACGCACTTGACTGCAGTGAATGCACAGATTAAGAAAGTCGAAGATGATATTAAAAAACAAAATGAGGAGCTTAAAAAGATAGAAAATGAAGCCAATAAAACTGCTGAAAAGGCTAAATTTACTGCCAAAAAGGCCGAGTTGGAGAAGTACCTCCCATTCCTGAATAGCCTCCAAAAGGAGTACGAGTCC	PX841048	NCBI	https://www.ncbi.nlm.nih.gov/nuccore/PX841048
ET_205	Ethiopia	2020-11-22	Symptomatic	0	F	H07	0.0637647	8169	76.8515	2	97.5762	GAGGAGAAGAAGAAGAAGCTTCTAGGCAGCTACAAGTACATCGGTGCATCGATCGACAAGGATCTGGCCACCGCGAATGATGGCGTGGCGTACTACAACAAGATGGAGGAGCTCTACAAGACGCACTTGACTGCAGTGAATGCACAGATTAAGAAAGTCGAAGATGATATTAAAAAGCAAGATGAGGAGCTTAAAAAGATAGAAAATGAAGCCAATAAAACTGCTGAAAAGGCTAAATTTACTGCCAAAAAGGCCGAGTTGGAGAAGTACCTCCCATTCCTGAATAGCCTCCAAAAGGAGTACGAGTCC	PX841049	NCBI	https://www.ncbi.nlm.nih.gov/nuccore/PX841049
ET_205	Ethiopia	2021-01-21	Asymptomatic	1	F	H07	0.0637647	10248	77.2834	2	96.2237	GAGGAGAAGAAGAAGAAGCTTCTAGGCAGCTACAAGTACATCGGTGCATCGATCGACAAGGATCTGGCCACCGCGAATGATGGCGTGGCGTACTACAACAAGATGGAGGAGCTCTACAAGACGCACTTGACTGCAGTGAATGCACAGATTAAGAAAGTCGAAGATGATATTAAAAAGCAAGATGAGGAGCTTAAAAAGATAGAAAATGAAGCCAATAAAACTGCTGAAAAGGCTAAATTTACTGCCAAAAAGGCCGAGTTGGAGAAGTACCTCCCATTCCTGAATAGCCTCCAAAAGGAGTACGAGTCC	PX841049	NCBI	https://www.ncbi.nlm.nih.gov/nuccore/PX841049
ET_206	Ethiopia	2020-11-18	Symptomatic	0	M	H01	0.00892495	7520	69.7473	3	94.4415	GAGGAGAAGAAGAAGAAGCTTATAGGCAGCTACAAGTACATCGGTGCATCGATCGACATGGATCTGGCCACCGCGAATGATGGCGTGGCGTACTACAACAAGATGGAGGAGCTCTACAAGACGCACTTGGATGGAGTGAAAACAGAGATTAAGAAAGTCGAAGATGATATTAAAAAACATGATGAGAAGCTTAAAAAGATAGAAAATGAAGCCAGTAAAACTAGTGAAAAGACCCAATTGAATGCCAAAAAGGCCGAGCTGGAGAAGTACCTCCCGTTCCTGAATAGCCTCCAAAAGGAGTACGAGTCC	PX841046	NCBI	https://www.ncbi.nlm.nih.gov/nuccore/PX841046
ET_206	Ethiopia	2021-02-13	Symptomatic	1	M	H01	0.00892495	2863	70.9046	1	100	GAGGAGAAGAAGAAGAAGCTTATAGGCAGCTACAAGTACATCGGTGCATCGATCGACATGGATCTGGCCACCGCGAATGATGGCGTGGCGTACTACAACAAGATGGAGGAGCTCTACAAGACGCACTTGGATGGAGTGAAAACAGAGATTAAGAAAGTCGAAGATGATATTAAAAAACATGATGAGAAGCTTAAAAAGATAGAAAATGAAGCCAGTAAAACTAGTGAAAAGACCCAATTGAATGCCAAAAAGGCCGAGCTGGAGAAGTACCTCCCGTTCCTGAATAGCCTCCAAAAGGAGTACGAGTCC	PX841046	NCBI	https://www.ncbi.nlm.nih.gov/nuccore/PX841046
ET_206	Ethiopia	2021-05-03	Symptomatic	2	M	H01	0.00892495	794	100	1	100	GAGGAGAAGAAGAAGAAGCTTATAGGCAGCTACAAGTACATCGGTGCATCGATCGACATGGATCTGGCCACCGCGAATGATGGCGTGGCGTACTACAACAAGATGGAGGAGCTCTACAAGACGCACTTGGATGGAGTGAAAACAGAGATTAAGAAAGTCGAAGATGATATTAAAAAACATGATGAGAAGCTTAAAAAGATAGAAAATGAAGCCAGTAAAACTAGTGAAAAGACCCAATTGAATGCCAAAAAGGCCGAGCTGGAGAAGTACCTCCCGTTCCTGAATAGCCTCCAAAAGGAGTACGAGTCC	PX841046	NCBI	https://www.ncbi.nlm.nih.gov/nuccore/PX841046
ET_207	Ethiopia	2021-06-21	Symptomatic	0	M	H03	0.0231214	4712	70.798	1	100	GAGGAGAAGAAGAAGAAGCTTATAGGCAGCTACAAGTACATCGGTGCATCGATCGACATGGATCTGGCCACCGCGAATGATGGCGTGGCGTACTACAACAAGATGGAGGAGCTCTACAAGACGCACTTGACTGCAGTGAATGAAGAGGTTAAGAAAGTCGAAGCTGATATTAAAAAAGAAGATGATAAGATTAAAAAGATAGAAAATGATACCACTAAAACTACTGAAAAGACCCAATCGATGGCCAAAAAGGCCGAGCTGGAGAAGTACCTCCCGTTCCTGAATAGCCTCCAAAAGGAGTACGAGTCC	PX841052	NCBI	https://www.ncbi.nlm.nih.gov/nuccore/PX841052
ET_207	Ethiopia	2021-08-22	Symptomatic	1	M	H03	0.0231214	9817	71.2336	1	100	GAGGAGAAGAAGAAGAAGCTTATAGGCAGCTACAAGTACATCGGTGCATCGATCGACATGGATCTGGCCACCGCGAATGATGGCGTGGCGTACTACAACAAGATGGAGGAGCTCTACAAGACGCACTTGACTGCAGTGAATGAAGAGGTTAAGAAAGTCGAAGCTGATATTAAAAAAGAAGATGATAAGATTAAAAAGATAGAAAATGATACCACTAAAACTACTGAAAAGACCCAATCGATGGCCAAAAAGGCCGAGCTGGAGAAGTACCTCCCGTTCCTGAATAGCCTCCAAAAGGAGTACGAGTCC	PX841052	NCBI	https://www.ncbi.nlm.nih.gov/nuccore/PX841052
ET_207	Ethiopia	2021-10-08	Symptomatic	2	M	H03	0.0231214	3437	71.545	1	100	GAGGAGAAGAAGAAGAAGCTTATAGGCAGCTACAAGTACATCGGTGCATCGATCGACATGGATCTGGCCACCGCGAATGATGGCGTGGCGTACTACAACAAGATGGAGGAGCTCTACAAGACGCACTTGACTGCAGTGAATGAAGAGGTTAAGAAAGTCGAAGCTGATATTAAAAAAGAAGATGATAAGATTAAAAAGATAGAAAATGATACCACTAAAACTACTGAAAAGACCCAATCGATGGCCAAAAAGGCCGAGCTGGAGAAGTACCTCCCGTTCCTGAATAGCCTCCAAAAGGAGTACGAGTCC	PX841052	NCBI	https://www.ncbi.nlm.nih.gov/nuccore/PX841052
ET_208	Ethiopia	2020-09-30	Symptomatic	0	M	H01	0.00892495	13116	73.5438	1	100	GAGGAGAAGAAGAAGAAGCTTATAGGCAGCTACAAGTACATCGGTGCATCGATCGACATGGATCTGGCCACCGCGAATGATGGCGTGGCGTACTACAACAAGATGGAGGAGCTCTACAAGACGCACTTGGATGGAGTGAAAACAGAGATTAAGAAAGTCGAAGATGATATTAAAAAACATGATGAGAAGCTTAAAAAGATAGAAAATGAAGCCAGTAAAACTAGTGAAAAGACCCAATTGAATGCCAAAAAGGCCGAGCTGGAGAAGTACCTCCCGTTCCTGAATAGCCTCCAAAAGGAGTACGAGTCC	PX841046	NCBI	https://www.ncbi.nlm.nih.gov/nuccore/PX841046
ET_208	Ethiopia	2020-11-02	Asymptomatic	1	M	H01	0.00892495	10386	66.6667	1	100	GAGGAGAAGAAGAAGAAGCTTATAGGCAGCTACAAGTACATCGGTGCATCGATCGACATGGATCTGGCCACCGCGAATGATGGCGTGGCGTACTACAACAAGATGGAGGAGCTCTACAAGACGCACTTGGATGGAGTGAAAACAGAGATTAAGAAAGTCGAAGATGATATTAAAAAACATGATGAGAAGCTTAAAAAGATAGAAAATGAAGCCAGTAAAACTAGTGAAAAGACCCAATTGAATGCCAAAAAGGCCGAGCTGGAGAAGTACCTCCCGTTCCTGAATAGCCTCCAAAAGGAGTACGAGTCC	PX841046	NCBI	https://www.ncbi.nlm.nih.gov/nuccore/PX841046
ET_208	Ethiopia	2020-12-07	Asymptomatic	2	M	H01	0.00892495	14244	68.1059	1	100	GAGGAGAAGAAGAAGAAGCTTATAGGCAGCTACAAGTACATCGGTGCATCGATCGACATGGATCTGGCCACCGCGAATGATGGCGTGGCGTACTACAACAAGATGGAGGAGCTCTACAAGACGCACTTGGATGGAGTGAAAACAGAGATTAAGAAAGTCGAAGATGATATTAAAAAACATGATGAGAAGCTTAAAAAGATAGAAAATGAAGCCAGTAAAACTAGTGAAAAGACCCAATTGAATGCCAAAAAGGCCGAGCTGGAGAAGTACCTCCCGTTCCTGAATAGCCTCCAAAAGGAGTACGAGTCC	PX841046	NCBI	https://www.ncbi.nlm.nih.gov/nuccore/PX841046
ET_208	Ethiopia	2021-02-15	Asymptomatic	3	M	H01	0.00892495	14172	63.2444	3	95.8721	GAGGAGAAGAAGAAGAAGCTTATAGGCAGCTACAAGTACATCGGTGCATCGATCGACATGGATCTGGCCACCGCGAATGATGGCGTGGCGTACTACAACAAGATGGAGGAGCTCTACAAGACGCACTTGGATGGAGTGAAAACAGAGATTAAGAAAGTCGAAGATGATATTAAAAAACATGATGAGAAGCTTAAAAAGATAGAAAATGAAGCCAGTAAAACTAGTGAAAAGACCCAATTGAATGCCAAAAAGGCCGAGCTGGAGAAGTACCTCCCGTTCCTGAATAGCCTCCAAAAGGAGTACGAGTCC	PX841046	NCBI	https://www.ncbi.nlm.nih.gov/nuccore/PX841046
ET_209	Ethiopia	2021-02-25	Symptomatic	0	M	H01	0.00892495	21947	62.6965	3	92.7963	GAGGAGAAGAAGAAGAAGCTTATAGGCAGCTACAAGTACATCGGTGCATCGATCGACATGGATCTGGCCACCGCGAATGATGGCGTGGCGTACTACAACAAGATGGAGGAGCTCTACAAGACGCACTTGGATGGAGTGAAAACAGAGATTAAGAAAGTCGAAGATGATATTAAAAAACATGATGAGAAGCTTAAAAAGATAGAAAATGAAGCCAGTAAAACTAGTGAAAAGACCCAATTGAATGCCAAAAAGGCCGAGCTGGAGAAGTACCTCCCGTTCCTGAATAGCCTCCAAAAGGAGTACGAGTCC	PX841046	NCBI	https://www.ncbi.nlm.nih.gov/nuccore/PX841046
ET_209	Ethiopia	2021-04-12	Asymptomatic	1	M	H01	0.00892495	2543	71.805	1	100	GAGGAGAAGAAGAAGAAGCTTATAGGCAGCTACAAGTACATCGGTGCATCGATCGACATGGATCTGGCCACCGCGAATGATGGCGTGGCGTACTACAACAAGATGGAGGAGCTCTACAAGACGCACTTGGATGGAGTGAAAACAGAGATTAAGAAAGTCGAAGATGATATTAAAAAACATGATGAGAAGCTTAAAAAGATAGAAAATGAAGCCAGTAAAACTAGTGAAAAGACCCAATTGAATGCCAAAAAGGCCGAGCTGGAGAAGTACCTCCCGTTCCTGAATAGCCTCCAAAAGGAGTACGAGTCC	PX841046	NCBI	https://www.ncbi.nlm.nih.gov/nuccore/PX841046
ET_209	Ethiopia	2021-05-14	Asymptomatic	2	M	H01	0.00892495	13223	73.289	1	100	GAGGAGAAGAAGAAGAAGCTTATAGGCAGCTACAAGTACATCGGTGCATCGATCGACATGGATCTGGCCACCGCGAATGATGGCGTGGCGTACTACAACAAGATGGAGGAGCTCTACAAGACGCACTTGGATGGAGTGAAAACAGAGATTAAGAAAGTCGAAGATGATATTAAAAAACATGATGAGAAGCTTAAAAAGATAGAAAATGAAGCCAGTAAAACTAGTGAAAAGACCCAATTGAATGCCAAAAAGGCCGAGCTGGAGAAGTACCTCCCGTTCCTGAATAGCCTCCAAAAGGAGTACGAGTCC	PX841046	NCBI	https://www.ncbi.nlm.nih.gov/nuccore/PX841046
ET_209	Ethiopia	2021-09-24	Asymptomatic	3	M	H01	0.00892495	8362	66.0727	1	100	GAGGAGAAGAAGAAGAAGCTTATAGGCAGCTACAAGTACATCGGTGCATCGATCGACATGGATCTGGCCACCGCGAATGATGGCGTGGCGTACTACAACAAGATGGAGGAGCTCTACAAGACGCACTTGGATGGAGTGAAAACAGAGATTAAGAAAGTCGAAGATGATATTAAAAAACATGATGAGAAGCTTAAAAAGATAGAAAATGAAGCCAGTAAAACTAGTGAAAAGACCCAATTGAATGCCAAAAAGGCCGAGCTGGAGAAGTACCTCCCGTTCCTGAATAGCCTCCAAAAGGAGTACGAGTCC	PX841046	NCBI	https://www.ncbi.nlm.nih.gov/nuccore/PX841046
ET_210	Ethiopia	2020-11-28	Symptomatic	0	M	H26	0.86822	7338	57.9449	3	86.822	GAGGAGAAGAAGAAGAAGTTTCTAGGCAGCTACAAGTACATCGGTGCATCGATCGACAAGGATCTGGCCACCGCGAATGATGGCGTGACCTACTACAACAAGATGGGGGAGCTCTACAAGACGCACTTGGATGGAGTGAAAACAGAGATTAAGAAAGTCGAAGATGATATTAAAAAGCAAGGTGAGGAACTTAAAAAGATAGAAAATGTTACCAGTAAAACTAGTAAAAAGAACGAATTTATTGCCAAAAAGGCCGAGCTGGAGAAGTACCTCCCGTTCCTGAATAGCCTCCAAAAGGAGTACGAGTCC	PX841062	NCBI	https://www.ncbi.nlm.nih.gov/nuccore/PX841062
ET_210	Ethiopia	2021-02-09	Asymptomatic	1	M	H01	0.00892495	8255	68.3707	3	93.7492	GAGGAGAAGAAGAAGAAGCTTATAGGCAGCTACAAGTACATCGGTGCATCGATCGACATGGATCTGGCCACCGCGAATGATGGCGTGGCGTACTACAACAAGATGGAGGAGCTCTACAAGACGCACTTGGATGGAGTGAAAACAGAGATTAAGAAAGTCGAAGATGATATTAAAAAACATGATGAGAAGCTTAAAAAGATAGAAAATGAAGCCAGTAAAACTAGTGAAAAGACCCAATTGAATGCCAAAAAGGCCGAGCTGGAGAAGTACCTCCCGTTCCTGAATAGCCTCCAAAAGGAGTACGAGTCC	PX841046	NCBI	https://www.ncbi.nlm.nih.gov/nuccore/PX841046
ET_210	Ethiopia	2020-11-28	Symptomatic	2	M	H01	0.00892495	2216	76.5343	1	100	GAGGAGAAGAAGAAGAAGCTTATAGGCAGCTACAAGTACATCGGTGCATCGATCGACATGGATCTGGCCACCGCGAATGATGGCGTGGCGTACTACAACAAGATGGAGGAGCTCTACAAGACGCACTTGGATGGAGTGAAAACAGAGATTAAGAAAGTCGAAGATGATATTAAAAAACATGATGAGAAGCTTAAAAAGATAGAAAATGAAGCCAGTAAAACTAGTGAAAAGACCCAATTGAATGCCAAAAAGGCCGAGCTGGAGAAGTACCTCCCGTTCCTGAATAGCCTCCAAAAGGAGTACGAGTCC	PX841046	NCBI	https://www.ncbi.nlm.nih.gov/nuccore/PX841046
ET_210	Ethiopia	2021-04-30	Asymptomatic	3	M	H01	0.00892495	8972	72.1801	1	100	GAGGAGAAGAAGAAGAAGCTTATAGGCAGCTACAAGTACATCGGTGCATCGATCGACATGGATCTGGCCACCGCGAATGATGGCGTGGCGTACTACAACAAGATGGAGGAGCTCTACAAGACGCACTTGGATGGAGTGAAAACAGAGATTAAGAAAGTCGAAGATGATATTAAAAAACATGATGAGAAGCTTAAAAAGATAGAAAATGAAGCCAGTAAAACTAGTGAAAAGACCCAATTGAATGCCAAAAAGGCCGAGCTGGAGAAGTACCTCCCGTTCCTGAATAGCCTCCAAAAGGAGTACGAGTCC	PX841046	NCBI	https://www.ncbi.nlm.nih.gov/nuccore/PX841046
ET_211	Ethiopia	2020-11-18	Symptomatic	0	F	H02	0.0275049	3863	79.006	1	100	GAGGAGAAGAAGAAGAAGCTTATAGGCAGCTACAAGTACATCGGTGCATCGATCGACAAGGATCTGGCCACCGCGAATGATGGCGTGGCGTACTACAACAAGATGGAGGAGCTCTACAAGACGCACTTGACTGCAGTGAATGCACAGATTAAGAAAGTCGAAGATGATATTAAAAAACAAAATGAGGAGCTTAAAAAGATAGAAAATGAAGCCAATAAAACTGCTGAAAAGGCTAAATTTACTGCCAAAAAGGCCGAGTTGGAGAAGTACCTCCCATTCCTGAATAGCCTCCAAAAGGAGTACGAGTCC	PX841048	NCBI	https://www.ncbi.nlm.nih.gov/nuccore/PX841048
ET_211	Ethiopia	2021-05-18	Asymptomatic	1	F	H02	0.0275049	4045	70.3337	1	100	GAGGAGAAGAAGAAGAAGCTTATAGGCAGCTACAAGTACATCGGTGCATCGATCGACAAGGATCTGGCCACCGCGAATGATGGCGTGGCGTACTACAACAAGATGGAGGAGCTCTACAAGACGCACTTGACTGCAGTGAATGCACAGATTAAGAAAGTCGAAGATGATATTAAAAAACAAAATGAGGAGCTTAAAAAGATAGAAAATGAAGCCAATAAAACTGCTGAAAAGGCTAAATTTACTGCCAAAAAGGCCGAGTTGGAGAAGTACCTCCCATTCCTGAATAGCCTCCAAAAGGAGTACGAGTCC	PX841048	NCBI	https://www.ncbi.nlm.nih.gov/nuccore/PX841048
ET_212	Ethiopia	2020-10-26	Symptomatic	0	M	H01	0.00892495	5498	77.028	2	97.0535	GAGGAGAAGAAGAAGAAGCTTATAGGCAGCTACAAGTACATCGGTGCATCGATCGACATGGATCTGGCCACCGCGAATGATGGCGTGGCGTACTACAACAAGATGGAGGAGCTCTACAAGACGCACTTGGATGGAGTGAAAACAGAGATTAAGAAAGTCGAAGATGATATTAAAAAACATGATGAGAAGCTTAAAAAGATAGAAAATGAAGCCAGTAAAACTAGTGAAAAGACCCAATTGAATGCCAAAAAGGCCGAGCTGGAGAAGTACCTCCCGTTCCTGAATAGCCTCCAAAAGGAGTACGAGTCC	PX841046	NCBI	https://www.ncbi.nlm.nih.gov/nuccore/PX841046
ET_212	Ethiopia	2020-11-24	Asymptomatic	1	M	H01	0.00892495	12314	61.158	2	87.5102	GAGGAGAAGAAGAAGAAGCTTATAGGCAGCTACAAGTACATCGGTGCATCGATCGACATGGATCTGGCCACCGCGAATGATGGCGTGGCGTACTACAACAAGATGGAGGAGCTCTACAAGACGCACTTGGATGGAGTGAAAACAGAGATTAAGAAAGTCGAAGATGATATTAAAAAACATGATGAGAAGCTTAAAAAGATAGAAAATGAAGCCAGTAAAACTAGTGAAAAGACCCAATTGAATGCCAAAAAGGCCGAGCTGGAGAAGTACCTCCCGTTCCTGAATAGCCTCCAAAAGGAGTACGAGTCC	PX841046	NCBI	https://www.ncbi.nlm.nih.gov/nuccore/PX841046
ET_212	Ethiopia	2020-12-03	Asymptomatic	2	M	H01	0.00892495	10572	72.2285	1	100	GAGGAGAAGAAGAAGAAGCTTATAGGCAGCTACAAGTACATCGGTGCATCGATCGACATGGATCTGGCCACCGCGAATGATGGCGTGGCGTACTACAACAAGATGGAGGAGCTCTACAAGACGCACTTGGATGGAGTGAAAACAGAGATTAAGAAAGTCGAAGATGATATTAAAAAACATGATGAGAAGCTTAAAAAGATAGAAAATGAAGCCAGTAAAACTAGTGAAAAGACCCAATTGAATGCCAAAAAGGCCGAGCTGGAGAAGTACCTCCCGTTCCTGAATAGCCTCCAAAAGGAGTACGAGTCC	PX841046	NCBI	https://www.ncbi.nlm.nih.gov/nuccore/PX841046
ET_212	Ethiopia	2021-11-05	Asymptomatic	3	M	H01	0.00892495	7977	73.3734	1	100	GAGGAGAAGAAGAAGAAGCTTATAGGCAGCTACAAGTACATCGGTGCATCGATCGACATGGATCTGGCCACCGCGAATGATGGCGTGGCGTACTACAACAAGATGGAGGAGCTCTACAAGACGCACTTGGATGGAGTGAAAACAGAGATTAAGAAAGTCGAAGATGATATTAAAAAACATGATGAGAAGCTTAAAAAGATAGAAAATGAAGCCAGTAAAACTAGTGAAAAGACCCAATTGAATGCCAAAAAGGCCGAGCTGGAGAAGTACCTCCCGTTCCTGAATAGCCTCCAAAAGGAGTACGAGTCC	PX841046	NCBI	https://www.ncbi.nlm.nih.gov/nuccore/PX841046
ET_213	Ethiopia	2020-11-22	Symptomatic	0	M	H01	0.00892495	4859	73.6571	1	100	GAGGAGAAGAAGAAGAAGCTTATAGGCAGCTACAAGTACATCGGTGCATCGATCGACATGGATCTGGCCACCGCGAATGATGGCGTGGCGTACTACAACAAGATGGAGGAGCTCTACAAGACGCACTTGGATGGAGTGAAAACAGAGATTAAGAAAGTCGAAGATGATATTAAAAAACATGATGAGAAGCTTAAAAAGATAGAAAATGAAGCCAGTAAAACTAGTGAAAAGACCCAATTGAATGCCAAAAAGGCCGAGCTGGAGAAGTACCTCCCGTTCCTGAATAGCCTCCAAAAGGAGTACGAGTCC	PX841046	NCBI	https://www.ncbi.nlm.nih.gov/nuccore/PX841046
ET_213	Ethiopia	2020-12-24	Asymptomatic	1	M	H01	0.00892495	9350	72.7914	1	100	GAGGAGAAGAAGAAGAAGCTTATAGGCAGCTACAAGTACATCGGTGCATCGATCGACATGGATCTGGCCACCGCGAATGATGGCGTGGCGTACTACAACAAGATGGAGGAGCTCTACAAGACGCACTTGGATGGAGTGAAAACAGAGATTAAGAAAGTCGAAGATGATATTAAAAAACATGATGAGAAGCTTAAAAAGATAGAAAATGAAGCCAGTAAAACTAGTGAAAAGACCCAATTGAATGCCAAAAAGGCCGAGCTGGAGAAGTACCTCCCGTTCCTGAATAGCCTCCAAAAGGAGTACGAGTCC	PX841046	NCBI	https://www.ncbi.nlm.nih.gov/nuccore/PX841046
ET_213	Ethiopia	2021-01-04	Asymptomatic	2	M	H01	0.00892495	18304	70.3726	3	97.3285	GAGGAGAAGAAGAAGAAGCTTATAGGCAGCTACAAGTACATCGGTGCATCGATCGACATGGATCTGGCCACCGCGAATGATGGCGTGGCGTACTACAACAAGATGGAGGAGCTCTACAAGACGCACTTGGATGGAGTGAAAACAGAGATTAAGAAAGTCGAAGATGATATTAAAAAACATGATGAGAAGCTTAAAAAGATAGAAAATGAAGCCAGTAAAACTAGTGAAAAGACCCAATTGAATGCCAAAAAGGCCGAGCTGGAGAAGTACCTCCCGTTCCTGAATAGCCTCCAAAAGGAGTACGAGTCC	PX841046	NCBI	https://www.ncbi.nlm.nih.gov/nuccore/PX841046
ET_213	Ethiopia	2020-11-28	Asymptomatic	3	M	H01	0.00892495	8917	59.0894	1	100	GAGGAGAAGAAGAAGAAGCTTATAGGCAGCTACAAGTACATCGGTGCATCGATCGACATGGATCTGGCCACCGCGAATGATGGCGTGGCGTACTACAACAAGATGGAGGAGCTCTACAAGACGCACTTGGATGGAGTGAAAACAGAGATTAAGAAAGTCGAAGATGATATTAAAAAACATGATGAGAAGCTTAAAAAGATAGAAAATGAAGCCAGTAAAACTAGTGAAAAGACCCAATTGAATGCCAAAAAGGCCGAGCTGGAGAAGTACCTCCCGTTCCTGAATAGCCTCCAAAAGGAGTACGAGTCC	PX841046	NCBI	https://www.ncbi.nlm.nih.gov/nuccore/PX841046
ET_213	Ethiopia	2021-03-14	Asymptomatic	4	M	H01	0.00892495	12121	68.1462	2	96.3287	GAGGAGAAGAAGAAGAAGCTTATAGGCAGCTACAAGTACATCGGTGCATCGATCGACATGGATCTGGCCACCGCGAATGATGGCGTGGCGTACTACAACAAGATGGAGGAGCTCTACAAGACGCACTTGGATGGAGTGAAAACAGAGATTAAGAAAGTCGAAGATGATATTAAAAAACATGATGAGAAGCTTAAAAAGATAGAAAATGAAGCCAGTAAAACTAGTGAAAAGACCCAATTGAATGCCAAAAAGGCCGAGCTGGAGAAGTACCTCCCGTTCCTGAATAGCCTCCAAAAGGAGTACGAGTCC	PX841046	NCBI	https://www.ncbi.nlm.nih.gov/nuccore/PX841046
ET_214	Ethiopia	2021-01-13	Symptomatic	0	F	H37	1	793	66.3304	1	100	GAGAAGAAGAAGAAGAAGCTTATAGGCAGCTACAAGTACATCGGTGCATCGATCGACAAGGATCTGGCCACCGCGAATGATGGCGTGGCGTACTACAACAAGATGGAGGAGCTCTACAAGACGCACTTGACTGCAGTGAATGCACAGATTAAGAAAGTCGAAGATGATATTAAAAAACAAAATGAGGAGCTTAAAAAGATAGAAAATGAAGCCAATAAAACTGCTGAAAAGGCTAAATTTACTGCCAAAAAGGCCGAGTTGGAGAAGTACCTCCCATTCCTGAATAGCCTCCAAAAGGAGTACGAGTCC	PX841063	NCBI	https://www.ncbi.nlm.nih.gov/nuccore/PX841063
ET_214	Ethiopia	2021-02-18	Asymptomatic	1	F	H01	0.00892495	4038	64.4874	1	100	GAGGAGAAGAAGAAGAAGCTTATAGGCAGCTACAAGTACATCGGTGCATCGATCGACATGGATCTGGCCACCGCGAATGATGGCGTGGCGTACTACAACAAGATGGAGGAGCTCTACAAGACGCACTTGGATGGAGTGAAAACAGAGATTAAGAAAGTCGAAGATGATATTAAAAAACATGATGAGAAGCTTAAAAAGATAGAAAATGAAGCCAGTAAAACTAGTGAAAAGACCCAATTGAATGCCAAAAAGGCCGAGCTGGAGAAGTACCTCCCGTTCCTGAATAGCCTCCAAAAGGAGTACGAGTCC	PX841046	NCBI	https://www.ncbi.nlm.nih.gov/nuccore/PX841046
ET_214	Ethiopia	2021-03-13	Asymptomatic	2	F	H01	0.00892495	7572	72.0285	1	100	GAGGAGAAGAAGAAGAAGCTTATAGGCAGCTACAAGTACATCGGTGCATCGATCGACATGGATCTGGCCACCGCGAATGATGGCGTGGCGTACTACAACAAGATGGAGGAGCTCTACAAGACGCACTTGGATGGAGTGAAAACAGAGATTAAGAAAGTCGAAGATGATATTAAAAAACATGATGAGAAGCTTAAAAAGATAGAAAATGAAGCCAGTAAAACTAGTGAAAAGACCCAATTGAATGCCAAAAAGGCCGAGCTGGAGAAGTACCTCCCGTTCCTGAATAGCCTCCAAAAGGAGTACGAGTCC	PX841046	NCBI	https://www.ncbi.nlm.nih.gov/nuccore/PX841046
ET_214	Ethiopia	2021-05-13	Asymptomatic	3	F	H01	0.00892495	2612	66.1562	1	100	GAGGAGAAGAAGAAGAAGCTTATAGGCAGCTACAAGTACATCGGTGCATCGATCGACATGGATCTGGCCACCGCGAATGATGGCGTGGCGTACTACAACAAGATGGAGGAGCTCTACAAGACGCACTTGGATGGAGTGAAAACAGAGATTAAGAAAGTCGAAGATGATATTAAAAAACATGATGAGAAGCTTAAAAAGATAGAAAATGAAGCCAGTAAAACTAGTGAAAAGACCCAATTGAATGCCAAAAAGGCCGAGCTGGAGAAGTACCTCCCGTTCCTGAATAGCCTCCAAAAGGAGTACGAGTCC	PX841046	NCBI	https://www.ncbi.nlm.nih.gov/nuccore/PX841046
ET_215	Ethiopia	2021-01-11	Symptomatic	0	F	H01	0.00892495	346	100	1	100	GAGGAGAAGAAGAAGAAGCTTATAGGCAGCTACAAGTACATCGGTGCATCGATCGACATGGATCTGGCCACCGCGAATGATGGCGTGGCGTACTACAACAAGATGGAGGAGCTCTACAAGACGCACTTGGATGGAGTGAAAACAGAGATTAAGAAAGTCGAAGATGATATTAAAAAACATGATGAGAAGCTTAAAAAGATAGAAAATGAAGCCAGTAAAACTAGTGAAAAGACCCAATTGAATGCCAAAAAGGCCGAGCTGGAGAAGTACCTCCCGTTCCTGAATAGCCTCCAAAAGGAGTACGAGTCC	PX841046	NCBI	https://www.ncbi.nlm.nih.gov/nuccore/PX841046
ET_215	Ethiopia	2021-02-10	Asymptomatic	1	F	H01	0.00892495	5305	68.0867	1	100	GAGGAGAAGAAGAAGAAGCTTATAGGCAGCTACAAGTACATCGGTGCATCGATCGACATGGATCTGGCCACCGCGAATGATGGCGTGGCGTACTACAACAAGATGGAGGAGCTCTACAAGACGCACTTGGATGGAGTGAAAACAGAGATTAAGAAAGTCGAAGATGATATTAAAAAACATGATGAGAAGCTTAAAAAGATAGAAAATGAAGCCAGTAAAACTAGTGAAAAGACCCAATTGAATGCCAAAAAGGCCGAGCTGGAGAAGTACCTCCCGTTCCTGAATAGCCTCCAAAAGGAGTACGAGTCC	PX841046	NCBI	https://www.ncbi.nlm.nih.gov/nuccore/PX841046
ET_215	Ethiopia	2021-04-17	Asymptomatic	2	F	H01	0.00892495	2349	76.4155	1	100	GAGGAGAAGAAGAAGAAGCTTATAGGCAGCTACAAGTACATCGGTGCATCGATCGACATGGATCTGGCCACCGCGAATGATGGCGTGGCGTACTACAACAAGATGGAGGAGCTCTACAAGACGCACTTGGATGGAGTGAAAACAGAGATTAAGAAAGTCGAAGATGATATTAAAAAACATGATGAGAAGCTTAAAAAGATAGAAAATGAAGCCAGTAAAACTAGTGAAAAGACCCAATTGAATGCCAAAAAGGCCGAGCTGGAGAAGTACCTCCCGTTCCTGAATAGCCTCCAAAAGGAGTACGAGTCC	PX841046	NCBI	https://www.ncbi.nlm.nih.gov/nuccore/PX841046
ET_215	Ethiopia	2021-06-13	Asymptomatic	3	F	H01	0.00892495	11488	80.8235	1	100	GAGGAGAAGAAGAAGAAGCTTATAGGCAGCTACAAGTACATCGGTGCATCGATCGACATGGATCTGGCCACCGCGAATGATGGCGTGGCGTACTACAACAAGATGGAGGAGCTCTACAAGACGCACTTGGATGGAGTGAAAACAGAGATTAAGAAAGTCGAAGATGATATTAAAAAACATGATGAGAAGCTTAAAAAGATAGAAAATGAAGCCAGTAAAACTAGTGAAAAGACCCAATTGAATGCCAAAAAGGCCGAGCTGGAGAAGTACCTCCCGTTCCTGAATAGCCTCCAAAAGGAGTACGAGTCC	PX841046	NCBI	https://www.ncbi.nlm.nih.gov/nuccore/PX841046
ET_215	Ethiopia	2021-07-19	Asymptomatic	4	F	H01	0.00892495	2730	63.0037	1	100	GAGGAGAAGAAGAAGAAGCTTATAGGCAGCTACAAGTACATCGGTGCATCGATCGACATGGATCTGGCCACCGCGAATGATGGCGTGGCGTACTACAACAAGATGGAGGAGCTCTACAAGACGCACTTGGATGGAGTGAAAACAGAGATTAAGAAAGTCGAAGATGATATTAAAAAACATGATGAGAAGCTTAAAAAGATAGAAAATGAAGCCAGTAAAACTAGTGAAAAGACCCAATTGAATGCCAAAAAGGCCGAGCTGGAGAAGTACCTCCCGTTCCTGAATAGCCTCCAAAAGGAGTACGAGTCC	PX841046	NCBI	https://www.ncbi.nlm.nih.gov/nuccore/PX841046
ET_216	Ethiopia	2021-02-05	Symptomatic	0	M	H03	0.0231214	6756	79.0112	2	97.4245	GAGGAGAAGAAGAAGAAGCTTATAGGCAGCTACAAGTACATCGGTGCATCGATCGACATGGATCTGGCCACCGCGAATGATGGCGTGGCGTACTACAACAAGATGGAGGAGCTCTACAAGACGCACTTGACTGCAGTGAATGAAGAGGTTAAGAAAGTCGAAGCTGATATTAAAAAAGAAGATGATAAGATTAAAAAGATAGAAAATGATACCACTAAAACTACTGAAAAGACCCAATCGATGGCCAAAAAGGCCGAGCTGGAGAAGTACCTCCCGTTCCTGAATAGCCTCCAAAAGGAGTACGAGTCC	PX841052	NCBI	https://www.ncbi.nlm.nih.gov/nuccore/PX841052
ET_216	Ethiopia	2021-03-09	Asymptomatic	1	M	H03	0.0231214	2602	56.226	2	89.3543	GAGGAGAAGAAGAAGAAGCTTATAGGCAGCTACAAGTACATCGGTGCATCGATCGACATGGATCTGGCCACCGCGAATGATGGCGTGGCGTACTACAACAAGATGGAGGAGCTCTACAAGACGCACTTGACTGCAGTGAATGAAGAGGTTAAGAAAGTCGAAGCTGATATTAAAAAAGAAGATGATAAGATTAAAAAGATAGAAAATGATACCACTAAAACTACTGAAAAGACCCAATCGATGGCCAAAAAGGCCGAGCTGGAGAAGTACCTCCCGTTCCTGAATAGCCTCCAAAAGGAGTACGAGTCC	PX841052	NCBI	https://www.ncbi.nlm.nih.gov/nuccore/PX841052
ET_216	Ethiopia	2021-05-17	Asymptomatic	2	M	H03	0.0231214	1030	68.4466	1	100	GAGGAGAAGAAGAAGAAGCTTATAGGCAGCTACAAGTACATCGGTGCATCGATCGACATGGATCTGGCCACCGCGAATGATGGCGTGGCGTACTACAACAAGATGGAGGAGCTCTACAAGACGCACTTGACTGCAGTGAATGAAGAGGTTAAGAAAGTCGAAGCTGATATTAAAAAAGAAGATGATAAGATTAAAAAGATAGAAAATGATACCACTAAAACTACTGAAAAGACCCAATCGATGGCCAAAAAGGCCGAGCTGGAGAAGTACCTCCCGTTCCTGAATAGCCTCCAAAAGGAGTACGAGTCC	PX841052	NCBI	https://www.ncbi.nlm.nih.gov/nuccore/PX841052
ET_216	Ethiopia	2021-08-24	Asymptomatic	3	M	H03	0.0231214	2110	48.436	2	83.5545	GAGGAGAAGAAGAAGAAGCTTATAGGCAGCTACAAGTACATCGGTGCATCGATCGACATGGATCTGGCCACCGCGAATGATGGCGTGGCGTACTACAACAAGATGGAGGAGCTCTACAAGACGCACTTGACTGCAGTGAATGAAGAGGTTAAGAAAGTCGAAGCTGATATTAAAAAAGAAGATGATAAGATTAAAAAGATAGAAAATGATACCACTAAAACTACTGAAAAGACCCAATCGATGGCCAAAAAGGCCGAGCTGGAGAAGTACCTCCCGTTCCTGAATAGCCTCCAAAAGGAGTACGAGTCC	PX841052	NCBI	https://www.ncbi.nlm.nih.gov/nuccore/PX841052
ET_217	Ethiopia	2020-09-18	Symptomatic	0	F	H02	0.0275049	5826	72.1078	1	100	GAGGAGAAGAAGAAGAAGCTTATAGGCAGCTACAAGTACATCGGTGCATCGATCGACAAGGATCTGGCCACCGCGAATGATGGCGTGGCGTACTACAACAAGATGGAGGAGCTCTACAAGACGCACTTGACTGCAGTGAATGCACAGATTAAGAAAGTCGAAGATGATATTAAAAAACAAAATGAGGAGCTTAAAAAGATAGAAAATGAAGCCAATAAAACTGCTGAAAAGGCTAAATTTACTGCCAAAAAGGCCGAGTTGGAGAAGTACCTCCCATTCCTGAATAGCCTCCAAAAGGAGTACGAGTCC	PX841048	NCBI	https://www.ncbi.nlm.nih.gov/nuccore/PX841048
ET_217	Ethiopia	2020-10-29	Asymptomatic	1	F	H02	0.0275049	5071	75.2317	1	100	GAGGAGAAGAAGAAGAAGCTTATAGGCAGCTACAAGTACATCGGTGCATCGATCGACAAGGATCTGGCCACCGCGAATGATGGCGTGGCGTACTACAACAAGATGGAGGAGCTCTACAAGACGCACTTGACTGCAGTGAATGCACAGATTAAGAAAGTCGAAGATGATATTAAAAAACAAAATGAGGAGCTTAAAAAGATAGAAAATGAAGCCAATAAAACTGCTGAAAAGGCTAAATTTACTGCCAAAAAGGCCGAGTTGGAGAAGTACCTCCCATTCCTGAATAGCCTCCAAAAGGAGTACGAGTCC	PX841048	NCBI	https://www.ncbi.nlm.nih.gov/nuccore/PX841048
ET_217	Ethiopia	2020-12-16	Asymptomatic	2	F	H02	0.0275049	2865	72.6353	1	100	GAGGAGAAGAAGAAGAAGCTTATAGGCAGCTACAAGTACATCGGTGCATCGATCGACAAGGATCTGGCCACCGCGAATGATGGCGTGGCGTACTACAACAAGATGGAGGAGCTCTACAAGACGCACTTGACTGCAGTGAATGCACAGATTAAGAAAGTCGAAGATGATATTAAAAAACAAAATGAGGAGCTTAAAAAGATAGAAAATGAAGCCAATAAAACTGCTGAAAAGGCTAAATTTACTGCCAAAAAGGCCGAGTTGGAGAAGTACCTCCCATTCCTGAATAGCCTCCAAAAGGAGTACGAGTCC	PX841048	NCBI	https://www.ncbi.nlm.nih.gov/nuccore/PX841048
ET_217	Ethiopia	2021-01-23	Asymptomatic	3	F	H41	0.529486	3951	31.916	2	52.9486	GAGGAGAAGAAGAAGAAGCTTATAGGCAGCTACAAGTACATCGGTGCATCGATCGACAAGGATCTGGCCACCGCGAATGATGGCGTGGCGTACTACAACAAGATGGAGGAGCTCTACAAGACGCACTTGACTGCAGTGAATGCACAGATTAAGAAAGTCGAAGATGATATTAAAAAACAAAATGAGGAGCTTAAAAAGATAGAAAATGAAGCCAATAAAACTGCTGAAAAGGCTAAATTTACTGCCAAAAAGGCCGAGTTGGAGAAGTACCTCCCATCCCTGAATAGCCTCCAAAAGGAGTACGAGTCC	PX841069	NCBI	https://www.ncbi.nlm.nih.gov/nuccore/PX841069
ET_217	Ethiopia	2021-06-17	Asymptomatic	4	F	H02	0.0275049	257	100	1	100	GAGGAGAAGAAGAAGAAGCTTATAGGCAGCTACAAGTACATCGGTGCATCGATCGACAAGGATCTGGCCACCGCGAATGATGGCGTGGCGTACTACAACAAGATGGAGGAGCTCTACAAGACGCACTTGACTGCAGTGAATGCACAGATTAAGAAAGTCGAAGATGATATTAAAAAACAAAATGAGGAGCTTAAAAAGATAGAAAATGAAGCCAATAAAACTGCTGAAAAGGCTAAATTTACTGCCAAAAAGGCCGAGTTGGAGAAGTACCTCCCATTCCTGAATAGCCTCCAAAAGGAGTACGAGTCC	PX841048	NCBI	https://www.ncbi.nlm.nih.gov/nuccore/PX841048
ET_217	Ethiopia	2021-08-11	Asymptomatic	5	F	H02	0.0275049	11475	58.6667	1	100	GAGGAGAAGAAGAAGAAGCTTATAGGCAGCTACAAGTACATCGGTGCATCGATCGACAAGGATCTGGCCACCGCGAATGATGGCGTGGCGTACTACAACAAGATGGAGGAGCTCTACAAGACGCACTTGACTGCAGTGAATGCACAGATTAAGAAAGTCGAAGATGATATTAAAAAACAAAATGAGGAGCTTAAAAAGATAGAAAATGAAGCCAATAAAACTGCTGAAAAGGCTAAATTTACTGCCAAAAAGGCCGAGTTGGAGAAGTACCTCCCATTCCTGAATAGCCTCCAAAAGGAGTACGAGTCC	PX841048	NCBI	https://www.ncbi.nlm.nih.gov/nuccore/PX841048
ET_218	Ethiopia	2020-10-09	Symptomatic	0	F	H01	0.00892495	10788	73.0256	1	100	GAGGAGAAGAAGAAGAAGCTTATAGGCAGCTACAAGTACATCGGTGCATCGATCGACATGGATCTGGCCACCGCGAATGATGGCGTGGCGTACTACAACAAGATGGAGGAGCTCTACAAGACGCACTTGGATGGAGTGAAAACAGAGATTAAGAAAGTCGAAGATGATATTAAAAAACATGATGAGAAGCTTAAAAAGATAGAAAATGAAGCCAGTAAAACTAGTGAAAAGACCCAATTGAATGCCAAAAAGGCCGAGCTGGAGAAGTACCTCCCGTTCCTGAATAGCCTCCAAAAGGAGTACGAGTCC	PX841046	NCBI	https://www.ncbi.nlm.nih.gov/nuccore/PX841046
ET_218	Ethiopia	2021-03-01	Asymptomatic	1	F	H01	0.00892495	5516	88.3067	1	100	GAGGAGAAGAAGAAGAAGCTTATAGGCAGCTACAAGTACATCGGTGCATCGATCGACATGGATCTGGCCACCGCGAATGATGGCGTGGCGTACTACAACAAGATGGAGGAGCTCTACAAGACGCACTTGGATGGAGTGAAAACAGAGATTAAGAAAGTCGAAGATGATATTAAAAAACATGATGAGAAGCTTAAAAAGATAGAAAATGAAGCCAGTAAAACTAGTGAAAAGACCCAATTGAATGCCAAAAAGGCCGAGCTGGAGAAGTACCTCCCGTTCCTGAATAGCCTCCAAAAGGAGTACGAGTCC	PX841046	NCBI	https://www.ncbi.nlm.nih.gov/nuccore/PX841046
ET_218	Ethiopia	2021-04-29	Asymptomatic	2	F	H01	0.00892495	5878	68.6798	1	100	GAGGAGAAGAAGAAGAAGCTTATAGGCAGCTACAAGTACATCGGTGCATCGATCGACATGGATCTGGCCACCGCGAATGATGGCGTGGCGTACTACAACAAGATGGAGGAGCTCTACAAGACGCACTTGGATGGAGTGAAAACAGAGATTAAGAAAGTCGAAGATGATATTAAAAAACATGATGAGAAGCTTAAAAAGATAGAAAATGAAGCCAGTAAAACTAGTGAAAAGACCCAATTGAATGCCAAAAAGGCCGAGCTGGAGAAGTACCTCCCGTTCCTGAATAGCCTCCAAAAGGAGTACGAGTCC	PX841046	NCBI	https://www.ncbi.nlm.nih.gov/nuccore/PX841046
ET_218	Ethiopia	2021-07-21	Asymptomatic	3	F	H01	0.00892495	5909	71.1457	1	100	GAGGAGAAGAAGAAGAAGCTTATAGGCAGCTACAAGTACATCGGTGCATCGATCGACATGGATCTGGCCACCGCGAATGATGGCGTGGCGTACTACAACAAGATGGAGGAGCTCTACAAGACGCACTTGGATGGAGTGAAAACAGAGATTAAGAAAGTCGAAGATGATATTAAAAAACATGATGAGAAGCTTAAAAAGATAGAAAATGAAGCCAGTAAAACTAGTGAAAAGACCCAATTGAATGCCAAAAAGGCCGAGCTGGAGAAGTACCTCCCGTTCCTGAATAGCCTCCAAAAGGAGTACGAGTCC	PX841046	NCBI	https://www.ncbi.nlm.nih.gov/nuccore/PX841046
ET_218	Ethiopia	2021-09-24	Asymptomatic	4	F	H01	0.00892495	3355	74.6945	1	100	GAGGAGAAGAAGAAGAAGCTTATAGGCAGCTACAAGTACATCGGTGCATCGATCGACATGGATCTGGCCACCGCGAATGATGGCGTGGCGTACTACAACAAGATGGAGGAGCTCTACAAGACGCACTTGGATGGAGTGAAAACAGAGATTAAGAAAGTCGAAGATGATATTAAAAAACATGATGAGAAGCTTAAAAAGATAGAAAATGAAGCCAGTAAAACTAGTGAAAAGACCCAATTGAATGCCAAAAAGGCCGAGCTGGAGAAGTACCTCCCGTTCCTGAATAGCCTCCAAAAGGAGTACGAGTCC	PX841046	NCBI	https://www.ncbi.nlm.nih.gov/nuccore/PX841046
ET_218	Ethiopia	2021-10-11	Asymptomatic	5	F	H01	0.00892495	3905	67.8873	1	100	GAGGAGAAGAAGAAGAAGCTTATAGGCAGCTACAAGTACATCGGTGCATCGATCGACATGGATCTGGCCACCGCGAATGATGGCGTGGCGTACTACAACAAGATGGAGGAGCTCTACAAGACGCACTTGGATGGAGTGAAAACAGAGATTAAGAAAGTCGAAGATGATATTAAAAAACATGATGAGAAGCTTAAAAAGATAGAAAATGAAGCCAGTAAAACTAGTGAAAAGACCCAATTGAATGCCAAAAAGGCCGAGCTGGAGAAGTACCTCCCGTTCCTGAATAGCCTCCAAAAGGAGTACGAGTCC	PX841046	NCBI	https://www.ncbi.nlm.nih.gov/nuccore/PX841046
ET_219	Ethiopia	2020-11-22	Symptomatic	0	M	H01	0.00892495	15264	75.2948	2	96.9733	GAGGAGAAGAAGAAGAAGCTTATAGGCAGCTACAAGTACATCGGTGCATCGATCGACATGGATCTGGCCACCGCGAATGATGGCGTGGCGTACTACAACAAGATGGAGGAGCTCTACAAGACGCACTTGGATGGAGTGAAAACAGAGATTAAGAAAGTCGAAGATGATATTAAAAAACATGATGAGAAGCTTAAAAAGATAGAAAATGAAGCCAGTAAAACTAGTGAAAAGACCCAATTGAATGCCAAAAAGGCCGAGCTGGAGAAGTACCTCCCGTTCCTGAATAGCCTCCAAAAGGAGTACGAGTCC	PX841046	NCBI	https://www.ncbi.nlm.nih.gov/nuccore/PX841046
ET_219	Ethiopia	2020-12-22	Asymptomatic	1	M	H33	0.589548	5109	36.6021	2	58.9548	GAGGAGAAGAAGAAGAAGCTTATAGGCAGCTACAAGTACATCGGTGCATCGATCGACATGGATCTGGCCACCGCGAATGATGGCGTGGCGTACTACAACAAGATGGAGGAGCTCCACAAGACGCACTTGGATGGAGTGAAAACAGAGATTAAGAAAGTCGAAGATGATATTAAAAAACATGATGAGAAGCTTAAAAAGATAGAAAATGAAGCCAGTAAAACTAGTGAAAAGACCCAATTGAATGCCAAAAAGGCCGAGCTGGAGAAGTACCTCCCGTTCCTGAATAGCCTCCAAAAGGAGTACGAGTCC	PX841065	NCBI	https://www.ncbi.nlm.nih.gov/nuccore/PX841065
ET_219	Ethiopia	2021-01-01	Asymptomatic	2	M	H01	0.00892495	15243	73.9487	1	100	GAGGAGAAGAAGAAGAAGCTTATAGGCAGCTACAAGTACATCGGTGCATCGATCGACATGGATCTGGCCACCGCGAATGATGGCGTGGCGTACTACAACAAGATGGAGGAGCTCTACAAGACGCACTTGGATGGAGTGAAAACAGAGATTAAGAAAGTCGAAGATGATATTAAAAAACATGATGAGAAGCTTAAAAAGATAGAAAATGAAGCCAGTAAAACTAGTGAAAAGACCCAATTGAATGCCAAAAAGGCCGAGCTGGAGAAGTACCTCCCGTTCCTGAATAGCCTCCAAAAGGAGTACGAGTCC	PX841046	NCBI	https://www.ncbi.nlm.nih.gov/nuccore/PX841046
ET_219	Ethiopia	2021-01-20	Asymptomatic	3	M	H01	0.00892495	2318	59.3184	2	84.1242	GAGGAGAAGAAGAAGAAGCTTATAGGCAGCTACAAGTACATCGGTGCATCGATCGACATGGATCTGGCCACCGCGAATGATGGCGTGGCGTACTACAACAAGATGGAGGAGCTCTACAAGACGCACTTGGATGGAGTGAAAACAGAGATTAAGAAAGTCGAAGATGATATTAAAAAACATGATGAGAAGCTTAAAAAGATAGAAAATGAAGCCAGTAAAACTAGTGAAAAGACCCAATTGAATGCCAAAAAGGCCGAGCTGGAGAAGTACCTCCCGTTCCTGAATAGCCTCCAAAAGGAGTACGAGTCC	PX841046	NCBI	https://www.ncbi.nlm.nih.gov/nuccore/PX841046
ET_219	Ethiopia	2021-03-04	Asymptomatic	4	M	H01	0.00892495	4153	68.8418	1	100	GAGGAGAAGAAGAAGAAGCTTATAGGCAGCTACAAGTACATCGGTGCATCGATCGACATGGATCTGGCCACCGCGAATGATGGCGTGGCGTACTACAACAAGATGGAGGAGCTCTACAAGACGCACTTGGATGGAGTGAAAACAGAGATTAAGAAAGTCGAAGATGATATTAAAAAACATGATGAGAAGCTTAAAAAGATAGAAAATGAAGCCAGTAAAACTAGTGAAAAGACCCAATTGAATGCCAAAAAGGCCGAGCTGGAGAAGTACCTCCCGTTCCTGAATAGCCTCCAAAAGGAGTACGAGTCC	PX841046	NCBI	https://www.ncbi.nlm.nih.gov/nuccore/PX841046
ET_219	Ethiopia	2021-07-05	Asymptomatic	5	M	H62	1	571	100	1	100	GAGGAGAAGAAGAAGAAGCTTATAGGCAGCTACAAGTACATCGGTGCATCGATCGACATGGATCTGGCCACCGCGAATGATGGCGTGGCGTACTACAACAAGATGGAGGAGCTCTGCAAGACGCACTTGGATGGAGTGAAAACAGAGATTAAGAAAGTCGAAGATGATATTAAAAAACATGATGAGAAGCTTAAAAAGATAGAAAATGAAGCCAGTAAAACTAGTGAAAAGACCCAATTGAATGCCAAAAAGGCCGAGCTGGAGAAGTACCTCCCGTTCCTGAATAGCCTCCAAAAGGAGTACGAGTCC	PX841070	NCBI	https://www.ncbi.nlm.nih.gov/nuccore/PX841070
