# Supplementary material for: High genetic diversity, clonal activation of hypnozoites and relapse of Plasmodium vivax isolates in low-transmission setting of Ethiopia
Source: Research Square preprint supplement (doi:10.21203/rs.3.rs-9080494/v1), 2026-03-26
Supplement: Supplementary file 3 [file b90f53de499dbc5ac5316704.xlsx]

## Sheet: Sheet1
Additional file 2: Population frequency, sample counts, and GenBank blast results of the 67 haplotypes identified in the 370 P. vivax samples
Haplotype	h_PopFrac	h_highestFrac	h_SampCnt	Query GI	Percentage of identical matches	Alignment length	Number of mismatches
H01	0.00892495	1	162	MG675451.1	0.9739	309	8
H02	0.0275049	1	136	MG675448.1	0.9935	309	2
H03	0.0231214	1	33	MG675439.1	0.9837	309	5
H04	0.00328491	0.1058	27	MG675451.1	0.9741	309	8
H05	0.0204119	0.128368	30	MG675448.1	0.9935	309	2
H06	0.0245161	1	15	MG675450.1	0.9805	309	6
H07	0.0637647	1	16	MG675438.1	1	309	0
H08	0.487496	1	10	MG675445.1	0.9902	309	3
H09	0.894651	1	7	MG675452.1	0.9935	309	2
H10	0.46469	1	6	MG675453.1	0.9805	309	6
H11	0.500697	1	4	MG675440.1	0.9902	309	3
H12	0.0647621	1	4	MG675442.1	0.9805	309	6
H13	0.0315241	0.646149	5	MG675454.1	0.9935	309	2
H14	0.0187046	0.0421763	5	MG675439.1	0.9838	309	5
H15	0.16244	0.777119	3	MG675444.1	0.9805	309	6
H16	0.993145	1	3	MG675437.1	0.9902	309	3
H17	0.0276912	0.0316054	3	MG675452.1	0.9935	309	2
H18	0.041841	1	3	MG675456.1	0.9837	309	5
H19	1	1	1	MG675451.1	0.9674	309	10
H20	0.620025	0.620025	1	MG675451.1	0.9707	309	9
H21	0.39239	0.39239	1	MG675451.1	0.9707	309	9
H22	0.158758	0.158758	1	MG675451.1	0.9707	309	9
H23	0.357354	0.357354	1	MG675438.1	0.9967	309	1
H24	0.164661	0.164661	1	MG675453.1	0.9772	309	7
H25	0.122513	0.122513	1	MG675450.1	0.9707	309	9
H26	0.86822	0.86822	1	MG675450.1	0.9739	309	8
H27	0.00685476	0.00685476	1	MG675437.1	0.9903	309	3
H28	0.0256631	0.0256631	1	MG675445.1	0.9903	309	3
H29	0.0349261	0.0349261	1	MG675451.1	0.9707	309	9
H30	0.305458	0.305458	1	MG675448.1	0.9902	309	3
H31	0.0429521	0.0429521	1	MG675448.1	0.9902	309	3
H32	0.143082	0.143082	1	MG675439.1	0.9805	309	6
H33	0.589548	0.589548	1	MG675451.1	0.9707	309	9
H34	0.0367048	0.0753495	2	MG675448.1	0.9902	309	3
H35	0.0200303	0.121876	2	MG675451.1	0.9707	309	9
H36	0.024238	0.0377635	2	MG675438.1	1	309	0
H37	1	1	1	MG675448.1	0.9934	309	2
H38	0.751195	0.751195	1	MG675448.1	0.9902	309	3
H39	0.0179521	0.0179521	1	MG675451.1	0.9707	309	9
H40	0.105349	0.105349	1	MG675452.1	0.9902	309	3
H41	0.529486	0.529486	1	MG675448.1	0.9902	309	3
H42	0.553716	0.553716	1	MG675451.1	0.9707	309	9
H43	1	1	1	MG675450.1	0.9772	309	7
H44	0.389128	0.389128	1	MG675451.1	0.9707	309	9
H45	0.124898	0.124898	1	MG675451.1	0.9707	309	9
H46	0.648284	0.648284	1	MG675451.1	0.9707	309	9
H47	0.134991	0.134991	1	MG675445.1	0.987	309	4
H48	1	1	1	MG675448.1	0.9902	309	3
H49	0.0485928	0.0485928	1	MG675451.1	0.9707	309	9
H50	0.037633	0.037633	1	MG675451.1	0.9707	309	9
H51	0.0446429	0.0446429	1	MG675448.1	0.9902	309	3
H52	0.054023	0.054023	1	MG675448.1	0.9902	309	3
H53	0.0386841	0.0386841	1	MG675451.1	0.9707	309	9
H54	0.0270441	0.0270441	1	MG675448.1	0.9902	309	3
H55	0.0175264	0.0175264	1	MG675448.1	0.9902	309	3
H56	0.12865	0.12865	1	GQ890964.1	0.9805	309	6
H57	0.055322	0.055322	1	MG675438.1	0.9935	309	2
H58	0.164455	0.164455	1	MG675439.1	0.9805	309	6
H59	0.0168383	0.0168383	1	GQ890979.1	0.9739	309	8
H60	0.0131579	0.0131579	1	MG675448.1	0.9902	309	3
H61	0.0857814	0.0857814	1	MG675451.1	0.9707	309	9
H62	1	1	1	MG675451.1	0.9707	309	9
H63	0.00743007	0.00743007	1	MG675451.1	0.9707	309	9
H64	0.0213096	0.0213096	1	MG675451.1	0.9707	309	9
H65	0.0234824	0.0234824	1	MG675451.1	0.9738	309	8
H66	0.106457	0.106457	1	MG675439.1	0.9772	309	7
H67	0.0431023	0.0431023	1	MG675450.1	0.9806	309	6
